# Supplementary material for: Identifying relative efficacy of components of prehabilitation in adult surgical patients: protocol for a systematic review and component network meta-analysis
Source: PubMed Central journal article supplement — BMJ Open. 2022 Nov 16;12(11):e068797. doi: 10.1136/bmjopen-2022-068797 (PMC9677017; doi:10.1136/bmjopen-2022-068797), 2022-11-16
Supplement: bmjopen-2022-068797.draft_revisions.pdf [file bmjopen-2022-068797.draft_revisions.pdf]

# BMJ Open

BMJ Open is committed to open peer review. As part of this commitment we make the peer review history of every article we publish publicly available.

When an article is published we post the peer reviewers' comments and the authors' responses online. We also post the versions of the paper that were used during peer review. These are the versions that the peer review comments apply to.

The versions of the paper that follow are the versions that were submitted during the peer review process. They are not the versions of record or the final published versions. They should not be cited or distributed as the published version of this manuscript.

BMJ Open is an open access journal and the full, final, typeset and author-corrected version of record of the manuscript is available on our site with no access controls, subscription charges or pay-per-view fees (<http://bmjopen.bmj.com>).

If you have any questions on BMJ Open's open peer review process please email [info.bmjopen@bmj.com](mailto:info.bmjopen@bmj.com)

# BMJ Open

## Identifying relative efficacy of components of prehabilitation in adult surgical patients: protocol for a systematic review and component network meta-analysis

|                               |                                                                                                                                                                                                                                                                                                                                                                                                                                                                                                                                                                                                                                                                                                                                                                                                                                                                                                                                                                                                                                                                                                                                                                                                                                                                                               |
|-------------------------------|-----------------------------------------------------------------------------------------------------------------------------------------------------------------------------------------------------------------------------------------------------------------------------------------------------------------------------------------------------------------------------------------------------------------------------------------------------------------------------------------------------------------------------------------------------------------------------------------------------------------------------------------------------------------------------------------------------------------------------------------------------------------------------------------------------------------------------------------------------------------------------------------------------------------------------------------------------------------------------------------------------------------------------------------------------------------------------------------------------------------------------------------------------------------------------------------------------------------------------------------------------------------------------------------------|
| Journal:                      | <i>BMJ Open</i>                                                                                                                                                                                                                                                                                                                                                                                                                                                                                                                                                                                                                                                                                                                                                                                                                                                                                                                                                                                                                                                                                                                                                                                                                                                                               |
| Manuscript ID                 | bmjopen-2022-068797                                                                                                                                                                                                                                                                                                                                                                                                                                                                                                                                                                                                                                                                                                                                                                                                                                                                                                                                                                                                                                                                                                                                                                                                                                                                           |
| Article Type:                 | Protocol                                                                                                                                                                                                                                                                                                                                                                                                                                                                                                                                                                                                                                                                                                                                                                                                                                                                                                                                                                                                                                                                                                                                                                                                                                                                                      |
| Date Submitted by the Author: | 29-Sep-2022                                                                                                                                                                                                                                                                                                                                                                                                                                                                                                                                                                                                                                                                                                                                                                                                                                                                                                                                                                                                                                                                                                                                                                                                                                                                                   |
| Complete List of Authors:     | <p>McIsaac, Daniel; University of Ottawa, Department of Anesthesiology and Pain Medicine; Ottawa Hospital Research Institute, Clinical Epidemiology Program</p> <p>Hutton, Brian; University of Ottawa, School of Epidemiology, Public Health and Preventive Medicine; Ottawa Hospital Research Institute, Clinical Epidemiology Program</p> <p>Veroniki, Areti; St Michael's Hospital, Knowledge Translation Program</p> <p>Gill, Marlyn; Patient Partner</p> <p>Boland, L.; Ottawa Hospital Research Institute, Centre for Practice-Changing Research</p> <p>Branje, Karina; University of Ottawa, Department of Anesthesiology and Pain Medicine; Ottawa Hospital Research Institute, Clinical Epidemiology Program</p> <p>Grudzinski, Alexa L; University of Ottawa, Department of Anesthesiology and Pain Medicine</p> <p>Hladkowitz, Emily; Ottawa Hospital, Departments of Anesthesiology and Pain Medicine; Ottawa Hospital Research Institute, Clinical Epidemiology Program</p> <p>Shaw, Julia; University of Ottawa, Department of Anesthesiology and Pain Medicine; Ottawa Hospital Research Institute, Clinical Epidemiology Program</p> <p>Gillis, Chelsia; McGill University, School of Human Nutrition</p> <p>The Prehabilitation Knowledge Network, Group Authorship; NA</p> |
| Keywords:                     | SURGERY, Quality in health care < HEALTH SERVICES ADMINISTRATION & MANAGEMENT, REHABILITATION MEDICINE                                                                                                                                                                                                                                                                                                                                                                                                                                                                                                                                                                                                                                                                                                                                                                                                                                                                                                                                                                                                                                                                                                                                                                                        |
|                               |                                                                                                                                                                                                                                                                                                                                                                                                                                                                                                                                                                                                                                                                                                                                                                                                                                                                                                                                                                                                                                                                                                                                                                                                                                                                                               |

SCHOLARONE™  
Manuscripts

1  
2  
3 **Identifying relative efficacy of components of prehabilitation in adult surgical patients: protocol for**  
4 **a systematic review and component network meta-analysis**  
5

6 **Corresponding Author: Daniel I McIsaac MD, MPH, FRCPC**

7 Associate Professor of Anesthesiology and Pain Medicine, University of Ottawa

8 Associate Scientist, Ottawa Hospital Research Institute

9 Email: [dmcisaac@toh.ca](mailto:dmcisaac@toh.ca)

10 Phone-613-761-4940/Fax-613-761-5209

11 Department of Anesthesiology, The Ottawa Hospital Civic Campus

12 Room B311, 1053 Carling Ave

13 Ottawa, ON K1Y 4E9

14 **Authors:** McIsaac, Daniel I MD, MPH, FRCPC<sup>1,2,3\*</sup>; Hutton, Brian PhD<sup>2,3</sup>; Veroniki, Areti Angeliki  
15 PhD<sup>4</sup>; Gill, Marlyn MSW<sup>5</sup>; Boland, Laura SLP(c), PhD<sup>6</sup>; Branje, Karina MSc<sup>1,2</sup>; Grudzinski, Alexa L  
16 MD<sup>1</sup>; Hladkiewicz, Emily MA.Ed<sup>1,2</sup>; Shaw, Julia MSc<sup>1,2</sup>; Gillis, Chelsia RD, PhD<sup>7</sup>; the Prehabilitation  
17 Knowledge Network Authorship Group\*

18 **Affiliations:**

19 **1** Department of Anesthesiology and Pain Medicine, University of Ottawa, Ottawa, Canada

20 **2** Clinical Epidemiology Program, the Ottawa Hospital Research Institute, Ottawa, Canada

21 **3** School of Epidemiology & Public Health, University of Ottawa, Ottawa, Canada

22 **4** Knowledge Translation Program, Li Ka Shing Knowledge Institute, St Michael's Hospital, Toronto,  
23 Canada

24 **5** Patient Partner, Calgary, Canada

25 **6** Centre for Practice-Changing Research, Ottawa Hospital Research Institute, Ottawa, Canada

26 **7** Department of Human Nutrition, McGill University, Montreal, Canada

27 **\*Individual collaborators with group authorship:** Shamsuddin Akhtar, Marlis Atkins, Sylvie Aucoin,

28 Rebecca Auer, Carlota Basualdo-Hammond, Paul Beaulieu, Mary Brindle, Gregory Bryson, Franco Carli,

29 Antoine Eskander, Dean Fergusson, Julio F Fiore Jr., Alan Forster, Melani Gillam, Leah Gramlich, Jayna

30 Holroyd-Leduc, Timothy Jackson, Rachel Khadaroo, Manoj Lalu, Cameron Love, Guillaume Martel,

31 Colin McCartney, Dolores McKeen, Amanda Meliambro, Husein Moloo, Ronald Moore, John

32 Muscedere, Julie Nantel, Stephane Poitras, Celena Scheede-Bergdahl, Risa Shorr, Monica Taljaard, Tom

33 Wallace, Duminda Wijeyesundera

34 **Word count:** 2784

## ABSTRACT

**Introduction:** Prehabilitation is a high-priority intervention for patients, the public, clinicians, and health systems. However, existing knowledge syntheses are generally low quality and do not provide insights regarding the relative efficacy of different prehabilitation components (e.g., exercise, nutrition, psychosocial or cognitive interventions). The objective of the planned review is to evaluate the relative efficacy of different prehabilitation components to inform current care, implementation, and future research.

**Methods and analysis:** We will perform a systematic review and component network meta-analysis (CNMA). We will use a peer-reviewed search strategy to identify all randomized trials of prehabilitation in adult surgical patients from Ovid Medline, Embase, the CINAHL, PsychINFO, Web of Science, and the Cochrane Central Register of Controlled Trials, along with grey literature. All stages of the review and data extraction process will be performed in duplicate following recommended best practices. To compare the relative efficacy of different prehabilitation components (prespecified as exercise, nutrition, psychosocial or cognitive interventions), we will use CNMA, an extension of network meta-analysis that allows estimation of the contributions to efficacy of each component of a multicomponent intervention through direct and indirect comparisons. We will use additive CNMA models for critical outcomes (post-operative complications, patient-reported recovery, physical recovery, and length of stay); standard care will be the common reference condition. Pre-specified sensitivity and subgroup analyses will be conducted.

**Ethics and dissemination:** This review of published data does not require ethical review. Results will be disseminated via scientific conferences, peer reviewed publications, social and traditional media and via our research network to target partners and organizations.

1  
2  
3  
4  
5  
6 **Strengths and limitations of this study**  
7

8  
9 -A prespecified protocol based on best practices for systematic review and meta-analysis will guide  
10  
11 conduct of the study  
12

13  
14 -All stages of the study will be done in collaboration with patient and knowledge user partners so that  
15  
16 findings will be co-produced in an integrated knowledge translation framework  
17

18  
19 -Component network meta-analysis will allow comparison of the relative efficacy of different  
20  
21 prehabilitation components, even when multiple components are delivered simultaneously  
22

23  
24 -If assumptions underlying component network meta-analysis are not met, we may be unable to estimate  
25  
26 relative efficacy of different components  
27  
28  
29  
30  
31  
32  
33  
34  
35  
36  
37  
38  
39  
40  
41  
42  
43  
44  
45  
46  
47  
48  
49  
50  
51  
52  
53  
54  
55  
56  
57  
58  
59  
60

## Introduction

Globally, >300 million surgical procedures are performed each year.<sup>1,2</sup> These surgeries mostly occur on a planned (also referred to as ‘elective’) basis,<sup>3</sup> meaning that wait-times can be positively leveraged to optimize patient status prior to surgery. Patient optimization is critical in supporting high value surgical care as adverse postoperative events that matter to patients and the healthcare system are common.<sup>4</sup> Complications such as cardiopulmonary events, infections and major bleeding occur in 10-20% of patients.<sup>5-7</sup> Impaired functional recovery or new clinically significant disability develop in more than 1 in 5 surgical patients; such adverse events are even more common amongst older patients and those with poor baseline health.<sup>8-12</sup> Effective strategies to improve outcomes for the millions of people having surgery each year are urgently needed.

Prehabilitation is a process undertaken in advance of surgery, which has the specific intent of improving an individual’s functional, physiologic, cognitive and/or mental health status through targeted interventions.<sup>13,14</sup> Patients, the public, and international specialty societies identify prehabilitation as a high priority intervention, including multiple James Lind Alliance priority setting partnerships.<sup>15-17</sup> However, despite the face validity and enthusiasm for prehabilitation interventions, a recently completed umbrella review of 55 prehabilitation systematic reviews found that existing evidence synthesis is insufficient to inform practice.<sup>18</sup> Several key knowledge gaps preclude translation of current evidence into practice. First, existing systematic reviews have major methodologic shortcomings; 51 of 55 prehabilitation reviews synthesized in a recent umbrella review were rated as low quality.<sup>18,19</sup> Second, prehabilitation interventions are heterogeneous, as they may consist of different components, including exercise, nutrition, psychosocial and cognitive interventions, or combinations thereof.<sup>18</sup> Existing prehabilitation reviews have typically focused only on single component interventions, or pooled all types of prehabilitation components or interventions together. This means that patients, clinicians, researchers, and health system planners are unable to determine what specific components, or combinations of components, contribute the most to prehabilitation efficacy and deserve the greatest focus in implementation and future research.

1  
2  
3 Understanding how the current evidence network can be leveraged to detect differences between the effects  
4 of interventions and their individual components would help to address these important gaps.  
5

6  
7 Component network meta-analysis (CNMA), an extension to network meta-analysis, allows  
8 estimation of separate effects for each component of a multicomponent intervention through direct and  
9 indirect comparison, even when these are delivered in combination.<sup>20,21</sup> We propose a CNMA based on an  
10 up-to-date, high-quality systematic review, to address important knowledge gaps in the prehabilitation  
11 evidence base. Our objective is to estimate which prehabilitation components contribute the greatest  
12 efficacy in improving critical outcomes, including postoperative complication rates, patient-reported  
13 recovery, physical recovery, and length of stay in adult patients preparing for surgery.  
14  
15  
16  
17  
18  
19  
20  
21  
22  
23  
24  
25  
26  
27  
28  
29  
30  
31  
32  
33  
34  
35  
36  
37  
38  
39  
40  
41  
42  
43  
44  
45  
46  
47  
48  
49  
50  
51  
52  
53  
54  
55  
56  
57  
58  
59  
60

## Methods

### *Design*

This study will be a systematic review with CNMA. This protocol has been prepared in consideration of the Preferred Reporting Items for Systematic review and Meta-Analysis Protocols (PRISMA-P) guidelines, the PRISMA extension for network meta-analysis, and specific considerations for CNMA.<sup>22–24</sup> Methods for the review are directly informed by the Cochrane Handbook and Methodological Expectations of Cochrane Intervention Reviews (MECIR).<sup>25,26</sup> Findings will be reported according to PRISMA guidance.<sup>23,27,28</sup> Any deviations from our prespecified methodology will be described in the final report (with rationale).<sup>29</sup> The protocol has been submitted for registration to the International Prospective Register of Systematic Reviews (PROSPERO).

### *Patient and public involvement*

This review will be conducted and co-produced with partners using an integrated knowledge translation (iKT) framework.<sup>30–32</sup> Specifically, patients who will be impacted by the research and knowledge users who will implement evidence in practice have been, and will continue to be, regularly engaged through meetings, surveys and one-on-one discussions. A start-up meeting occurred June 3<sup>rd</sup>, 2022; mid-study, post-synthesis and wrap up team meetings will also be held to ensure meaningful input can be obtained throughout the course of the study. Patient and public involvement will be reported according to the Guidance for Reporting Involvement of Patients and the Public-2 checklist.<sup>33</sup>

### *Intervention definition*

A prehabilitation intervention is intended to improve physical, physiologic, cognitive or psychosocial function and to correct deficiencies in these domains in advance of surgery.<sup>13,14</sup> We will define and operationalize the following working definition of prehabilitation based on consistent descriptions of prehabilitation provided in the literature: a unimodal intervention consisting of exercise (e.g., aerobic, strength or flexibility focused interventions), nutrition (e.g., advice, supplementation or other interventions to improve oral or enteral macro or micronutrient intake), cognitive (e.g., interventions to improve or maintain cognitive function), or psychosocial (e.g., interventions to improve mood, affect or motivation)



1  
2  
3 training, or a multimodal intervention that combines exercise, nutrition, cognitive, and/or psychosocial  
4 training with or without other interventions, undertaken for 7 or more days before surgery.<sup>13,34–36</sup> No  
5 limitations will be placed on duration, location or supervisory approaches to the prehabilitation intervention.  
6  
7 For the purposes of CNMA, intervention components will be classified as: exercise, nutrition, cognitive or  
8 psychosocial. The reference category will be standard care, which is the most common comparator in  
9 existing randomized trials and meta-analyses of prehabilitation.<sup>18</sup>  
10  
11  
12  
13  
14  
15  
16  
17

### 18 *Inclusion criteria*

19  
20 Selection criteria will be informed by our Population-Intervention-Comparator-Outcome question.  
21  
22 We will include randomized trials addressing a population of adults ( $\geq 18$  years; provision of pediatric  
23 surgical care is substantively different from adults) undergoing major elective surgery where participants  
24 were exposed to a prehabilitation intervention prior to surgery compared to individuals receiving standard  
25 care or a different prehabilitation intervention (e.g., another prehabilitation intervention consisting of  
26 different components) reporting prespecified outcomes (see *Outcomes* section below).  
27  
28  
29  
30  
31  
32

### 33 *Exclusion criteria*

34  
35 Studies evaluating isolated preoperative risk factor management (e.g., smoking cessation, anemia  
36 treatment, medication management in isolation), or interventions applied immediately ( $\leq 7$  days) before  
37 surgery (a time frame consistent with enhanced recovery after surgery)<sup>37,38</sup> will be excluded to be consistent  
38 with accepted definitions of prehabilitation.<sup>18</sup> No language exclusions will be applied. Quasi experimental  
39 and other non-randomized designs will be excluded.  
40  
41  
42  
43  
44

### 45 *Outcomes*

46  
47 Consultation with partners (patients, clinicians, health system leaders, scientists) and a recent  
48 umbrella review performed by our team informed pre-specification of outcomes.<sup>18</sup> This led to the choice of  
49 critical and exploratory outcomes that are prioritized by knowledge users and that will be adequately  
50 reported in prehabilitation trials. Critical outcomes include: 1) a composite of any postoperative medical or  
51 surgical complications during the index hospitalization or within 30 days (a core outcome in surgery and  
52  
53  
54  
55  
56  
57  
58  
59  
60

1  
2  
3 perioperative medicine<sup>39,40</sup>) as it is a key step on the causal pathway between prehabilitation and improved  
4 recovery after surgery,<sup>10</sup> and is the most commonly reported outcome in prehabilitation RCTs;<sup>36</sup> 2) patient-  
5 reported recovery (e.g., disability or quality of life; most distal reported measure up to 90-days after  
6 surgery); 3) physical recovery (e.g., 6-minute walk test, short physical performance battery; most distal  
7 reported measure up to 90-days after surgery); and 4) length of hospital stay (LoS). Exploratory outcomes  
8 will be organized per the Institute for Healthcare Improvement Triple Aim domains, and will include health  
9 (non-home discharge, mortality), experience (pain, satisfaction), and resource use (costs).<sup>36,41,42</sup> These  
10 exploratory outcomes will be analyzed if adequate data and resources are available.  
11  
12  
13  
14  
15  
16  
17  
18  
19

### 20 *Search strategy*

21  
22 Our search strategy (Supplementary file 1) has been developed with our team's information  
23 specialist, and has undergone the Peer Review of Electronic Search Strategies (PRESS) review process with  
24 a second, independent information specialist.<sup>43</sup> Grey literature sources will be searched.<sup>26,44</sup> We will  
25 translate and apply our search strategy to Ovid Medline, Embase, the CINAHL, PsychINFO, Web of  
26 Science, and the Cochrane CENTRAL Register of Controlled Trials. We will assess reference lists of  
27 included trials and related reviews to identify citations missed by our search.  
28  
29  
30  
31  
32  
33

### 34 *Study review and selection*

35  
36 All stages of the review will be conducted in duplicate by two independent reviewers using Distiller  
37 SR (Evidence Partners, Ottawa, Canada). At each stage of the review, the first 50 citations will be assessed,  
38 followed by a meeting of reviewers with study leads to review decisions, identify any issues related to  
39 disagreements and/or interpretation of selection criteria, and recalibrate reviewers' approaches as needed.  
40 The first stage will include title and abstract review. After full text review by two independent authors, any  
41 conflicts will be resolved through consensus in a meeting between study leads and reviewers; reasons for  
42 exclusion at full text review will be documented and provided in the final publication.  
43  
44  
45  
46  
47  
48  
49  
50

### 51 *Data extraction*

52  
53 Data will be extracted using a form specifically designed for this review following a piloting  
54 exercise by the review team. Key to the implementation of CNMA as our analytic approach, we will collect  
55  
56  
57  
58  
59  
60

1  
2  
3 full descriptions of comparator conditions (e.g., standard care, other prehabilitation interventions). All data  
4 will be extracted in duplicate; disagreements will be resolved by reviewers through cooperative review of  
5 the primary source with a study lead. A full description of all anticipated data points is included in  
6 Supplementary file 2. Sample size, population characteristics, and missing data will be collected for each  
7 trial. For binary outcomes, we will collect the 2x2 table, event rates and/or effect measures (e.g., odds ratios  
8 or risk ratios) along with a measure of uncertainty (e.g., 95% confidence intervals [CIs], p-values). For  
9 continuous outcomes we will collect means and standard deviations, and/or effect estimates such as mean  
10 differences along with their 95% CIs and p-values. Any missing data will be sought directly from study  
11 authors.  
12  
13  
14  
15  
16  
17  
18  
19  
20  
21

### 22 *Assessment of bias in included studies*

23  
24 The Cochrane Risk of Bias 2 tool will be applied in duplicate to each included RCT<sup>45</sup> to assess  
25 within-study bias of the included evidence. Where  $\geq 10$  studies are available in a meta-analysis, funnel plots  
26 and Egger's test will be used to assess for possible publication bias and small-study effects.<sup>46</sup>  
27  
28  
29

### 30 *Assessment of certainty of evidence*

31  
32 We will use the GRADE working group classification to assess the certainty of evidence for each  
33 outcome,<sup>47</sup> including modifications specific to certainty assessment in network meta-analysis.<sup>48</sup> This will  
34 allow us to categorize evidence as high/moderate/low/very-low certainty, which will be reported using  
35 appropriate statements.<sup>49</sup>  
36  
37  
38  
39  
40

### 41 *Intervention effect estimates*

42  
43 Pooled effect estimates will be reported as odds ratios (binary outcomes), mean differences  
44 (continuous outcomes on a single scale (e.g., LoS)), or standardized mean differences (SMDs) (continuous  
45 outcomes on multiple scales (e.g., functional recovery)); point estimates along with 95% CIs will be  
46 reported. Where SMDs are calculated from different scales that capture related conceptual outcomes (e.g.,  
47 patient-reported recovery via quality of life or disability scales), directionality will be standardized prior to  
48 analysis. Where multiple scales that reflect functional recovery are reported within a single included study,  
49 we will preferentially select for pooling generic (vs. disease specific) scales to enhance generalizability,  
50  
51  
52  
53  
54  
55  
56  
57  
58  
59  
60

1  
2  
3 and quality of life (vs. other concepts) scales, as our previous work demonstrates that quality of life is  
4 reported far more frequently in prehabilitation studies than related measures like disability.<sup>18</sup> Where  
5 continuous outcome measures are not reported as means and standard deviations, we will use the methods  
6 of Wan and colleagues to estimate means and standard deviations from reported measures such as medians  
7 and interquartile or overall ranges.<sup>50</sup> Effect estimates derived from cluster randomized trials will be pooled  
8 using the reported effect adjusted for clustering, or if not available, a corrected estimate accounting for an  
9 estimated design effect.<sup>51</sup>

### 18 *Data syntheses and analyses*

19  
20 Our approach to analysis will follow previous recommendations, whereby sequential and  
21 complimentary techniques will be used to estimate the pooled effects of prehabilitation and its  
22 components.<sup>20,52</sup>

### 26 Pairwise meta-analysis

27  
28 Pair-wise meta-analysis will first be used to estimate whether any prehabilitation intervention, or  
29 prespecified components (exercise, nutrition, psychosocial or cognitive) improve critical outcomes  
30 compared to standard care or comparator interventions (separately). All meta-analysis models will use  
31 random-effects, as existing knowledge suggests that assumptions for fixed-effect meta-analysis will not be  
32 met (in particular due to heterogeneity related to different surgical procedures).<sup>18</sup> We will use the Hartung-  
33 Knapp-Sidik-Jonkman method to derive appropriate CIs.<sup>53</sup> Between-study variance will be estimated using  
34 the restricted maximum likelihood method and its 95% CI using the Q-profile approach.<sup>54-56</sup> We will also  
35 calculate the  $I^2$  statistic to quantify the percentage of variability due to between-study heterogeneity rather  
36 than random error. If substantial heterogeneity exists, sources will be explored using subgroup analysis and  
37 meta-regression, based on prespecified postulated effect modifiers (type of surgery, age, type of  
38 prehabilitation, baseline functional status).

### 51 Assessment of assumptions for NMA and CNMA

52  
53 We will assess for transitivity (the assumption that two components can be validly compared via  
54 common control condition) both visually and statistically. Visual evaluation will be conducted via  
55  
56  
57  
58  
59

1  
2  
3 assessment of the distribution of effect modifiers in tabular and graphical presentations across treatment  
4 comparisons. We will visually inspect similarity of the distribution of the following effect modifiers: type  
5 of surgery, age, baseline functional status, comorbidity or American Society of Anesthesiologists' Score,  
6 presence of cancer, presence of malnutrition. Statistical assessment of transitivity will involve a global  
7 assessment of consistency using the design-by-treatment interaction model,<sup>57</sup> and a local assessment  
8 through the node-splitting approach.<sup>58</sup> For the CNMA, we will assess the additivity assumption using the  
9 method of Rucker and colleagues based on the difference in Q statistics between the additive CNMA and  
10 standard NMA model.<sup>24</sup>  
11  
12  
13  
14  
15  
16  
17  
18  
19  
20  
21

### 22 Network meta-analysis

23  
24 Next, we will conduct a standard NMA, also referred to as a full interaction model in CNMA,<sup>20</sup> and  
25 generate network plots to visually explore the available evidence base. We will perform a random-effects  
26 NMA assuming a common between-studies variance ( $\tau^2$ ) across the whole network, using the restricted  
27 maximum likelihood method.<sup>59</sup> We will estimate summary effect measures (odds ratios, mean differences,  
28 weighted mean differences) along with 95% CIs and 95% prediction intervals. To assess the magnitude of  
29 heterogeneity we will compare the estimated  $\tau^2$  with an empirical distribution for dichotomous data.<sup>60</sup> We  
30 will obtain a treatment hierarchy using P-scores, which take values between 0 and 1, and which is based on  
31 the estimated treatment effects and their associated uncertainty.<sup>61</sup>  
32  
33  
34  
35  
36  
37  
38  
39  
40  
41  
42

### 43 Component network meta-analysis

44  
45 We will use an additive CNMA model to evaluate the influence of the individual components,  
46 where each component has its own effect, and the total effect of an intervention will be equal to the sum of  
47 the relative component effects. It should be noted that common components in comparisons of interventions  
48 cancel out (i.e., *mean difference*<sub>A + B vs. A + C</sub> is identical to the effect of *mean difference*<sub>B vs. C</sub>).  
49  
50  
51  
52

### 53 Model Implementation

1  
2  
3 All analyses will be performed in the R programming language (R Foundation for Statistical  
4 Computing, Vienna, Austria). We will fit pair-wise meta-analysis models in R using the *meta* package,<sup>62</sup>  
5 and will conduct all NMA, CNMAs, design-by-treatment interaction models, node-splitting models,  
6  
7 subgroup and sensitivity analyses in R using the *netmeta* package.<sup>63</sup>  
8  
9

### 10 11 *Sensitivity analyses*

12  
13 If adequate data are available and network geometry is not substantively changed, we will re-  
14 estimate our additive CNMA models limited to low risk of bias trials only.  
15

16  
17 While we have prespecified, based on prior umbrella review, exercise, nutrition, psychosocial and  
18 cognitive interventions as the components that we will compare using CNMA, theoretically each  
19 component can be further subdivided. If adequate data are available, we will explore CNMA analyses by  
20 subcomponent (e.g., exercise: aerobic, strength, other; nutrition: supplementation, counselling, other;  
21 psychosocial: anxiety reduction, mood stabilization, other; although ultimately some subcomponents listed  
22 here may require further merging or disaggregation based on their distribution between studies) to further  
23 refine our understanding of intervention component efficacy. If missing data are present and unaccounted  
24 for in primary reports, we will complete sensitivity analyses using appropriate techniques to impute missing  
25 values and assess consistency between primary and imputed results.  
26  
27  
28  
29  
30  
31  
32  
33  
34  
35

### 36 37 *Dissemination*

38  
39 Results will be disseminated through presentations at scientific conferences and submission of  
40 peer-reviewed manuscripts. Using our iKT approach, we will also perform targeted dissemination to partner  
41 organizations and via our investigator network. Social and traditional media will also be used to spread  
42 results to a larger audience.  
43  
44  
45  
46

### 47 48 **Limitations**

49  
50 Component network meta-analysis requires specific assumptions and acknowledgement of  
51 limitations. Assumptions underlying CNMA are similar to those of network meta-analyses,<sup>64</sup> and will  
52 require assessment prior to analysis. Because network comparisons (direct and indirect) depend upon a  
53 common reference condition (i.e., standard care), detailed description of standard care conditions in existing  
54  
55  
56  
57  
58  
59

1  
2  
3 trials will be described to allow meaningful clinical interpretation of results. Should assumption-violating  
4 differences between RCTs be identified, we will incorporate baseline risk meta-regression (i.e., control rate  
5 meta-regression) in our analyses.<sup>65</sup> Some indirect (i.e., via the standard care reference condition)  
6 comparisons may not be possible due to a lack of relevant RCT comparators. We have defined our  
7 components as exercise, nutrition, psychosocial and cognitive. However, we recognize that these  
8 components could be subdivided further, and have therefore pre-specified exploratory investigation of sub-  
9 components (e.g., strength vs aerobic exercise) should adequate data be available. Sparse data can also limit  
10 the power to detect meaningful differences, especially in CNMA models with interactions and for meta-  
11 regression.<sup>20,66,67</sup>

## 22 **Conclusion**

23  
24 Prehabilitation is a promising and high-priority intervention from the perspective of patients, the  
25 public, clinicians, scientists, and health systems. The proposed review will provide a high-quality synthesis  
26 of all prehabilitation trials. Use of CNMA will allow estimation of the relative efficacy of different  
27 prehabilitation components. The findings will directly inform current care, health system implementation  
28 and design of future interventions and trials.  
29  
30  
31  
32  
33  
34  
35  
36  
37  
38  
39  
40  
41  
42  
43  
44  
45  
46  
47  
48  
49  
50  
51  
52  
53  
54  
55  
56  
57  
58  
59  
60

1  
2  
3  
4 **Collaborators:** Prehabilitation Knowledge Network: Shamsuddin Akhtar, Marlis Atkins, Sylvie Aucoin,  
5 Rebecca Auer, Carlota Basualdo-Hammond, Paul Beaulé, Mary Brindle, Gregory Bryson, Franco Carli,  
6 Antoine Eskander, Dean Fergusson, Julio Fiore Jr., Alan Forster, Melani Gillam, Leah Gramlich, Jayna  
7 Holroyd-Leduc, Timothy Jackson, Rachel Khadaroo, Manoj Lalu, Cameron Love, Guillaume Martel,  
8 Colin McCartney, Dolores McKeen, Amanda Meliambro, Husein Moloo, Ronald Moore, John  
9 Muscedere, Julie Nantel, Stephane Poitras, Celena Scheede-Bergdahl, Risa Shorr, Monica Taljaard, Tom  
10 Wallace, Duminda Wijeyesundera  
11

12  
13 Please include the collaborator listing on the manuscript and associated pubmed citation.

14  
15 **Author's Contributions:** DIM is the Principal Investigator. DIM, MG, LB, BH, AA, CG, KB, ALG, JS,  
16 and EH were involved in the conception and design of the study. DIM wrote the initial draft of the  
17 protocol and this manuscript. All authors provided critical input regarding the design of the study. DM,  
18 BH, and AA designed the data analysis plan. All authors revised the protocol critically for important  
19 intellectual content and approved the final version to be published. DIM, MG, LB, BH, AA, CG, KB,  
20 ALG, JS, and EH agree to be accountable for all aspects of the work in ensuring that questions related to  
21 the accuracy or integrity of any part of the work are appropriately investigated and resolved. All authors,  
22 including the Prehabilitation Knowledge Network, have critically reviewed and approved the final  
23 protocol.  
24

25  
26 **Funding Statement:** This work was supported by The Canadian Institutes of Health Research [179837].  
27

28 **Competing Interests Statement:** There are no competing interests to declare.  
29

30 **Acknowledgements:** DIM receives salary support from The Ottawa Hospital Anesthesia Alternate Funds  
31 Association and a Research Chair from the University of Ottawa Faculty of Medicine.  
32  
33  
34  
35  
36  
37  
38  
39  
40  
41  
42  
43  
44  
45  
46  
47  
48  
49  
50  
51  
52  
53  
54  
55  
56  
57  
58  
59  
60



## References

1. Meara JG, Leather AJM, Hagander L, et al. Global Surgery 2030: evidence and solutions for achieving health, welfare, and economic development. *Lancet*. 2015;386(9993):569-624. doi:10.1016/S0140-6736(15)60160-X
2. Shrime MG, Bickler SW, Alkire BC, Mock C. Global burden of surgical disease: an estimation from the provider perspective. *Lancet Glob Heal*. 2015;3 Suppl 2:S8-9. doi:10.1016/S2214-109X(14)70384-5
3. *Number, Percentage and Average Acute Length of Stay for Top 10 High-Volume Inpatient Surgeries by Province/Territory, HMDB, 2015–2016.*; 2017. <https://www.cihi.ca/en/quick-stats>
4. Shaw J, Beasley E, Hladkowicz E, et al. A survey of older people after major surgery: Prioritization of routine and patient-reported postoperative outcome measures. In: *Ottawa Quality & Patient Safety Conference.* ; 2018.
5. Devereaux PJ, Chan MT V, Alonso-Coello P, et al. Association between postoperative troponin levels and 30-day mortality among patients undergoing noncardiac surgery. *JAMA*. 2012;307(21):2295-2304. doi:10.1001/jama.2012.5502
6. Wijesundera DN, Pearse RM, Shulman MA, et al. Assessment of functional capacity before major non-cardiac surgery: an international, prospective cohort study. *Lancet (London, England)*. 2018;391(10140):2631-2640. doi:10.1016/S0140-6736(18)31131-0
7. Pearse RM, Moreno RP, Bauer P, et al. Mortality after surgery in Europe: a 7 day cohort study. *Lancet*. 2012;380(9847):1059-1065. doi:10.1016/S0140-6736(12)61148-9
8. Etzioni DA, Liu JH, Maggard MA, Ko CY. The aging population and its impact on the surgery workforce. *Ann Surg*. 2003;238(2):170-177. doi:10.1097/01.SLA.0000081085.98792.3d
9. Fowler AJ, Abbott TEF, Prowle J, Pearse RM. Age of patients undergoing surgery. *Br J Surg*. 2019;106(8):1012-1018. doi:10.1002/bjs.11148
10. Berian JR, Mohanty S, Ko CY, Rosenthal RA, Robinson TN. Association of Loss of Independence

- 1  
2  
3 With Readmission and Death After Discharge in Older Patients After Surgical Procedures. *JAMA*  
4 *Surg.* 2016;151(9):e161689. doi:10.1001/jamasurg.2016.1689  
5  
6  
7  
8 11. McIsaac DI, Taljaard M, Bryson GL, et al. Frailty as a Predictor of Death or New Disability After  
9 Surgery: A Prospective Cohort Study. *Ann Surg.* 2020;271(2):283-289.  
10  
11 doi:10.1097/SLA.0000000000002967  
12  
13  
14 12. Shulman MA, Myles PS, Chan MT V., McIlroy DR, Wallace S, Ponsford J. Measurement of  
15 Disability-free Survival after Surgery. *Anesthesiology.* 2015;122(3):524-536.  
16  
17 doi:10.1097/ALN.0000000000000586  
18  
19  
20 13. Minnella EM, Carli F. Multi-modal prehabilitation : addressing the why , when , what , how , who  
21 and where next ? 2019;74:20-26. doi:10.1111/anae.14505  
22  
23  
24 14. Carli F, Ferreira V. Prehabilitation: a new area of integration between geriatricians,  
25 anesthesiologists, and exercise therapists. *Aging Clin Exp Res.* 2018;30(3):241-244.  
26  
27 doi:10.1007/s40520-017-0875-8  
28  
29  
30 15. The Anaesthesia and Perioperative Care Priority Setting Partnership. Published 2015. Accessed  
31 August 27, 2015. <http://niaa.org.uk/Results#pt>  
32  
33  
34 16. *The Top 10 Are:*; 2019. Accessed February 11, 2020. <https://www.car-psp.ca/top-10>  
35  
36  
37 17. *Strong for Surgery.* [https://www.facs.org/quality-programs/strong-for-](https://www.facs.org/quality-programs/strong-for-surgery/patients/prehabilitation)  
38 [surgery/patients/prehabilitation](https://www.facs.org/quality-programs/strong-for-surgery/patients/prehabilitation)  
39  
40  
41 18. McIsaac DI, Gill M, Boland L, et al. Prehabilitation in adult patients undergoing surgery: an  
42 umbrella review of systematic reviews. *Br J Anaesth.* 2022;128(2):244-257.  
43  
44 doi:10.1016/j.bja.2021.11.014  
45  
46  
47 19. Shea BJ, Reeves BC, Wells G, et al. AMSTAR 2: a critical appraisal tool for systematic reviews  
48 that include randomised or non-randomised studies of healthcare interventions, or both. *BMJ.*  
49  
50 Published online September 21, 2017;j4008. doi:10.1136/bmj.j4008  
51  
52  
53 20. Welton NJ, Caldwell DM, Adamopoulos E, Vedhara K. Mixed treatment comparison meta-  
54 analysis of complex interventions: Psychological interventions in coronary heart disease. *Am J*  
55  
56  
57  
58  
59

- 1  
2  
3 *Epidemiol.* 2009;169(9):1158-1165. doi:10.1093/aje/kwp014  
4  
5 21. Caldwell DM, Welton NJ. Approaches for synthesising complex mental health interventions in  
6 meta-analysis. *Evid Based Ment Health.* 2016;19(1):16-21. doi:10.1136/eb-2015-102275  
7  
8  
9 22. Moher D, Shamseer L, Clarke M, et al. Preferred reporting items for systematic review and meta-  
10 analysis protocols (PRISMA-P) 2015 statement. *Syst Rev.* 2015;4(1):1. doi:10.1186/2046-4053-4-  
11 1  
12  
13  
14  
15 23. Hutton B, Salanti G, Caldwell DM, et al. The PRISMA extension statement for reporting of  
16 systematic reviews incorporating network meta-analyses of health care interventions: checklist and  
17 explanations. *Ann Intern Med.* 2015;162(11):777-784. doi:10.7326/M14-2385  
18  
19  
20  
21  
22 24. Rücker G, Petropoulou M, Schwarzer G. Network meta-analysis of multicomponent interventions.  
23 *Biometrical J.* 2020;62(3):808-821. doi:10.1002/bimj.201800167  
24  
25  
26 25. Julian Higgins, Toby Lasserson, Jackie Chandler, David Tovey, James Thomas, Ella Flemyng RC.  
27 *Methodological Expectations of Cochrane Intervention Reviews (MECIR). Standards for the*  
28 *Conduct and Reporting of New Cochrane Intervention Reviews, Reporting of Protocols and the*  
29 *Planning, Conduct and Reporting of Updates.* Cochrane Collaboration; 2021.  
30  
31 <https://community.cochrane.org/mecir-manual>  
32  
33  
34  
35  
36 26. Higgins J, Thomas J, Chandler J, et al., eds. *Cochrane Handbook for Systematic Reviews of*  
37 *Interventions.* 2nd ed. John Wiley & Sons; 2019.  
38  
39  
40  
41 27. Moher D, Liberati A, Tetzlaff J, Altman DG. Preferred reporting items for systematic reviews and  
42 meta-analyses: the PRISMA statement. *PLoS Med.* 2009;6(7):e1000097.  
43  
44  
45 doi:10.1371/journal.pmed.1000097  
46  
47  
48 28. Page MJ, McKenzie JE, Bossuyt PM, et al. The PRISMA 2020 statement: An updated guideline  
49 for reporting systematic reviews. *BMJ.* 2021;372. doi:10.1136/bmj.n71  
50  
51  
52 29. Higgins J, Thomas J, Chandler J, et al., eds. *Cochrane Handbook for Systematic Reviews of*  
53 *Interventions.* 6th ed. Cochrane Collaboration; 2019.  
54  
55  
56 30. Boland L, Kothari A, McCutcheon C, Graham ID. Building an integrated knowledge translation  
57  
58  
59  
60

- (IKT) evidence base: colloquium proceedings and research direction. *Heal Res Policy Syst*. 2020;18(1):8. doi:10.1186/s12961-019-0521-3
31. Graham ID, Kothari A, McCutcheon C. Moving knowledge into action for more effective practice, programmes and policy: protocol for a research programme on integrated knowledge translation. *Implement Sci*. 2018;13(1):22. doi:10.1186/s13012-017-0700-y
32. Straus SE, Tetroe J, Graham I, eds. *Knowledge Translation in Health Care: Moving from Evidence to Practice*. 2nd ed. BMJ Publishing Group; 2013.
33. Staniszewska S, Brett J, Simera I, et al. GRIPP2 reporting checklists: tools to improve reporting of patient and public involvement in research. *BMJ*. Published online August 2, 2017;j3453. doi:10.1136/bmj.j3453
34. Gillis C, Buhler K, Bresee L, et al. Effects of Nutritional Prehabilitation, With and Without Exercise, on Outcomes of Patients Who Undergo Colorectal Surgery: A Systematic Review and Meta-analysis. *Gastroenterology*. 2018;155(2):391-410.e4. doi:10.1053/j.gastro.2018.05.012
35. Luther A, Gabriel J, Watson RP, Francis NK. The Impact of Total Body Prehabilitation on Post-Operative Outcomes After Major Abdominal Surgery: A Systematic Review. *World J Surg*. Published online 2018. doi:10.1007/s00268-018-4569-y
36. McIsaac DI, Gill M, Boland L, et al. Prehabilitation in adult surgical patients: an umbrella review of systematic reviews. *Ann Surg*. 2021;Submitted.
37. ERAS Spotlight. Alberta Health Services. Accessed February 11, 2020. <https://krs.libguides.com/surgery/eras>
38. Wind J, Polle SW, Fung Kon Jin PHP, et al. Systematic review of enhanced recovery programmes in colonic surgery. *Br J Surg*. 2006;93(7):800-809. doi:10.1002/bjs.5384
39. Bilimoria KY, Liu Y, Paruch JL, et al. Development and evaluation of the universal ACS NSQIP surgical risk calculator: a decision aid and informed consent tool for patients and surgeons. *J Am Coll Surg*. 2013;217(5):833-42.e1-3. doi:10.1016/j.jamcollsurg.2013.07.385
40. Haller G, Bampoe S, Cook T, et al. Systematic review and consensus definitions for the

- 1  
2  
3 Standardised Endpoints in Perioperative Medicine initiative: clinical indicators. *Br J Anaesth*.  
4  
5 2019;123(2):228-237. doi:10.1016/j.bja.2019.04.041  
6  
7 41. Stiefel M, Nolan K, Steifel M NK. A Guide to Measuring the Triple Aim : Population Health,  
8  
9 Experience of Care, and Per Capita Cost. IHI Innovation Series white paper.  
10  
11 42. Berwick DM, Nolan TW, Whittington J. The Triple Aim: Care, Health, And Cost. *Health Aff*.  
12  
13 2008;3(3):759-769. doi:10.1377/hlthaff.27.3.759  
14  
15 43. Sampson M, McGowan J, Lefebvre C, Moher D, Grimshaw JM. *PRESS: Peer Review of*  
16  
17 *Electronic Search Strategies*.; 2008. doi:10.1111/1540-4560.00063  
18  
19 44. CADTH. Grey matters: a practical tool for searching health-related grey literature. Published  
20  
21 2018. Accessed September 2, 2021. <https://www.cadth.ca/resources/finding-evidence>  
22  
23 45. The Cochrane Collaboration. *RoB 2 Guidance: Revised Cochrane Risk-of-Bias Tool for*  
24  
25 *Randomized Trials (RoB 2)*. (Higgins JP, Savović J, Page MJ, Sterne JA, eds.). Cochrane  
26  
27 Collaboration; 2019. [https://methods.cochrane.org/bias/resources/rob-2-revised-cochrane-risk-](https://methods.cochrane.org/bias/resources/rob-2-revised-cochrane-risk-bias-tool-randomized-trials)  
28  
29 [bias-tool-randomized-trials](https://methods.cochrane.org/bias/resources/rob-2-revised-cochrane-risk-bias-tool-randomized-trials)  
30  
31 46. Sterne JAC, Sutton AJ, Ioannidis JPA, et al. Recommendations for examining and interpreting  
32  
33 funnel plot asymmetry in meta-analyses of randomised controlled trials. *BMJ*. 2011;343.  
34  
35 doi:10.1136/bmj.d4002  
36  
37 47. Guyatt GH, Oxman AD, Vist GE, et al. GRADE: an emerging consensus on rating quality of  
38  
39 evidence and strength of recommendations. *BMJ*. 2008;336(7650):924-926.  
40  
41 doi:10.1136/bmj.39489.470347.AD  
42  
43 48. Brignardello-Petersen R, Bonner A, Alexander PE, et al. Advances in the GRADE approach to  
44  
45 rate the certainty in estimates from a network meta-analysis. *J Clin Epidemiol*. 2018;93:36-44.  
46  
47 doi:10.1016/j.jclinepi.2017.10.005  
48  
49 49. Santesso N, Glenton C, Dahm P, et al. GRADE guidelines 26: informative statements to  
50  
51 communicate the findings of systematic reviews of interventions. *J Clin Epidemiol*. 2020;119:126-  
52  
53 135. doi:10.1016/j.jclinepi.2019.10.014  
54  
55  
56  
57  
58  
59  
60

- 1  
2  
3 50. Wan X, Wang W, Liu J, Tong T. Estimating the sample mean and standard deviation from the  
4 sample size, median, range and/or interquartile range. *BMC Med Res Methodol*. 2014;14(1):135.  
5  
6 doi:10.1186/1471-2288-14-135  
7  
8  
9 51. Higgins J, Thomas J, Chandler J, et al. Cochrane Handbook for Systematic Reviews of  
10 Interventions version 6.1 (updated September 2020). *Cochrane*. Published online 2020.  
11  
12  
13 52. Rücker G, Schmitz S, Schwarzer G. Component network meta-analysis compared to a matching  
14 method in a disconnected network: A case study. *Biometrical J*. 2021;63(2):447-461.  
15  
16 doi:10.1002/bimj.201900339  
17  
18  
19 53. Veroniki AA, Jackson D, Bender R, et al. Methods to calculate uncertainty in the estimated overall  
20 effect size from a random-effects meta-analysis. *Res Synth Methods*. 2019;10(1):23-43.  
21  
22 doi:10.1002/jrsm.1319  
23  
24  
25 54. Veroniki AA, Jackson D, Viechtbauer W, et al. Methods to estimate the between-study variance  
26 and its uncertainty in meta-analysis. *Res Synth Methods*. 2016;7(1):55-79. doi:10.1002/jrsm.1164  
27  
28  
29 55. Langan D, Higgins JPT, Jackson D, et al. A comparison of heterogeneity variance estimators in  
30 simulated random-effects meta-analyses. *Res Synth Methods*. 2019;10(1):83-98.  
31  
32 doi:10.1002/jrsm.1316  
33  
34  
35 56. Viechtbauer W. Confidence intervals for the amount of heterogeneity in meta-analysis. *Stat Med*.  
36 2007;26(1):37-52. doi:10.1002/sim.2514  
37  
38  
39 57. White IR, Barrett JK, Jackson D, Higgins JPT. Consistency and inconsistency in network  
40 meta-analysis: model estimation using multivariate meta-regression. *Res Synth Methods*.  
41 2012;3(2):111-125. doi:10.1002/jrsm.1045  
42  
43  
44 58. Dias S, Welton NJ, Caldwell DM, Ades AE. Checking consistency in mixed treatment comparison  
45 meta-analysis. *Stat Med*. 2010;29(7-8):932-944. doi:10.1002/sim.3767  
46  
47  
48 59. Higgins JP, Whitehead A. Borrowing strength from external trials in a meta-analysis. *Stat Med*.  
49 1996;15(24):2733-2749. doi:10.1002/(SICI)1097-0258(19961230)15:24<2733::AID-  
50 SIM562>3.0.CO;2-0  
51  
52  
53  
54  
55  
56  
57  
58  
59  
60

- 1  
2  
3 60. Turner RM, Davey J, Clarke MJ, Thompson SG, Higgins JP. Predicting the extent of  
4 heterogeneity in meta-analysis, using empirical data from the Cochrane Database of Systematic  
5 Reviews. *Int J Epidemiol*. 2012;41(3):818-827. doi:10.1093/ije/dys041  
6  
7  
8  
9 61. Rücker G, Schwarzer G. Ranking treatments in frequentist network meta-analysis works without  
10 resampling methods. *BMC Med Res Methodol*. 2015;15:58. doi:10.1186/s12874-015-0060-8  
11  
12 62. Balduzzi S, Rücker G, Schwarzer G. How to perform a meta-analysis with R: a practical tutorial.  
13 *Evid Based Ment Health*. 2019;22(4):153-160. doi:10.1136/ebmental-2019-300117  
14  
15 63. Schwarzer G, Carpenter JR, Rücker G. *Meta-Analysis with R*. Springer International Publishing;  
16 2015. doi:10.1007/978-3-319-21416-0  
17  
18 64. Donegan S, Williamson P, D'Alessandro U, Tudur Smith C. Assessing key assumptions of  
19 network meta-analysis: a review of methods. *Res Synth Methods*. 2013;4(4):291-323.  
20 doi:10.1002/jrsm.1085  
21  
22 65. Dias S, Sutton A, Welton N, Ades A. *NICE DSU Technical Support Document 2: A Generalised*  
23 *Linear Modelling Framework for Pairwise and Network Meta-Analysis of Randomised Controlled*  
24 *Trials*.; 2011. <http://www.nicedsu.org.uk>  
25  
26 66. Melendez-Torres GJ, Bonell C, Thomas J. Emergent approaches to the meta-analysis of multiple  
27 heterogeneous complex interventions Data collection, quality, and reporting. *BMC Med Res*  
28 *Methodol*. 2015;15(1):1-7. doi:10.1186/s12874-015-0040-z  
29  
30 67. Hempel S, Miles JN V, Booth MJ, Wang Z, Morton SC, Shekelle PG. Risk of bias: a simulation  
31 study of power to detect study-level moderator effects in meta-analysis. *Syst Rev*. 2013;2:107.  
32 doi:10.1186/2046-4053-2-107  
33  
34  
35  
36  
37  
38  
39  
40  
41  
42  
43  
44  
45  
46  
47  
48  
49  
50  
51  
52  
53  
54  
55  
56  
57  
58  
59  
60

## Supplementary file 1 – Search strategies

Ovid MEDLINE(R) ALL

- 1 (prehab\* or pre-hab\*).tw,kf.
- 2 (preoperative\* rehabilitation or preoperative\* training).tw,kw.
- 3 ((perioperat\* or peri operat\*) adj3 (exercis\* or physiotherap\* or physical therapy or diet or nutrition\* or physical activit\* or counsel?ing)).tw.
- 4 Preoperative Exercise/
- 5 ((exercise\* or diet or nutrition\* counsel?ing) and (surgery or surgical)).ti.
- 6 ((preoperat\* or pre-operat\* or presurg\* or pre-surg\*) adj3 (exercis\* or physiotherap\* or physical therapy or diet or nutrition\* or physical activit\* or counsel?ing or conditioning)).tw,kf.
- 7 ((preoperat\* or pre-operat\* or presurg\* or pre-surg\*) adj5 ((psychological or psychosocial or cognitive) adj3 (intervention\* or therap\*))).tw,kf.
- 8 ((preoperat\* or pre-operat\* or presurg\* or pre-surg\*) adj5 (diet or dietary or nutrit\*)).tw,kf.
- 2008
- 9 ((preoperat\* or pre-operat\* or presurg\* or pre-surg\*) adj5 (resistance or strength or weight or muscle) adj2 training).tw,kf.
- 10 ((preoperat\* or pre-operat\* or presurg\* or pre-surg\*) adj5 (food adj3 (counsel\* or support\* or modif\*))).tw,kf.
- 11 ((preoperat\* or pre-operat\* or presurg\* or pre-surg\*) adj5 ((energy or protein) adj3 supplement\*)).tw,kf.
- 12 ((preoperat\* or pre-operat\* or presurg\* or pre-surg\*) adj5 (exercise or exercises or stretch\* or aerobic\* or physical activit\*)).tw,kf.
- 13 ((preoperat\* or pre-operat\* or presurg\* or pre-surg\*) adj5 (cbt or cognitive behavio?r\*)).tw,kf.
- 14 ((preoperat\* or pre-operat\* or presurg\* or pre-surg\*) adj2 counsel\*).tw,kf.
- 15 ((preoperat\* or pre-operat\* or presurg\* or pre-surg\*) adj2 supplement\*).tw,kf.
- 16 or/1-15
- 17 \*Preoperative Care/ or \*Preoperative Period/ or (preoperat\* or pre-operat\* or presurg\* or pre-surg\*).ti.
- 18 exp Exercise Therapy/ or Exercise/
- 19 Physical Fitness/
- 20 (exercise or exercises or stretch\* or aerobic\* or physical activit\*).tw,kw.
- 21 ((resistance or strength or weight or muscle) adj2 training).tw.
- 22 diet therapy/ or Nutrition Therapy/ or Nutritional Support/
- 23 (diet or dietary or nutrit\*).tw,kw.
- 24 (food adj3 (counsel\* or support\* or modif\*)).tw.
- 25 ((energy or protein) adj3 supplement\*).tw.
- 26 Dietary Supplements/
- 27 Physical Therapy Modalities/ or (physical therap\* or physiotherap\*).tw,kw.
- 28 Counseling/ or counsel?ing.tw,kw.
- 29 behavior therapy/ or cognitive behavioral therapy/ or Psychotherapy/ or Relaxation Therapy/
- 30 Stress, Psychological/rh, th
- 31 ((psychological or psychosocial or cognitive) adj3 (intervention\* or therap\*)).tw.



1  
2  
3 32 or/18-31  
4 33 17 and 32  
5 34 16 or 33  
6 35 randomized controlled trial.pt.  
7 36 controlled clinical trial.pt.  
8 37 random\*.tw.  
9 38 placebo.ab.  
10 39 clinical trials as topic.sh.  
11 40 trial.ti.  
12 41 or/35-40  
13 42 exp animals/ not humans/  
14 43 (infant/ or child/ or adolescent/) not adult/  
15 44 41 not (42 or 43)  
16 45 34 and 44  
17 46 45 use medall

#### Embase Classic+Embase

1 (prehab\* or pre-hab\*).mp.  
2 (preoperative\* rehabilitation or preoperative\* training).tw.  
3 ((perioperat\* or peri operat\*) adj3 (exercis\* or physiotherap\* or physical therapy or diet or  
4 nutrition\* or physical activit\* or counsel?ing)).tw.  
5 ((preoperat\* or pre-operat\* or presurg\* or pre-surg\*) adj5 (exercis\* or physiotherap\* or physical  
6 therapy or diet or nutrition\* or physical activit\* or counsel?ing or conditioning)).tw.  
7 ((preoperat\* or pre-operat\* or presurg\* or pre-surg\*) adj5 (diet or dietary or nutrit\*)).tw.  
8 ((preoperat\* or pre-operat\* or presurg\* or pre-surg\*) adj5 ((psychological or psychosocial or  
9 cognitive) adj3 (intervention\* or therap\*))).tw.  
10 ((preoperat\* or pre-operat\* or presurg\* or pre-surg\*) adj5 (resistance or strength or weight or  
11 muscle) adj2 training).tw.  
12 ((preoperat\* or pre-operat\* or presurg\* or pre-surg\*) adj5 (food adj3 (counsel\* or support\* or  
13 modif\*))).tw.  
14 ((preoperat\* or pre-operat\* or presurg\* or pre-surg\*) adj5 ((energy or protein) adj3  
15 supplement\*)).tw.  
16 ((preoperat\* or pre-operat\* or presurg\* or pre-surg\*) adj5 (stretch\* or aerobic\*)).tw.  
17 ((exercise\* or diet or nutrition\* counsel?ing) and (surgery or surgical)).ti.  
18 ((preoperat\* or pre-operat\* or presurg\* or pre-surg\*) adj5 (cbt or cognitive behavio?r\*)).tw.  
19 ((preoperat\* or pre-operat\* or presurg\* or pre-surg\*) adj2 counsel\*).tw.  
20 ((preoperat\* or pre-operat\* or presurg\* or pre-surg\*) adj2 supplement\*).tw.  
21 or/1-14  
22 \*preoperative care/ or \*preoperative period/ or (preoperat\* or pre-operat\* or presurg\* or pre-  
23 surg\*).ti.  
24 exp \*kinesiotherapy/  
25 exp \*exercise/  
26 (exercise or exercises or stretch\* or aerobic\* or physical activit\*).ti.  
27 ((resistance or strength or weight or muscle) adj2 training).ti.  
28 diet therapy/ or diet supplementation/  
29 (diet or dietary or nutrit\*).ti.

23 (food adj3 (counsel\* or support\* or modif\*)).ti.  
 24 ((energy or protein) adj3 supplement\*).tw.  
 25 physiotherapy/  
 26 (physical therap\* or physiotherap\*).ti.  
 27 counseling/ or nutritional counseling/  
 28 behavior therapy/  
 29 cognitive behavioral therapy/ or cognitive therapy/  
 30 psychotherapy/  
 31 ((psychological or psychosocial or cognitive) adj3 (intervention\* or therap\*)).ti.  
 32 or/17-31  
 33 16 and 32  
 34 15 or 33  
 35 double-blind\*.mp. or placebo\*.tw. or blind\*.tw. or trial.ti.  
 36 random\*.ti.  
 37 (random\* adj2 (trial\* or stud\*)).tw.  
 38 35 or 36 or 37  
 39 34 and 38  
 40 (child/ or childhood/ or infant/) not adult/  
 41 (exp animal/ or nonhuman/) not exp human/  
 42 39 not (40 or 41)

#### EBM Reviews - Cochrane Central Register of Controlled Trials

1 (prehab\* or pre-hab\*).tw,kw.  
 2 (preoperative\* rehabilitation or preoperative\* training).tw,kw.  
 3 ((perioperat\* or peri operat\*) adj3 (exercis\* or physiotherap\* or physical therapy or diet or  
 nutrition\* or physical activit\* or counsel?ing)).tw.  
 4 ((preoperat\* or pre-operat\* or presurg\* or pre-surg\*) adj2 (exercis\* or physiotherap\* or physical  
 therapy or diet or nutrition\* or physical activit\* or counsel?ing or conditioning)).tw.  
 5 ((preoperat\* or pre-operat\* or presurg\* or pre-surg\*) adj4 (exercis\* or physiotherap\* or physical  
 therapy or diet or nutrition\* or physical activit\* or counsel?ing or conditioning)).ti.  
 6 Preoperative Exercise/  
 7 ((exercise\* or diet or nutrition\* counsel?ing) and (surgery or surgical)).ti.  
 8 ((preoperat\* or pre-operat\* or presurg\* or pre-surg\*) adj5 ((psychological or psychosocial or  
 cognitive) adj3 (intervention\* or therap\*))).tw.  
 9 ((preoperat\* or pre-operat\* or presurg\* or pre-surg\*) adj2 (diet or dietary or nutrit\*)).tw.  
 10 ((preoperat\* or pre-operat\* or presurg\* or pre-surg\*) adj5 (resistance or strength or weight or  
 muscle) adj2 training).tw.  
 11 ((preoperat\* or pre-operat\* or presurg\* or pre-surg\*) adj5 (food adj3 (counsel\* or support\* or  
 modif\*))).tw.  
 12 ((preoperat\* or pre-operat\* or presurg\* or pre-surg\*) adj5 ((energy or protein) adj3  
 supplement\*)).tw.  
 13 ((preoperat\* or pre-operat\* or presurg\* or pre-surg\*) adj3 (exercise or exercises or stretch\* or  
 aerobic\* or physical activit\*)).tw.  
 14 ((preoperat\* or pre-operat\* or presurg\* or pre-surg\*) adj3 (cbt or cognitive behavio?r\*)).tw.  
 15 ((preoperat\* or pre-operat\* or presurg\* or pre-surg\*) adj2 counsel\*).tw.  
 16 ((preoperat\* or pre-operat\* or presurg\* or pre-surg\*) adj2 supplement\*).tw.

- 1  
2  
3 17 or/1-16  
4 18 (infant/ or child/ or adolescent/) not adult/  
5 19 17 not 18  
6 20 remove duplicates from 19  
7  
8  
9  
10

11 APA PsycInfo  
12  
13

- 14 1 (prehab\* or pre-hab\*).tw.  
15  
16 2 (preoperative\* rehabilitation or preoperative\* training).tw.  
17 3 ((perioperat\* or peri operat\*) adj3 (exercis\* or physiotherap\* or physical therapy or diet or  
18 nutrition\* or physical activit\* or counsel?ing)).tw.  
19 4 ((exercise\* or diet or nutrition\* counsel?ing) and (surgery or surgical)).ti.  
20 5 1 or 2 or 3 or 4  
21 6 surgical patients/ or (preoperat\* or pre-operat\* or presurg\* or pre-surg\*).ti.  
22 7 exp exercise/ or physical activity/ or physical fitness/  
23 8 (exercise or exercises or stretch\* or aerobic\* or physical activit\*).tw.  
24 9 ((resistance or strength or weight or muscle) adj2 training).tw.  
25 10 Diets/  
26 11 Nutrition/ or Dietary Supplements/  
27 12 (diet or dietary or nutrit\*).tw.  
28 13 (food adj3 (counsel\* or support\* or modif\*)).tw.  
29 14 ((energy or protein) adj3 supplement\*).tw.  
30 15 physical therapy/ or physical treatment methods/  
31 16 (physical therap\* or physiotherap\*).tw.  
32 17 Counseling/  
33 18 counsel?ing.tw.  
34 19 Behavior Therapy/ or Cognitive Behavior Therapy/ or Cognitive Therapy/  
35 20 Psychotherapy/  
36 21 ((psychological or psychosocial or cognitive) adj3 (intervention\* or therap\*)).tw.  
37 22 or/7-21  
38 23 6 and 22  
39 24 5 or 23  
40 25 exp Clinical Trials/ or Placebo/ or (random\* or sham or placebo\* or ((singl\* or doubl\*) adj  
41 (blind\* or dumm\* or mask\*)) or ((tripl\* or trebl\*) adj (blind\* or dumm\* or mask\*)) or (control\* adj3  
42 (study or studies or trial\* or group\*)) or Nonrandom\* or non random\* or non-random\* or quasi-random\*  
43 or quasirandom\* or allocated or ((open label or open-label) adj5 (study or studies or trial\*)) or  
44 ((equivalence or superiority or non-inferiority or noninferiority) adj3 (study or studies or trial\*)) or  
45 ((pragmatic or practical) adj3 trial\*) or ((quasiexperimental or quasi-experimental) adj3 (study or studies  
46 or trial\*)) or (phase adj3 (III or "3") adj3 (study or studies or trial\*))).ti,ab,hw.  
47  
48  
49  
50  
51 26 24 and 25  
52  
53  
54

55 CinahlComplete  
56  
57  
58  
59  
60

| #   | Query                                                                                                                                                                                                                                                                                                      |
|-----|------------------------------------------------------------------------------------------------------------------------------------------------------------------------------------------------------------------------------------------------------------------------------------------------------------|
| S1  | (MH "Prehabilitation")                                                                                                                                                                                                                                                                                     |
| S2  | TI ( (prehab* or pre-hab* ) OR AB ( (prehab* or pre-hab* ) )                                                                                                                                                                                                                                               |
| S3  | TI ( (preoperative* rehabilitation or preoperative* training ) OR AB ( (preoperative* rehabilitation or preoperative* training ) )                                                                                                                                                                         |
| S4  | TI ( ((perioperat* or peri operat*) N3 (exercis* or physiotherap* or physical therapy or diet or nutrition* or physical activit* or counsel?ing)) ) OR AB ( ((perioperat* or peri operat*) N3 (exercis* or physiotherap* or physical therapy or diet or nutrition* or physical activit* or counsel?ing)) ) |
| S5  | S1 OR S2 OR S3 OR S4                                                                                                                                                                                                                                                                                       |
| S6  | (MH "Preoperative Care") or (MH "Preoperative Period") or TI (preoperat* or pre-operat* or presurg* or pre-surg)                                                                                                                                                                                           |
| S7  | (MH "Therapeutic Exercise+")                                                                                                                                                                                                                                                                               |
| S8  | (MH "Exercise+")                                                                                                                                                                                                                                                                                           |
| S9  | (MH "Physical Fitness+")                                                                                                                                                                                                                                                                                   |
| S10 | TI ( (exercise or exercises or stretch* or aerobic* or physical activit*) ) OR AB ( (exercise or exercises or stretch* or aerobic* or physical activit*) )                                                                                                                                                 |
| S11 | TI ( (resistance or strength or weight or muscle) N2 training ) OR AB ( (resistance or strength or weight or muscle) N2 training )                                                                                                                                                                         |
| S12 | (MH "Diet Therapy+")                                                                                                                                                                                                                                                                                       |
| S13 | (MH "Nutritional Support+")                                                                                                                                                                                                                                                                                |

1  
2  
3  
4  
5  
6  
7  
8  
9  
10  
11  
12  
13  
14  
15  
16  
17  
18  
19  
20  
21  
22  
23  
24  
25  
26  
27  
28  
29  
30  
31  
32  
33  
34  
35  
36  
37  
38  
39  
40  
41  
42  
43  
44  
45  
46  
47  
48  
49  
50  
51  
52  
53  
54  
55  
56  
57  
58  
59  
60

- S14 TI ( (diet or dietary or nutrit\*) ) OR AB ( (diet or dietary or nutrit\*) )
- S15 TI ( food N3 (counsel\* or support\* or modif\*) ) OR AB ( food N3 (counsel\* or support\* or modif\*) )
- S16 TI ( (energy or protein) N3 supplement\* ) OR AB ( (energy or protein) N3 supplement\* )
- S17 (MH "Dietary Supplementation")
- S18 (MH "Physical Therapy+")
- S19 (MH "Physical Therapy Service")
- S20 TI ( (physical therap\* or physiotherap\*) ) OR AB ( (physical therap\* or physiotherap\*) )
- S21 (MH "Counseling+")
- S22 TI counsel?ing OR AB counsel?ing
- S23 (MH "Behavior Therapy") OR (MH "Cognitive Therapy")
- S24 (MH "Psychotherapy+")
- S25 TI ( (psychological or psychosocial or cognitive) N3 (intervention\* or therap\*) ) OR AB ( (psychological or psychosocial or cognitive) N3 (intervention\* or therap\*) )
- S26 S7 OR S8 OR S9 OR S10 OR S11 OR S12 OR S13 OR S14 OR S15 OR S16 OR S17 OR S18 OR S19 OR S20 OR S21 OR S22 OR S23 OR S24 OR S25
- S27 S6 AND S26
- S28 TI ( (preoperat\* or pre-operat\* or presurg\* or pre-surg\*) N3 (exercis\* or physiotherap\* or physical therapy or diet or nutrition\* or physical activit\* or counsel?ing or conditioning) ) OR AB ( (preoperat\* or pre-operat\* or presurg\* or pre-surg\*) N3 (exercis\* or physiotherap\* or

physical therapy or diet or nutrition\* or physical activit\* or  
counsel?ing or conditioning) )

S29 TI ( ((preoperat\* or pre-operat\* or presurg\* or pre-  
surg\*)N5 ((psychological or psychosocial or cognitive) N3  
(intervention\* or therap\*)) ) OR AB ( ((preoperat\* or pre-  
operat\* or presurg\* or pre-surg\*)N5 ((psychological or  
psychosocial or cognitive) N3 (intervention\* or therap\*)) )

S30 TI ( ((preoperat\* or pre-operat\* or presurg\* or pre-surg\*)  
N5 (diet or dietary or nutrit\*)) ) OR AB ( ((preoperat\* or  
pre-operat\* or presurg\* or pre-surg\*) N5 (diet or dietary or  
nutrit\*)) )

S31 TI ( ((preoperat\* or pre-operat\* or presurg\* or pre-surg\*)  
N5 (resistance or strength or weight or muscle) N2 training)  
) OR AB ( ((preoperat\* or pre-operat\* or presurg\* or pre-  
surg\*) N5 (resistance or strength or weight or muscle) N2  
training) )

S32 TI ( ((preoperat\* or pre-operat\* or presurg\* or pre-surg\*)  
N5 ((energy or protein) N3 supplement\*)) ) OR AB ( (  
preoperat\* or pre-operat\* or presurg\* or pre-surg\*) N5  
((energy or protein) N3 supplement\*)) )

S33 TI ( ((preoperat\* or pre-operat\* or presurg\* or pre-surg\*)  
N5 (exercise or exercises or stretch\* or aerobic\* or physical  
activit\*)) ) OR AB ( ((preoperat\* or pre-operat\* or  
presurg\* or pre-surg\*) N5 (exercise or exercises or stretch\*  
or aerobic\* or physical activit\*)) )

S34 TI ( (preoperat\* or pre-operat\* or presurg\* or pre-surg\*)  
N5 (cbt or cognitive behavior\* or cognitive behaviour)) )  
OR AB ( (preoperat\* or pre-operat\* or presurg\* or pre-  
surg\*) N5 (cbt or cognitive behavior\* or cognitive  
behaviour)) )

S35 TI ( ((preoperat\* or pre-operat\* or presurg\* or pre-surg\*)  
N2 counsel\*) ) OR AB ( ((preoperat\* or pre-operat\* or  
presurg\* or pre-surg\*) N2 counsel\*) )

S36 TI ( ((preoperat\* or pre-operat\* or presurg\* or pre-surg\*)  
N2 supplement ) OR AB ( ((preoperat\* or pre-operat\* or  
presurg\* or pre-surg\*) N2 supplement )

1  
2  
3  
4 S37 S5 OR S27 OR S28 OR S29 OR S30 OR S31 OR S32 OR  
5 S33 OR S34 OR S35 OR S36  
6  
7 ( MH ( randomized controlled trials OR double-blind  
8 studies OR single-blind studies OR random assignment OR  
9 pretest-posttest design OR cluster sample ) OR TI (   
10 randomised OR randomized ) OR AB random\* OR TI trial  
11 OR ( (MH (sample size) AND AB (assigned OR allocated  
12 OR control)) ) OR MH ( placebos OR crossover design OR  
13 comparative studies ) OR AB ( (control W5 group) OR  
14 (cluster W3 RCT) OR PT (randomized controlled trial)) )  
15 NOT ( ( MH animals+ OR MH (animal studies) OR TI  
16 (animal model\*) ) NOT MH (human) )  
17 S38  
18  
19 S39 S37 AND S38  
20  
21 S40 (MH "Child+") NOT (MH "Adult+")  
22  
23  
24 S41 S39 NOT S40  
25  
26

---

27  
28  
29  
30  
31  
32 Web of Science  
33  
34  
35

36 (infant/ or child/ or adolescent/) not adult/

37 ((preoperat\* or pre-operat\* or presurg\* or pre-surg\*) N5 (cbt or cognitive behavior\* or cognitive  
38 behaviour)).  
39  
40

- 41  
42 1. (ALL=(prehab\*)) OR ALL=("pre habilitation")  
43  
44 2. (TI=((preoperat\* OR pre-operat\* OR presurg\* OR pre-surg\*) )) AND TI=(exercis\* or physiotherap\*  
45 or physical therapy or diet or nutrition\* or physical activit\* or counsel\* OR condition\*)  
46  
47 3. (TI=((preoperat\* OR pre-operat\* OR presurg\* OR pre-surg\*))) AND TI=(counsel\* OR psych\* OR  
48 behavior therap\* OR behaviour therap\*)  
49  
50 4. (TI=(preoperat\* OR pre-operat\* OR presurg\* OR pre-surg\*)) AND TI=(nutrition OR diet OR  
51 supplement OR dietary)  
52  
53 5. (TI=(exercise\* or diet or nutrition\* counsel\*)) AND TI=(surgery or surgical)  
54  
55 6. (((#1) OR #2) OR #3) OR #4) OR #5  
56  
57  
58  
59  
60

## 7. Search

(TS=(randomised OR randomized OR randomisation OR randomisation OR placebo\* OR (random\* AND (allocat\* OR assign\* ) ) OR (blind\* AND (single OR double OR treble OR triple) )) NOT TS=(animal or animals or pisces or fish or fishes or catfish or catfishes or sheatfish or silurus or arius or heteropneustes or clarias or gariepinus or fathead minnow or fathead minnows or pimephales or promelas or cichlidae or trout or trouts or char or chars or salvelinus or salmo or oncorhynchus or guppy or guppies or millionfish or poecilia or goldfish or goldfishes or carassius or auratus or mullet or mullets or mugil or curema or shark or sharks or cod or cods or gadus or morhua or carp or carps or cyprinus or carpio or killifish or eel or eels or anguilla or zander or sander or lucioperca or stizostedion or turbot or turbots or psetta or flatfish or flatfishes or plaice or pleuronectes or platessa or tilapia or tilapias or oreochromis or sarotherodon or common sole or dover sole or solea or zebrafish or zebrafishes or danio or rerio or seabass or dicentrarchus or labrax or morone or lamprey or lampreys or petromyzon or pumpkinseed or pumpkinseeds or lepomis or gibbosus or herring or clupea or harengus or amphibia or amphibian or amphibians or anura or salientia or frog or frogs or rana or toad or toads or bufo or xenopus or laevis or bombina or epidalea or calamita or salamander or salamanders or newt or newts or triturus or reptilia or reptile or reptiles or bearded dragon or pogona or vitticeps or iguana or iguanas or lizard or lizards or anguis fragilis or turtle or turtles or snakes or snake or aves or bird or birds or quail or quails or coturnix or bobwhite or colinus or virginianus or poultry or poultries or fowl or fowls or chicken or chickens or gallus or zebra finch or taeniopygia or guttata or canary or canaries or serinus or canaria or parakeet or parakeets or grasskeet or parrot or parrots or psittacine or psittacines or shelduck or tadorna or goose or geese or branta or leucopsis or woodlark or lullula or flycatcher or ficedula or hypoleuca or dove or doves or geopelia or cuneata or duck or ducks or greylag or graylag or anser or harrier or circus pygargus or red knot or great knot or calidris or canutus or godwit or limosa or lapponica or meleagris or gallopavo or jackdaw or corvus or monedula or ruff or philomachus or pugnax or lapwing or peewit or plover or vanellus or swan or cygnus or columbianus or bewickii or gull or chroicocephalus or ridibundus or albifrons or great tit or parus or aythya or fuligula or streptopelia or risoria or spoonbill or platalea or leucorodia or blackbird or turdus or merula or blue tit or cyanistes or pigeon or pigeons or columba or pintail or anas or starling or sturnus or owl or athene noctua or pochard or ferina or cockatiel or nymphius or hollandicus or skylark or alauda or tern or sterna or teal or crecca or oystercatcher or haematopus or ostralegus or shrew or shrews or sorex or araneus or crocidura or russula or european mole or talpa or chiroptera or bat or bats or eptesicus or serotinus or myotis or dasycneme or daubentonii or pipistrelle or pipistrellus or cat or cats or felis or catus or feline or dog or dogs or canis or canine or canines or otter or otters or lutra or badger or badgers or meles or fitchew or fitch or fougart or foulmart or ferrets or ferret or polecat or polecats or mustela or putorius or weasel or weasels or fox or foxes or vulpes or common seal or phoca or vitulina or grey seal or halichoerus or horse or horses or equus or equine or equidae or donkey or donkeys or mule or mules or pig or pigs or swine or swines or hog or hogs or boar or boars or porcine or piglet or piglets or sus or scrofa or llama or llamas or lama or glama or deer or deers or cervus or elaphus or cow or cows or bos taurus or bos indicus or bovine or bull or bulls or cattle or bison or bisons or sheep or sheeps or ovis aries or ovine or lamb or lambs or mouflon or mouflons or goat or goats or capra or caprine or chamois or rupicapra or leporidae or lagomorpha or lagomorph or rabbit or rabbits or oryctolagus or cuniculus or laprine or hares or lepus or rodentia or rodent or rodents or murinae or mouse or mice or mus or musculus or murine or woodmouse or apodemus or rat or rats or rattus or norvegicus or guinea pig or guinea pigs or cavia or porcellus or hamster or hamsters or mesocricetus or cricetus or cricetus or gerbil or gerbils or jird or jirds or meriones or unguiculatus or jerboa or jerboas or jaculus or chinchilla or chinchillas or beaver or beavers or castor fiber or castor canadensis or sciuridae or squirrel or squirrels or sciurus or chipmunk or chipmunks or marmot



1  
2  
3 or marmots or marmota or suslik or susliks or spermophilus or cynomys or cottonrat or cottonrats or  
4 sigmodon or vole or voles or microtus or myodes or glareolus or primate or primates or prosimian or  
5 prosimians or lemur or lemurs or lemuridae or loris or bush baby or bush babies or bushbaby or  
6 bushbabies or galago or galagos or anthropoidea or anthropoids or simian or simians or monkey or  
7 monkeys or marmoset or marmosets or callithrix or cebuella or tamarin or tamarins or saguinus or  
8 leontopithecus or squirrel monkey or squirrel monkeys or saimiri or night monkey or night monkeys or  
9 owl monkey or owl monkeys or douroucoulis or aotus or spider monkey or spider monkeys or ateles or  
10 baboon or baboons or papio or rhesus monkey or macaque or macaca or mulatta or cynomolgus or  
11 fascicularis or green monkey or green monkeys or chlorocebus or vervet or vervets or pygerythrus or  
12 hominoidea or ape or apes or hylobatidae or gibbon or gibbons or siamang or siamangs or nomascus or  
13 symphalangus or hominidae or orangutan or orangutans or pongo or chimpanzee or chimpanzees or pan  
14 troglodytes or bonobo or bonobos or pan paniscus or gorilla or gorillas or troglodytes))

17 8. (#6) AND #7  
18  
19  
20  
21  
22  
23  
24  
25  
26  
27  
28  
29  
30  
31  
32  
33  
34  
35  
36  
37  
38  
39  
40  
41  
42  
43  
44  
45  
46  
47  
48  
49  
50  
51  
52  
53  
54  
55  
56  
57  
58  
59  
60

**Supplementary file 2 – Datapoints extracted from included RCTs**

1. Author
2. Year of publication
3. Countries of origin
4. Study start and end dates
5. Patient partners
  - a. As authors
    - i. Demographics
    - ii. Roles
  - b. As acknowledged collaborators
    - i. Demographics
    - ii. Roles
6. Prehabilitation definition
  - a. In introduction or background
  - b. In methods
7. Prehabilitation characteristics
  - a. Multimodal (y/n)
8. Prehabilitation Components (eg, exercise, nutrition, psychosocial, cognitive)
  - a. Type of exercise
    - i. Unimodal
    - ii. Multimodal
    - iii. Interval training
    - iv. Other
    - v. Components (eg, cardio, strength, stretching, respiratory exercise)
  - b. Type of nutrition
    - i. Counselling
    - ii. Supplementation
    - iii. Combined
    - iv. Other
  - c. Type of psychosocial
    - i. Motivational interviewing
    - ii. Anxiety management
    - iii. Stress management
    - iv. Other
  - d. Type of cognitive
  - e. Other co-interventions
9. Enhanced recovery after surgery (ERAS) (y/n)
10. Weight loss objective (y/n)
11. Duration of prehabilitation
  - a. Average
  - b. Program
    - i. Minimum participation
    - ii. Maximum participation
  - c. Per session
12. Frequency of prehabilitation
13. Intervention time-point
  - a. Preoperative only
  - b. Preoperative plus rehab after surgery
14. Location of prehabilitation

- 1
  - 2
  - 3
  - 4
  - 5
  - 6
  - 7
  - 8
  - 9
  - 10
  - 11
  - 12
  - 13
  - 14
  - 15
  - 16
  - 17
  - 18
  - 19
  - 20
  - 21
  - 22
  - 23
  - 24
  - 25
  - 26
  - 27
  - 28
  - 29
  - 30
  - 31
  - 32
  - 33
  - 34
  - 35
  - 36
  - 37
  - 38
  - 39
  - 40
  - 41
  - 42
  - 43
  - 44
  - 45
  - 46
  - 47
  - 48
  - 49
  - 50
  - 51
  - 52
  - 53
  - 54
  - 55
  - 56
  - 57
  - 58
  - 59
  - 60
- a. Home
  - b. Facility
  - c. Combined
15. Supervision
- a. Self-directed
  - b. Coach-led
  - c. Combined
16. Session format
- a. Individual
  - b. Group
  - c. Combined
17. Personalization
- a. Description of personalization
18. Motivation techniques
- a. Description of motivation techniques
  - b.
19. Control (eg, standard care or active controls such as rehabilitation after surgery)
- a. Standard care
    - i. Description of standard care
  - b. Static instructions
    - i. Description of static instructions
  - c. Other prehabilitation
    - i. Description of other prehabilitation
  - d. Rehabilitation
    - i. Description of rehabilitation
  - e. Other
    - i. Description of other
20. Surgical specialty
- a. Orthopedic
  - b. Major non-oncology
  - c. Cardiac/vascular
  - d. Oncology
  - e. Mixed
  - f. Other
21. Surgical procedure(s)
22. Population characteristics
- a. Total sample size
  - b. Sample size per arm
  - c. Age (average, range)
  - d. Sex (% females vs. males)
  - e. Gender (% women vs. men vs. non-binary/transgender/other)
  - f. Presence of specific risk factors
    - i. Multimorbidity ( $\geq 2$  comorbidities)
    - ii. ASA score
    - iii. Frailty
    - iv. Malnutrition
    - v. Obesity
    - vi. Baseline functional status
    - vii. Disability
    - viii. Presence of cancer
      - 1. Use of neoadjuvant therapies

- 1  
2  
3 23. Outcomes (counts, summary statistics, effect estimates with 95%CI; per time window)  
4 a. Health  
5 i. Complications  
6 1. Any  
7 2. Cardiopulmonary  
8 3. Surgical  
9 4. Infectious  
10 ii. Discharge disposition  
11 iii. Physical functional recovery  
12 iv. Disability  
13 v. Quality of life  
14 vi. Mortality  
15 b. Experience  
16 i. Pain  
17 ii. Patient satisfaction  
18 c. Resource use  
19 i. Length of stay  
20 ii. Costs  
21 d. Intervention Safety  
22 i. Any intervention-attributable adverse events  
23 ii. Cardiopulmonary adverse events during intervention period  
24 iii. Falls during intervention period  
25 iv. Assessor-confirmed intervention-attributable adverse events  
26  
27 24. Adherence  
28 a. Outcome type  
29 i. Binary  
30 1. Threshold used  
31 ii. Continuous  
32 b. Adherence rate  
33 c. Method of measurement  
34 25. Feasibility measures  
35 26. Barriers and facilitators to implementation  
36  
37  
38  
39  
40  
41  
42  
43  
44  
45  
46  
47  
48  
49  
50  
51  
52  
53  
54  
55  
56  
57  
58  
59  
60

**PRISMA-P (Preferred Reporting Items for Systematic review and Meta-Analysis Protocols) 2015 checklist: recommended items to address in a systematic review protocol\***

| Section and topic                 | Item No | Checklist item                                                                                                                                                                                                                | Page            |
|-----------------------------------|---------|-------------------------------------------------------------------------------------------------------------------------------------------------------------------------------------------------------------------------------|-----------------|
| <b>ADMINISTRATIVE INFORMATION</b> |         |                                                                                                                                                                                                                               |                 |
| Title:                            |         |                                                                                                                                                                                                                               |                 |
| Identification                    | 1a      | Identify the report as a protocol of a systematic review                                                                                                                                                                      | 1               |
| Update                            | 1b      | If the protocol is for an update of a previous systematic review, identify as such                                                                                                                                            | NA              |
| Registration                      | 2       | If registered, provide the name of the registry (such as PROSPERO) and registration number                                                                                                                                    | 6               |
| Authors:                          |         |                                                                                                                                                                                                                               |                 |
| Contact                           | 3a      | Provide name, institutional affiliation, e-mail address of all protocol authors; provide physical mailing address of corresponding author                                                                                     | 1               |
| Contributions                     | 3b      | Describe contributions of protocol authors and identify the guarantor of the review                                                                                                                                           | 14              |
| Amendments                        | 4       | If the protocol represents an amendment of a previously completed or published protocol, identify as such and list changes; otherwise, state plan for documenting important protocol amendments                               | 6               |
| Support:                          |         |                                                                                                                                                                                                                               |                 |
| Sources                           | 5a      | Indicate sources of financial or other support for the review                                                                                                                                                                 | 14              |
| Sponsor                           | 5b      | Provide name for the review funder and/or sponsor                                                                                                                                                                             | 14              |
| Role of sponsor or funder         | 5c      | Describe roles of funder(s), sponsor(s), and/or institution(s), if any, in developing the protocol                                                                                                                            | 14              |
| <b>INTRODUCTION</b>               |         |                                                                                                                                                                                                                               |                 |
| Rationale                         | 6       | Describe the rationale for the review in the context of what is already known                                                                                                                                                 | 4-5             |
| Objectives                        | 7       | Provide an explicit statement of the question(s) the review will address with reference to participants, interventions, comparators, and outcomes (PICO)                                                                      | 5               |
| <b>METHODS</b>                    |         |                                                                                                                                                                                                                               |                 |
| Eligibility criteria              | 8       | Specify the study characteristics (such as PICO, study design, setting, time frame) and report characteristics (such as years considered, language, publication status) to be used as criteria for eligibility for the review | 7               |
| Information sources               | 9       | Describe all intended information sources (such as electronic databases, contact with study authors, trial registers or other grey literature sources) with planned dates of coverage                                         | 8               |
| Search strategy                   | 10      | Present draft of search strategy to be used for at least one electronic database, including planned limits, such that it could be repeated                                                                                    | 8<br>Appendix 1 |

|                                    |     |                                                                                                                                                                                                                                                  |                 |
|------------------------------------|-----|--------------------------------------------------------------------------------------------------------------------------------------------------------------------------------------------------------------------------------------------------|-----------------|
| Study records:                     |     |                                                                                                                                                                                                                                                  |                 |
| Data management                    | 11a | Describe the mechanism(s) that will be used to manage records and data throughout the review                                                                                                                                                     | 8               |
| Selection process                  | 11b | State the process that will be used for selecting studies (such as two independent reviewers) through each phase of the review (that is, screening, eligibility and inclusion in meta-analysis)                                                  | 8               |
| Data collection process            | 11c | Describe planned method of extracting data from reports (such as piloting forms, done independently, in duplicate), any processes for obtaining and confirming data from investigators                                                           | 8               |
| Data items                         | 12  | List and define all variables for which data will be sought (such as PICO items, funding sources), any pre-planned data assumptions and simplifications                                                                                          | 9<br>Appendix 2 |
| Outcomes and prioritization        | 13  | List and define all outcomes for which data will be sought, including prioritization of main and additional outcomes, with rationale                                                                                                             | 9<br>Appendix 2 |
| Risk of bias in individual studies | 14  | Describe anticipated methods for assessing risk of bias of individual studies, including whether this will be done at the outcome or study level, or both; state how this information will be used in data synthesis                             | 9               |
| Data synthesis                     | 15a | Describe criteria under which study data will be quantitatively synthesised                                                                                                                                                                      | 9-10            |
|                                    | 15b | If data are appropriate for quantitative synthesis, describe planned summary measures, methods of handling data and methods of combining data from studies, including any planned exploration of consistency (such as $I^2$ , Kendall's $\tau$ ) | 9-10            |
|                                    | 15c | Describe any proposed additional analyses (such as sensitivity or subgroup analyses, meta-regression)                                                                                                                                            | 10-12           |
|                                    | 15d | If quantitative synthesis is not appropriate, describe the type of summary planned                                                                                                                                                               | NA              |
| Meta-bias(es)                      | 16  | Specify any planned assessment of meta-bias(es) (such as publication bias across studies, selective reporting within studies)                                                                                                                    | 9               |
| Confidence in cumulative evidence  | 17  | Describe how the strength of the body of evidence will be assessed (such as GRADE)                                                                                                                                                               | 9               |

**\* It is strongly recommended that this checklist be read in conjunction with the PRISMA-P Explanation and Elaboration (cite when available) for important clarification on the items. Amendments to a review protocol should be tracked and dated. The copyright for PRISMA-P (including checklist) is held by the PRISMA-P Group and is distributed under a Creative Commons Attribution Licence 4.0.**

*From: Shamseer L, Moher D, Clarke M, Ghersi D, Liberati A, Petticrew M, Shekelle P, Stewart L, PRISMA-P Group. Preferred reporting items for systematic review and meta-analysis protocols (PRISMA-P) 2015: elaboration and explanation. BMJ. 2015 Jan 2;349(jan02 1):g7647.*

# BMJ Open

## Identifying relative efficacy of components of prehabilitation in adult surgical patients: protocol for a systematic review and component network meta-analysis

|                                 |                                                                                                                                                                                                                                                                                                                                                                                                                                                                                                                                                                                                                                                                                                                                                                                                                                                                                                                                                                                                                                                                                                                                                                                                                                                                                               |
|---------------------------------|-----------------------------------------------------------------------------------------------------------------------------------------------------------------------------------------------------------------------------------------------------------------------------------------------------------------------------------------------------------------------------------------------------------------------------------------------------------------------------------------------------------------------------------------------------------------------------------------------------------------------------------------------------------------------------------------------------------------------------------------------------------------------------------------------------------------------------------------------------------------------------------------------------------------------------------------------------------------------------------------------------------------------------------------------------------------------------------------------------------------------------------------------------------------------------------------------------------------------------------------------------------------------------------------------|
| Journal:                        | <i>BMJ Open</i>                                                                                                                                                                                                                                                                                                                                                                                                                                                                                                                                                                                                                                                                                                                                                                                                                                                                                                                                                                                                                                                                                                                                                                                                                                                                               |
| Manuscript ID                   | bmjopen-2022-068797.R1                                                                                                                                                                                                                                                                                                                                                                                                                                                                                                                                                                                                                                                                                                                                                                                                                                                                                                                                                                                                                                                                                                                                                                                                                                                                        |
| Article Type:                   | Protocol                                                                                                                                                                                                                                                                                                                                                                                                                                                                                                                                                                                                                                                                                                                                                                                                                                                                                                                                                                                                                                                                                                                                                                                                                                                                                      |
| Date Submitted by the Author:   | 17-Oct-2022                                                                                                                                                                                                                                                                                                                                                                                                                                                                                                                                                                                                                                                                                                                                                                                                                                                                                                                                                                                                                                                                                                                                                                                                                                                                                   |
| Complete List of Authors:       | <p>McIsaac, Daniel; University of Ottawa, Department of Anesthesiology and Pain Medicine; Ottawa Hospital Research Institute, Clinical Epidemiology Program</p> <p>Hutton, Brian; University of Ottawa, School of Epidemiology, Public Health and Preventive Medicine; Ottawa Hospital Research Institute, Clinical Epidemiology Program</p> <p>Veroniki, Areti; St Michael's Hospital, Knowledge Translation Program</p> <p>Gill, Marlyn; Patient Partner</p> <p>Boland, L.; Ottawa Hospital Research Institute, Centre for Practice-Changing Research</p> <p>Branje, Karina; University of Ottawa, Department of Anesthesiology and Pain Medicine; Ottawa Hospital Research Institute, Clinical Epidemiology Program</p> <p>Grudzinski, Alexa L; University of Ottawa, Department of Anesthesiology and Pain Medicine</p> <p>Hladkowicz, Emily; Ottawa Hospital, Departments of Anesthesiology and Pain Medicine; Ottawa Hospital Research Institute, Clinical Epidemiology Program</p> <p>Shaw, Julia; University of Ottawa, Department of Anesthesiology and Pain Medicine; Ottawa Hospital Research Institute, Clinical Epidemiology Program</p> <p>Gillis, Chelsia; McGill University, School of Human Nutrition</p> <p>The Prehabilitation Knowledge Network, Group Authorship; NA</p> |
| <b>Primary Subject Heading</b>: | Surgery                                                                                                                                                                                                                                                                                                                                                                                                                                                                                                                                                                                                                                                                                                                                                                                                                                                                                                                                                                                                                                                                                                                                                                                                                                                                                       |
| Secondary Subject Heading:      | Rehabilitation medicine                                                                                                                                                                                                                                                                                                                                                                                                                                                                                                                                                                                                                                                                                                                                                                                                                                                                                                                                                                                                                                                                                                                                                                                                                                                                       |
| Keywords:                       | SURGERY, Quality in health care < HEALTH SERVICES ADMINISTRATION & MANAGEMENT, REHABILITATION MEDICINE                                                                                                                                                                                                                                                                                                                                                                                                                                                                                                                                                                                                                                                                                                                                                                                                                                                                                                                                                                                                                                                                                                                                                                                        |
|                                 |                                                                                                                                                                                                                                                                                                                                                                                                                                                                                                                                                                                                                                                                                                                                                                                                                                                                                                                                                                                                                                                                                                                                                                                                                                                                                               |

SCHOLARONE™  
Manuscripts

1  
2  
3 **Identifying relative efficacy of components of prehabilitation in adult surgical patients: protocol for**  
4 **a systematic review and component network meta-analysis**  
5

6 **Corresponding Author: Daniel I McIsaac MD, MPH, FRCPC**

7 Associate Professor of Anesthesiology and Pain Medicine, University of Ottawa

8 Associate Scientist, Ottawa Hospital Research Institute

9 Email: [dmcisaac@toh.ca](mailto:dmcisaac@toh.ca)

10 Phone-613-761-4940/Fax-613-761-5209

11 Department of Anesthesiology, The Ottawa Hospital Civic Campus

12 Room B311, 1053 Carling Ave

13 Ottawa, ON K1Y 4E9

14 **Authors:** McIsaac, Daniel I MD, MPH, FRCPC<sup>1,2,3\*</sup>; Hutton, Brian PhD<sup>2,3</sup>; Veroniki, Areti Angeliki  
15 PhD<sup>4</sup>; Gill, Marlyn MSW<sup>5</sup>; Boland, Laura SLP(c), PhD<sup>6</sup>; Branje, Karina MSc<sup>1,2</sup>; Grudzinski, Alexa L  
16 MD<sup>1</sup>; Hladkiewicz, Emily MA.Ed<sup>1,2</sup>; Shaw, Julia MSc<sup>1,2</sup>; Gillis, Chelsia RD, PhD<sup>7</sup>; the Prehabilitation  
17 Knowledge Network Authorship Group\*

18 **Affiliations:**

19 **1** Department of Anesthesiology and Pain Medicine, University of Ottawa, Ottawa, Canada

20 **2** Clinical Epidemiology Program, the Ottawa Hospital Research Institute, Ottawa, Canada

21 **3** School of Epidemiology & Public Health, University of Ottawa, Ottawa, Canada

22 **4** Knowledge Translation Program, Li Ka Shing Knowledge Institute, St Michael's Hospital, Toronto,  
23 Canada

24 **5** Patient Partner, Calgary, Canada

25 **6** Centre for Practice-Changing Research, Ottawa Hospital Research Institute, Ottawa, Canada

26 **7** Department of Human Nutrition, McGill University, Montreal, Canada

27 **\*Individual collaborators with group authorship:** Shamsuddin Akhtar, Marlis Atkins, Sylvie Aucoin,

28 Rebecca Auer, Carlota Basualdo-Hammond, Paul Beaulé, Mary Brindle, Gregory Bryson, Franco Carli,

29 Antoine Eskander, Dean Fergusson, Julio F Fiore Jr., Alan Forster, Melani Gillam, Leah Gramlich, Jayna

30 Holroyd-Leduc, Timothy Jackson, Rachel Khadaroo, Manoj Lalu, Cameron Love, Guillaume Martel,

31 Colin McCartney, Dolores McKeen, Amanda Meliambro, Husein Moloo, Ronald Moore, John

32 Muscedere, Julie Nantel, Stephane Poitras, Celena Scheede-Bergdahl, Risa Shorr, Monica Taljaard, Tom

33 Wallace, Duminda Wijeyesundera

34 **Word count:** 2846



## ABSTRACT

**Introduction:** Prehabilitation is a high-priority intervention for patients, the public, clinicians, and health systems. However, existing knowledge syntheses are generally low quality and do not provide insights regarding the relative efficacy of different prehabilitation components (e.g., exercise, nutrition, psychosocial or cognitive interventions). The objective of the planned review is to evaluate the relative efficacy of different prehabilitation components to inform current care, implementation, and future research.

**Methods and analysis:** We will perform a systematic review and component network meta-analysis (CNMA). We will use a peer-reviewed search strategy to identify all randomized trials of prehabilitation in adult surgical patients from Ovid Medline, Embase, the CINAHL, PsychINFO, Web of Science, and the Cochrane Central Register of Controlled Trials, along with grey literature. All stages of the review and data extraction process will be performed in duplicate following recommended best practices. To compare the relative efficacy of different prehabilitation components (prespecified as exercise, nutrition, psychosocial or cognitive interventions), we will use CNMA, an extension of network meta-analysis that allows estimation of the contributions to efficacy of each component of a multicomponent intervention through direct and indirect comparisons. We will use additive CNMA models for critical outcomes (post-operative complications, patient-reported recovery, physical recovery, and length of stay); standard care will be the common reference condition. Pre-specified sensitivity and subgroup analyses will be conducted.

**Ethics and dissemination:** This review of published data does not require ethical review. Results will be disseminated via scientific conferences, peer reviewed publications, social and traditional media and via our research network to target partners and organizations.

1  
2  
3  
4  
5  
6 **Strengths and limitations of this study**  
7

8  
9 -A prespecified protocol based on best practices for systematic review and meta-analysis will guide  
10  
11 conduct of the study  
12

13  
14 -All stages of the study will be done in collaboration with patient and knowledge user partners so that  
15  
16 findings will be co-produced in an integrated knowledge translation framework  
17

18  
19 -Component network meta-analysis will allow comparison of the relative efficacy of different  
20  
21 prehabilitation components, even when multiple components are delivered simultaneously  
22

23  
24 -If assumptions underlying component network meta-analysis are not met, we may be unable to estimate  
25  
26 relative efficacy of different components  
27  
28  
29  
30  
31  
32  
33  
34  
35  
36  
37  
38  
39  
40  
41  
42  
43  
44  
45  
46  
47  
48  
49  
50  
51  
52  
53  
54  
55  
56  
57  
58  
59  
60

## Introduction

Globally, >300 million surgical procedures are performed each year.[1,2] These surgeries mostly occur on a planned (also referred to as ‘elective’) basis,[3] meaning that wait-times can be positively leveraged to optimize patient status prior to surgery. Patient optimization is critical in supporting high value surgical care as adverse postoperative events that matter to patients and the healthcare system are common.[4] Complications such as cardiopulmonary events, infections and major bleeding occur in 10-20% of patients.[5-7] Impaired functional recovery or new clinically significant disability develop in more than 1 in 5 surgical patients; such adverse events are even more common amongst older patients and those with poor baseline health.[8-12] Effective strategies to improve outcomes for the millions of people having surgery each year are urgently needed.

Prehabilitation is a process undertaken in advance of surgery, which has the specific intent of improving an individual’s functional, physiologic, cognitive and/or mental health status through targeted interventions.[13,14] Patients, the public, and international specialty societies identify prehabilitation as a high priority intervention, including multiple James Lind Alliance priority setting partnerships.[15-17] However, despite the face validity and enthusiasm for prehabilitation interventions, a recently completed umbrella review of 55 prehabilitation systematic reviews found that existing evidence synthesis is insufficient to inform practice.[18] Several key knowledge gaps preclude translation of current evidence into practice. First, existing systematic reviews have major methodologic shortcomings; 51 of 55 prehabilitation reviews synthesized in a recent umbrella review were rated as low quality.[18,19] Second, prehabilitation interventions are heterogeneous, as they may consist of different components, including exercise, nutrition, psychosocial and cognitive interventions, or combinations thereof.[18] Existing prehabilitation reviews have typically focused only on single component interventions, or pooled all types of prehabilitation components or interventions together. This means that patients, clinicians, researchers, and health system planners are unable to determine what specific components, or combinations of components, contribute the most to prehabilitation efficacy and deserve the greatest focus in

1  
2  
3 implementation and future research. Understanding how the current evidence network can be leveraged to  
4  
5 detect differences between the effects of interventions and their individual components would help to  
6  
7 address these important gaps.  
8

9  
10 Component network meta-analysis (CNMA), an extension to network meta-analysis, allows  
11  
12 estimation of separate effects for each component of a multicomponent intervention through direct and  
13  
14 indirect comparison, even when these are delivered in combination.[20,21] We propose a CNMA based on  
15  
16 an up-to-date, high-quality systematic review, to address important knowledge gaps in the prehabilitation  
17  
18 evidence base. Our objective is to estimate which prehabilitation components contribute the greatest  
19  
20 efficacy in improving critical outcomes, including postoperative complication rates, patient-reported  
21  
22 recovery, physical recovery, and length of stay in adult patients preparing for surgery.  
23  
24  
25  
26  
27  
28  
29  
30  
31  
32  
33  
34  
35  
36  
37  
38  
39  
40  
41  
42  
43  
44  
45  
46  
47  
48  
49  
50  
51  
52  
53  
54  
55  
56  
57  
58  
59  
60

## Methods

### *Design*

This study will be a systematic review with CNMA. The study began in March 2022 and has an anticipated end date of March 2023. This protocol has been prepared in consideration of the Preferred Reporting Items for Systematic review and Meta-Analysis Protocols (PRISMA-P) guidelines, the PRISMA extension for network meta-analysis, and specific considerations for CNMA.[22-24] Methods for the review are directly informed by the Cochrane Handbook and Methodological Expectations of Cochrane Intervention Reviews (MECIR).[25,26] Findings will be reported according to PRISMA guidance.[23,27,28] Any deviations from our prespecified methodology will be described in the final report (with rationale).[29] The protocol has been submitted for registration to the International Prospective Register of Systematic Reviews (PROSPERO).

### *Patient and public involvement*

This review will be conducted and co-produced with partners using an integrated knowledge translation (iKT) framework.[30-32] Specifically, patients who will be impacted by the research and knowledge users who will implement evidence in practice have been, and will continue to be, regularly engaged through meetings, surveys and one-on-one discussions. A start-up meeting occurred June 3<sup>rd</sup>, 2022; mid-study, post-synthesis and wrap up team meetings will also be held to ensure meaningful input can be obtained throughout the course of the study. Patient and public involvement will be reported according to the Guidance for Reporting Involvement of Patients and the Public-2 checklist.[33]

### *Intervention definition*

A prehabilitation intervention is intended to improve physical, physiologic, cognitive or psychosocial function and to correct deficiencies in these domains in advance of surgery.[13,14] We will define and operationalize the following working definition of prehabilitation based on consistent descriptions of prehabilitation provided in the literature: a unimodal intervention consisting of exercise (e.g., aerobic, strength or flexibility focused interventions), nutrition (e.g., advice, supplementation or other

1  
2  
3 interventions to improve oral or enteral macro or micronutrient intake), cognitive (e.g., interventions to  
4 improve or maintain cognitive function), or psychosocial (e.g., interventions to improve mood, affect or  
5 motivation) training, or a multimodal intervention that combines exercise, nutrition, cognitive, and/or  
6 psychosocial training with or without other interventions, undertaken for 7 or more days before  
7 surgery.[13,34-36] No limitations will be placed on duration, location or supervisory approaches to the  
8 prehabilitation intervention. For the purposes of CNMA, intervention components will be classified as:  
9 exercise, nutrition, cognitive or psychosocial. The reference category will be standard care, which is the  
10 most common comparator in existing randomized trials and meta-analyses of prehabilitation.[18]  
11  
12  
13  
14  
15  
16  
17  
18  
19  
20  
21

### 22 *Inclusion criteria*

23  
24 Selection criteria will be informed by our Population-Intervention-Comparator-Outcome question.  
25 We will include randomized trials addressing a population of adults ( $\geq 18$  years; provision of pediatric  
26 surgical care is substantively different from adults) undergoing major elective surgery where participants  
27 were exposed to a prehabilitation intervention prior to surgery compared to individuals receiving standard  
28 care or a different prehabilitation intervention (e.g., another prehabilitation intervention consisting of  
29 different components) reporting prespecified outcomes (see *Outcomes* section below).  
30  
31  
32  
33  
34  
35  
36

### 37 *Exclusion criteria*

38  
39 Studies evaluating isolated preoperative risk factor management (e.g., smoking cessation, anemia  
40 treatment, medication management in isolation), or interventions applied immediately ( $\leq 7$  days) before  
41 surgery (a time frame consistent with enhanced recovery after surgery)[37,38] will be excluded to be  
42 consistent with accepted definitions of prehabilitation.[18] No language exclusions will be applied. Quasi  
43 experimental and other non-randomized designs will be excluded.  
44  
45  
46  
47  
48

### 49 *Outcomes*

50  
51 Consultation with partners (patients, clinicians, health system leaders, scientists) and a recent  
52 umbrella review performed by our team informed pre-specification of outcomes.[18] This led to the choice  
53 of critical and exploratory outcomes that are prioritized by knowledge users and that will be adequately  
54  
55  
56  
57  
58  
59  
60

1  
2  
3 reported in prehabilitation trials. Critical outcomes include: 1) a composite of any postoperative medical or  
4 surgical complications during the index hospitalization or within 30 days (a core outcome in surgery and  
5 perioperative medicine)[39,40] as it is a key step on the causal pathway between prehabilitation and  
6 improved recovery after surgery,[10] and is the most commonly reported outcome in prehabilitation  
7 RCTs;[36] 2) patient-reported recovery (e.g., disability or quality of life; most distal reported measure up  
8 to 90-days after surgery); 3) physical recovery (e.g., 6-minute walk test, short physical performance battery;  
9 most distal reported measure up to 90-days after surgery); and 4) length of hospital stay (LoS). Exploratory  
10 outcomes will be organized per the Institute for Healthcare Improvement Triple Aim domains, and will  
11 include health (non-home discharge, mortality), experience (pain, satisfaction), and resource use  
12 (costs).[36,41,42] These exploratory outcomes will be analyzed if adequate data and resources are available.

#### 23 24 *Search strategy*

25  
26 Our search strategy (Supplementary file 1) has been developed with our team's information  
27 specialist, and has undergone the Peer Review of Electronic Search Strategies (PRESS) review process with  
28 a second, independent information specialist.[43] Grey literature sources will be searched.[26,44] We will  
29 translate and apply our search strategy to Ovid Medline, Embase, the CINAHL, PsychINFO, Web of  
30 Science, and the Cochrane CENTRAL Register of Controlled Trials. We will assess reference lists of  
31 included trials and related reviews to identify citations missed by our search.

#### 32 33 34 35 36 37 38 39 *Study review and selection*

40  
41 All stages of the review will be conducted in duplicate by two independent reviewers using Distiller  
42 SR (Evidence Partners, Ottawa, Canada). At each stage of the review, the first 50 citations will be assessed,  
43 followed by a meeting of reviewers with study leads to review decisions, identify any issues related to  
44 disagreements and/or interpretation of selection criteria, and recalibrate reviewers' approaches as needed.  
45 The first stage will include title and abstract review. After full text review by two independent authors, any  
46 conflicts will be resolved through consensus in a meeting between study leads and reviewers; reasons for  
47 exclusion at full text review will be documented and provided in the final publication.

#### 48 49 50 51 52 53 54 55 56 *Data extraction*

1  
2  
3 Data will be extracted using a form specifically designed for this review following a piloting  
4 exercise by the review team. Key to the implementation of CNMA as our analytic approach, we will collect  
5 full descriptions of comparator conditions (e.g., standard care, other prehabilitation interventions). All data  
6 will be extracted in duplicate; disagreements will be resolved by reviewers through cooperative review of  
7 the primary source with a study lead. A full description of all anticipated data points is included in  
8 Supplementary file 2. Sample size, population characteristics, and missing data will be collected for each  
9 trial. For binary outcomes, we will collect the 2x2 table, event rates and/or effect measures (e.g., odds ratios  
10 or risk ratios) along with a measure of uncertainty (e.g., 95% confidence intervals [CIs], p-values). For  
11 continuous outcomes we will collect means and standard deviations, and/or effect estimates such as mean  
12 differences along with their 95% CIs and p-values. Any missing data will be sought directly from study  
13 authors.  
14  
15

#### 16 *Assessment of bias in included studies*

17  
18 The Cochrane Risk of Bias 2 tool will be applied in duplicate to each included RCT[45] to assess  
19 within-study bias of the included evidence. Where  $\geq 10$  studies are available in a meta-analysis, funnel plots  
20 and Egger's test will be used to assess for possible publication bias and small-study effects.[46]  
21  
22

#### 23 *Assessment of certainty of evidence*

24  
25 We will use the GRADE working group classification to assess the certainty of evidence for each  
26 outcome,[47] including modifications specific to certainty assessment in network meta-analysis.[48] This  
27 will allow us to categorize evidence as high/moderate/low/very-low certainty, which will be reported using  
28 appropriate statements.[49]  
29  
30

#### 31 *Intervention effect estimates*

32  
33 Pooled effect estimates will be reported as odds ratios (binary outcomes), mean differences  
34 (continuous outcomes on a single scale (e.g., LoS)), or standardized mean differences (SMDs) (continuous  
35 outcomes on multiple scales (e.g., functional recovery)); point estimates along with 95% CIs will be  
36 reported. Where SMDs are calculated from different scales that capture related conceptual outcomes (e.g.,  
37 patient-reported recovery via quality of life or disability scales), directionality will be standardized prior to  
38  
39  
40  
41  
42  
43  
44  
45  
46  
47  
48  
49  
50  
51  
52  
53  
54  
55  
56  
57  
58  
59  
60



1  
2  
3 analysis. Where multiple scales that reflect functional recovery are reported within a single included study,  
4 we will preferentially select for pooling generic (vs. disease specific) scales to enhance generalizability,  
5 and quality of life (vs. other concepts) scales, as our previous work demonstrates that quality of life is  
6 reported far more frequently in prehabilitation studies than related measures like disability.[18] Where  
7 continuous outcome measures are not reported as means and standard deviations, we will use the methods  
8 of Wan and colleagues to estimate means and standard deviations from reported measures such as medians  
9 and interquartile or overall ranges.[50] Effect estimates derived from cluster randomized trials will be  
10 pooled using the reported effect adjusted for clustering, or if not available, a corrected estimate accounting  
11 for an estimated design effect.[51]

### 22 *Data syntheses and analyses*

24 Our approach to analysis will follow previous recommendations, whereby sequential and  
25 complimentary techniques will be used to estimate the pooled effects of prehabilitation and its  
26 components.[20,52]

### 30 Pairwise meta-analysis

32 Pair-wise meta-analysis will first be used to estimate whether any prehabilitation intervention, or  
33 prespecified components (exercise, nutrition, psychosocial or cognitive) improve critical outcomes  
34 compared to standard care or comparator interventions (separately). All meta-analysis models will use  
35 random-effects, as existing knowledge suggests that assumptions for fixed-effect meta-analysis will not be  
36 met (in particular due to heterogeneity related to different surgical procedures).[18] We will use the  
37 Hartung-Knapp-Sidik-Jonkman method to derive appropriate CIs.[53] Between-study variance will be  
38 estimated using the restricted maximum likelihood method and its 95% CI using the Q-profile  
39 approach.[54-56] We will also calculate the  $I^2$  statistic to quantify the percentage of variability due to  
40 between-study heterogeneity rather than random error. If substantial heterogeneity exists, sources will be  
41 explored using subgroup analysis and meta-regression, based on prespecified postulated effect modifiers  
42 (type of surgery, age, type of prehabilitation, baseline functional status).

### 56 Assessment of assumptions for NMA and CNMA

1  
2  
3 We will assess for transitivity (the assumption that two components can be validly compared via  
4 common control condition) both visually and statistically. Visual evaluation will be conducted via  
5 assessment of the distribution of effect modifiers in tabular and graphical presentations across treatment  
6 comparisons. We will visually inspect similarity of the distribution of the following effect modifiers: type  
7 of surgery, age, baseline functional status, comorbidity or American Society of Anesthesiologists' Score,  
8 presence of cancer, presence of malnutrition. Statistical assessment of transitivity will involve a global  
9 assessment of consistency using the design-by-treatment interaction model,[57] and a local assessment  
10 through the node-splitting approach.[58] For the CNMA, we will assess the additivity assumption using the  
11 method of Rucker and colleagues based on the difference in Q statistics between the additive CNMA and  
12 standard NMA model.[24]

### 23 24 25 26 Network meta-analysis

27  
28 Next, we will conduct a standard NMA, also referred to as a full interaction model in CNMA,[20]  
29 and generate network plots to visually explore the available evidence base. We will perform a random-  
30 effects NMA assuming a common between-studies variance ( $\tau^2$ ) across the whole network, using the  
31 restricted maximum likelihood method.[59] We will estimate summary effect measures (odds ratios, mean  
32 differences, weighted mean differences) along with 95% CIs and 95% prediction intervals. To assess the  
33 magnitude of heterogeneity we will compare the estimated  $\tau^2$  with an empirical distribution for  
34 dichotomous data.[60] We will obtain a treatment hierarchy using P-scores, which take values between 0  
35 and 1, and which is based on the estimated treatment effects and their associated uncertainty.[61]

### 36 37 38 39 40 41 42 43 44 45 46 47 Component network meta-analysis

48  
49 We will use an additive CNMA model to evaluate the influence of the individual components,  
50 where each component has its own effect, and the total effect of an intervention will be equal to the sum of  
51 the relative component effects. It should be noted that common components in comparisons of interventions  
52 cancel out (i.e., *mean difference*<sub>A + B vs. A + C</sub> is identical to the effect of *mean difference*<sub>B vs. C</sub>).

## Model Implementation

All analyses will be performed in the R programming language (R Foundation for Statistical Computing, Vienna, Austria). We will fit pair-wise meta-analysis models in R using the *meta* package,[62] and will conduct all NMA, CNMAs, design-by-treatment interaction models, node-splitting models, subgroup and sensitivity analyses in R using the *netmeta* package.[63]

### *Sensitivity analyses*

If adequate data are available and network geometry is not substantively changed, we will re-estimate our additive CNMA models limited to low risk of bias trials only.

While we have prespecified, based on prior umbrella review, exercise, nutrition, psychosocial and cognitive interventions as the components that we will compare using CNMA, theoretically each component can be further subdivided. If adequate data are available, we will explore CNMA analyses by subcomponent (e.g., exercise: aerobic, strength, other; nutrition: supplementation, counselling, other; psychosocial: anxiety reduction, mood stabilization, other; although ultimately some subcomponents listed here may require further merging or disaggregation based on their distribution between studies) to further refine our understanding of intervention component efficacy. If missing data are present and unaccounted for in primary reports, we will complete sensitivity analyses using appropriate techniques to impute missing values and assess consistency between primary and imputed results.

### *Ethics and Dissemination*

Results will be disseminated through presentations at scientific conferences and submission of peer-reviewed manuscripts. Using our iKT approach, we will also perform targeted dissemination to partner organizations and via our investigator network. Social and traditional media will also be used to spread results to a larger audience. Ethics approval was not required as this study does not require participation of human subjects.

## **Limitations**

Component network meta-analysis requires specific assumptions and acknowledgement of limitations. Assumptions underlying CNMA are similar to those of network meta-analyses,[64] and will

1  
2  
3 require assessment prior to analysis. Because network comparisons (direct and indirect) depend upon a  
4 common reference condition (i.e., standard care), detailed description of standard care conditions in existing  
5 trials will be described to allow meaningful clinical interpretation of results. Should assumption-violating  
6 differences between RCTs be identified, we will incorporate baseline risk meta-regression (i.e., control rate  
7 meta-regression) in our analyses.[65] Some indirect (i.e., via the standard care reference condition)  
8 comparisons may not be possible due to a lack of relevant RCT comparators. We have defined our  
9 components as exercise, nutrition, psychosocial and cognitive. However, we recognize that these  
10 components could be subdivided further, and have therefore pre-specified exploratory investigation of sub-  
11 components (e.g., strength vs aerobic exercise) should adequate data be available. Sparse data can also limit  
12 the power to detect meaningful differences, especially in CNMA models with interactions and for meta-  
13 regression.[20,66,67]  
14  
15  
16  
17  
18  
19  
20  
21  
22  
23  
24  
25  
26  
27  
28  
29  
30  
31  
32  
33  
34  
35  
36  
37  
38  
39  
40  
41  
42  
43  
44  
45  
46  
47  
48  
49  
50  
51  
52  
53  
54  
55  
56  
57  
58  
59  
60

1  
2  
3  
4 **Collaborators:** Prehabilitation Knowledge Network: Shamsuddin Akhtar, Marlis Atkins, Sylvie Aucoin,  
5 Rebecca Auer, Carlota Basualdo-Hammond, Paul Beaulé, Mary Brindle, Gregory Bryson, Franco Carli,  
6 Antoine Eskander, Dean Fergusson, Julio Fiore Jr., Alan Forster, Melani Gillam, Leah Gramlich, Jayna  
7 Holroyd-Leduc, Timothy Jackson, Rachel Khadaroo, Manoj Lalu, Cameron Love, Guillaume Martel,  
8 Colin McCartney, Dolores McKeen, Amanda Meliambro, Husein Moloo, Ronald Moore, John  
9 Muscedere, Julie Nantel, Stephane Poitras, Celena Scheede-Bergdahl, Risa Shorr, Monica Taljaard, Tom  
10 Wallace, Duminda Wijeyesundera  
11

12  
13 Please include the collaborator listing on the manuscript and associated pubmed citation.

14 **Author's Contributions:** DIM is the Principal Investigator. DIM, MG, LB, BH, AA, CG, KB, ALG, JS,  
15 and EH were involved in the conception and design of the study. DIM wrote the initial draft of the  
16 protocol and this manuscript. All authors provided critical input regarding the design of the study. DM,  
17 BH, and AA designed the data analysis plan. All authors revised the protocol critically for important  
18 intellectual content and approved the final version to be published. DIM, MG, LB, BH, AA, CG, KB,  
19 ALG, JS, and EH agree to be accountable for all aspects of the work in ensuring that questions related to  
20 the accuracy or integrity of any part of the work are appropriately investigated and resolved. All authors,  
21 including the Prehabilitation Knowledge Network, have critically reviewed and approved the final  
22 protocol.  
23  
24

25 **Funding Statement:** This work was supported by The Canadian Institutes of Health Research [179837].  
26

27 **Competing Interests Statement:** There are no competing interests to declare.  
28

29 **Acknowledgements:** DIM receives salary support from The Ottawa Hospital Anesthesia Alternate Funds  
30 Association and a Research Chair from the University of Ottawa Faculty of Medicine.  
31  
32  
33  
34  
35  
36  
37  
38  
39  
40  
41  
42  
43  
44  
45  
46  
47  
48  
49  
50  
51  
52  
53  
54  
55  
56  
57  
58  
59  
60

## References

1. Meara JG, Leather AJM, Hagander L, et al. Global Surgery 2030: evidence and solutions for achieving health, welfare, and economic development. *Lancet*. 2015;386(9993):569-624. doi:10.1016/S0140-6736(15)60160-X
2. Shrima MG, Bickler SW, Alkire BC, Mock C. Global burden of surgical disease: an estimation from the provider perspective. *Lancet Glob Heal*. 2015;3 Suppl 2:S8-9. doi:10.1016/S2214-109X(14)70384-5
3. *Number, Percentage and Average Acute Length of Stay for Top 10 High-Volume Inpatient Surgeries by Province/Territory, HMDB, 2015–2016.*; 2017. <https://www.cihi.ca/en/quick-stats>
4. Shaw J, Beasley E, Hladkovicz E, et al. A survey of older people after major surgery: Prioritization of routine and patient-reported postoperative outcome measures. In: *Ottawa Quality & Patient Safety Conference.* ; 2018.
5. Devereaux PJ, Chan MT V, Alonso-Coello P, et al. Association between postoperative troponin levels and 30-day mortality among patients undergoing noncardiac surgery. *JAMA*. 2012;307(21):2295-2304. doi:10.1001/jama.2012.5502
6. Wijeyesundera DN, Pearse RM, Shulman MA, et al. Assessment of functional capacity before major non-cardiac surgery: an international, prospective cohort study. *Lancet (London, England)*. 2018;391(10140):2631-2640. doi:10.1016/S0140-6736(18)31131-0
7. Pearse RM, Moreno RP, Bauer P, et al. Mortality after surgery in Europe: a 7 day cohort study. *Lancet*. 2012;380(9847):1059-1065. doi:10.1016/S0140-6736(12)61148-9
8. Etzioni DA, Liu JH, Maggard MA, Ko CY. The aging population and its impact on the surgery workforce. *Ann Surg*. 2003;238(2):170-177. doi:10.1097/01.SLA.0000081085.98792.3d
9. Fowler AJ, Abbott TEF, Prowle J, Pearse RM. Age of patients undergoing surgery. *Br J Surg*. 2019;106(8):1012-1018. doi:10.1002/bjs.11148
10. Berian JR, Mohanty S, Ko CY, Rosenthal RA, Robinson TN. Association of Loss of Independence

- 1  
2  
3 With Readmission and Death After Discharge in Older Patients After Surgical Procedures. *JAMA*  
4 *Surg.* 2016;151(9):e161689. doi:10.1001/jamasurg.2016.1689  
5  
6  
7  
8 11. McIsaac DI, Taljaard M, Bryson GL, et al. Frailty as a Predictor of Death or New Disability After  
9 Surgery: A Prospective Cohort Study. *Ann Surg.* 2020;271(2):283-289.  
10  
11 doi:10.1097/SLA.0000000000002967  
12  
13  
14 12. Shulman MA, Myles PS, Chan MT V., McIlroy DR, Wallace S, Ponsford J. Measurement of  
15 Disability-free Survival after Surgery. *Anesthesiology.* 2015;122(3):524-536.  
16  
17 doi:10.1097/ALN.0000000000000586  
18  
19  
20 13. Minnella EM, Carli F. Multi-modal prehabilitation : addressing the why , when , what , how , who  
21 and where next ? 2019;74:20-26. doi:10.1111/anae.14505  
22  
23  
24 14. Carli F, Ferreira V. Prehabilitation: a new area of integration between geriatricians,  
25 anesthesiologists, and exercise therapists. *Aging Clin Exp Res.* 2018;30(3):241-244.  
26  
27 doi:10.1007/s40520-017-0875-8  
28  
29  
30 15. The Anaesthesia and Perioperative Care Priority Setting Partnership. Published 2015. Accessed  
31 August 27, 2015. <http://niaa.org.uk/Results#pt>  
32  
33  
34 16. *The Top 10 Are:*; 2019. Accessed February 11, 2020. <https://www.car-psp.ca/top-10>  
35  
36  
37 17. *Strong for Surgery.* [https://www.facs.org/quality-programs/strong-for-](https://www.facs.org/quality-programs/strong-for-surgery/patients/prehabilitation)  
38 [surgery/patients/prehabilitation](https://www.facs.org/quality-programs/strong-for-surgery/patients/prehabilitation)  
39  
40  
41 18. McIsaac DI, Gill M, Boland L, et al. Prehabilitation in adult patients undergoing surgery: an  
42 umbrella review of systematic reviews. *Br J Anaesth.* 2022;128(2):244-257.  
43  
44 doi:10.1016/j.bja.2021.11.014  
45  
46  
47 19. Shea BJ, Reeves BC, Wells G, et al. AMSTAR 2: a critical appraisal tool for systematic reviews  
48 that include randomised or non-randomised studies of healthcare interventions, or both. *BMJ.*  
49  
50 Published online September 21, 2017;j4008. doi:10.1136/bmj.j4008  
51  
52  
53 20. Welton NJ, Caldwell DM, Adamopoulos E, Vedhara K. Mixed treatment comparison meta-  
54 analysis of complex interventions: Psychological interventions in coronary heart disease. *Am J*  
55  
56  
57  
58  
59

- 1  
2  
3 *Epidemiol.* 2009;169(9):1158-1165. doi:10.1093/aje/kwp014  
4  
5 21. Caldwell DM, Welton NJ. Approaches for synthesising complex mental health interventions in  
6 meta-analysis. *Evid Based Ment Health.* 2016;19(1):16-21. doi:10.1136/eb-2015-102275  
7  
8  
9 22. Moher D, Shamseer L, Clarke M, et al. Preferred reporting items for systematic review and meta-  
10 analysis protocols (PRISMA-P) 2015 statement. *Syst Rev.* 2015;4(1):1. doi:10.1186/2046-4053-4-  
11 1  
12  
13  
14  
15 23. Hutton B, Salanti G, Caldwell DM, et al. The PRISMA extension statement for reporting of  
16 systematic reviews incorporating network meta-analyses of health care interventions: checklist and  
17 explanations. *Ann Intern Med.* 2015;162(11):777-784. doi:10.7326/M14-2385  
18  
19  
20  
21  
22 24. Rücker G, Petropoulou M, Schwarzer G. Network meta-analysis of multicomponent interventions.  
23 *Biometrical J.* 2020;62(3):808-821. doi:10.1002/bimj.201800167  
24  
25  
26 25. Julian Higgins, Toby Lasserson, Jackie Chandler, David Tovey, James Thomas, Ella Flemyng RC.  
27 *Methodological Expectations of Cochrane Intervention Reviews (MECIR). Standards for the*  
28 *Conduct and Reporting of New Cochrane Intervention Reviews, Reporting of Protocols and the*  
29 *Planning, Conduct and Reporting of Updates.* Cochrane Collaboration; 2021.  
30  
31 <https://community.cochrane.org/mecir-manual>  
32  
33  
34  
35  
36 26. Higgins J, Thomas J, Chandler J, et al., eds. *Cochrane Handbook for Systematic Reviews of*  
37 *Interventions.* 2nd ed. John Wiley & Sons; 2019.  
38  
39  
40  
41 27. Moher D, Liberati A, Tetzlaff J, Altman DG. Preferred reporting items for systematic reviews and  
42 meta-analyses: the PRISMA statement. *PLoS Med.* 2009;6(7):e1000097.  
43  
44  
45 doi:10.1371/journal.pmed.1000097  
46  
47  
48 28. Page MJ, McKenzie JE, Bossuyt PM, et al. The PRISMA 2020 statement: An updated guideline  
49 for reporting systematic reviews. *BMJ.* 2021;372. doi:10.1136/bmj.n71  
50  
51  
52 29. Higgins J, Thomas J, Chandler J, et al., eds. *Cochrane Handbook for Systematic Reviews of*  
53 *Interventions.* 6th ed. Cochrane Collaboration; 2019.  
54  
55  
56 30. Boland L, Kothari A, McCutcheon C, Graham ID. Building an integrated knowledge translation  
57  
58  
59  
60



- (IKT) evidence base: colloquium proceedings and research direction. *Heal Res Policy Syst*. 2020;18(1):8. doi:10.1186/s12961-019-0521-3
31. Graham ID, Kothari A, McCutcheon C. Moving knowledge into action for more effective practice, programmes and policy: protocol for a research programme on integrated knowledge translation. *Implement Sci*. 2018;13(1):22. doi:10.1186/s13012-017-0700-y
32. Straus SE, Tetroe J, Graham I, eds. *Knowledge Translation in Health Care: Moving from Evidence to Practice*. 2nd ed. BMJ Publishing Group; 2013.
33. Staniszewska S, Brett J, Simera I, et al. GRIPP2 reporting checklists: tools to improve reporting of patient and public involvement in research. *BMJ*. Published online August 2, 2017;j3453. doi:10.1136/bmj.j3453
34. Gillis C, Buhler K, Bresee L, et al. Effects of Nutritional Prehabilitation, With and Without Exercise, on Outcomes of Patients Who Undergo Colorectal Surgery: A Systematic Review and Meta-analysis. *Gastroenterology*. 2018;155(2):391-410.e4. doi:10.1053/j.gastro.2018.05.012
35. Luther A, Gabriel J, Watson RP, Francis NK. The Impact of Total Body Prehabilitation on Post-Operative Outcomes After Major Abdominal Surgery: A Systematic Review. *World J Surg*. Published online 2018. doi:10.1007/s00268-018-4569-y
36. McIsaac DI, Gill M, Boland L, et al. Prehabilitation in adult surgical patients: an umbrella review of systematic reviews. *Ann Surg*. 2021;Submitted.
37. ERAS Spotlight. Alberta Health Services. Accessed February 11, 2020. <https://krs.libguides.com/surgery/eras>
38. Wind J, Polle SW, Fung Kon Jin PHP, et al. Systematic review of enhanced recovery programmes in colonic surgery. *Br J Surg*. 2006;93(7):800-809. doi:10.1002/bjs.5384
39. Bilimoria KY, Liu Y, Paruch JL, et al. Development and evaluation of the universal ACS NSQIP surgical risk calculator: a decision aid and informed consent tool for patients and surgeons. *J Am Coll Surg*. 2013;217(5):833-42.e1-3. doi:10.1016/j.jamcollsurg.2013.07.385
40. Haller G, Bampoe S, Cook T, et al. Systematic review and consensus definitions for the

- 1  
2  
3 Standardised Endpoints in Perioperative Medicine initiative: clinical indicators. *Br J Anaesth*.  
4  
5 2019;123(2):228-237. doi:10.1016/j.bja.2019.04.041  
6  
7 41. Stiefel M, Nolan K, Steifel M NK. A Guide to Measuring the Triple Aim : Population Health,  
8  
9 Experience of Care, and Per Capita Cost. IHI Innovation Series white paper.  
10  
11 42. Berwick DM, Nolan TW, Whittington J. The Triple Aim: Care, Health, And Cost. *Health Aff*.  
12  
13 2008;3(3):759-769. doi:10.1377/hlthaff.27.3.759  
14  
15 43. Sampson M, McGowan J, Lefebvre C, Moher D, Grimshaw JM. *PRESS: Peer Review of*  
16  
17 *Electronic Search Strategies*.; 2008. doi:10.1111/1540-4560.00063  
18  
19 44. CADTH. Grey matters: a practical tool for searching health-related grey literature. Published  
20  
21 2018. Accessed September 2, 2021. <https://www.cadth.ca/resources/finding-evidence>  
22  
23 45. The Cochrane Collaboration. *RoB 2 Guidance: Revised Cochrane Risk-of-Bias Tool for*  
24  
25 *Randomized Trials (RoB 2)*. (Higgins JP, Savović J, Page MJ, Sterne JA, eds.). Cochrane  
26  
27 Collaboration; 2019. [https://methods.cochrane.org/bias/resources/rob-2-revised-cochrane-risk-](https://methods.cochrane.org/bias/resources/rob-2-revised-cochrane-risk-bias-tool-randomized-trials)  
28  
29 [bias-tool-randomized-trials](https://methods.cochrane.org/bias/resources/rob-2-revised-cochrane-risk-bias-tool-randomized-trials)  
30  
31 46. Sterne JAC, Sutton AJ, Ioannidis JPA, et al. Recommendations for examining and interpreting  
32  
33 funnel plot asymmetry in meta-analyses of randomised controlled trials. *BMJ*. 2011;343.  
34  
35 doi:10.1136/bmj.d4002  
36  
37 47. Guyatt GH, Oxman AD, Vist GE, et al. GRADE: an emerging consensus on rating quality of  
38  
39 evidence and strength of recommendations. *BMJ*. 2008;336(7650):924-926.  
40  
41 doi:10.1136/bmj.39489.470347.AD  
42  
43 48. Brignardello-Petersen R, Bonner A, Alexander PE, et al. Advances in the GRADE approach to  
44  
45 rate the certainty in estimates from a network meta-analysis. *J Clin Epidemiol*. 2018;93:36-44.  
46  
47 doi:10.1016/j.jclinepi.2017.10.005  
48  
49 49. Santesso N, Glenton C, Dahm P, et al. GRADE guidelines 26: informative statements to  
50  
51 communicate the findings of systematic reviews of interventions. *J Clin Epidemiol*. 2020;119:126-  
52  
53 135. doi:10.1016/j.jclinepi.2019.10.014  
54  
55  
56  
57  
58  
59  
60

- 1  
2  
3 50. Wan X, Wang W, Liu J, Tong T. Estimating the sample mean and standard deviation from the  
4 sample size, median, range and/or interquartile range. *BMC Med Res Methodol*. 2014;14(1):135.  
5  
6 doi:10.1186/1471-2288-14-135  
7  
8  
9 51. Higgins J, Thomas J, Chandler J, et al. Cochrane Handbook for Systematic Reviews of  
10 Interventions version 6.1 (updated September 2020). *Cochrane*. Published online 2020.  
11  
12  
13 52. Rücker G, Schmitz S, Schwarzer G. Component network meta-analysis compared to a matching  
14 method in a disconnected network: A case study. *Biometrical J*. 2021;63(2):447-461.  
15  
16 doi:10.1002/bimj.201900339  
17  
18  
19 53. Veroniki AA, Jackson D, Bender R, et al. Methods to calculate uncertainty in the estimated overall  
20 effect size from a random-effects meta-analysis. *Res Synth Methods*. 2019;10(1):23-43.  
21  
22 doi:10.1002/jrsm.1319  
23  
24  
25 54. Veroniki AA, Jackson D, Viechtbauer W, et al. Methods to estimate the between-study variance  
26 and its uncertainty in meta-analysis. *Res Synth Methods*. 2016;7(1):55-79. doi:10.1002/jrsm.1164  
27  
28  
29 55. Langan D, Higgins JPT, Jackson D, et al. A comparison of heterogeneity variance estimators in  
30 simulated random-effects meta-analyses. *Res Synth Methods*. 2019;10(1):83-98.  
31  
32 doi:10.1002/jrsm.1316  
33  
34  
35 56. Viechtbauer W. Confidence intervals for the amount of heterogeneity in meta-analysis. *Stat Med*.  
36 2007;26(1):37-52. doi:10.1002/sim.2514  
37  
38  
39 57. White IR, Barrett JK, Jackson D, Higgins JPT. Consistency and inconsistency in network  
40 meta-analysis: model estimation using multivariate meta-regression. *Res Synth Methods*.  
41 2012;3(2):111-125. doi:10.1002/jrsm.1045  
42  
43  
44 58. Dias S, Welton NJ, Caldwell DM, Ades AE. Checking consistency in mixed treatment comparison  
45 meta-analysis. *Stat Med*. 2010;29(7-8):932-944. doi:10.1002/sim.3767  
46  
47  
48 59. Higgins JP, Whitehead A. Borrowing strength from external trials in a meta-analysis. *Stat Med*.  
49 1996;15(24):2733-2749. doi:10.1002/(SICI)1097-0258(19961230)15:24<2733::AID-  
50 SIM562>3.0.CO;2-0  
51  
52  
53  
54  
55  
56  
57  
58  
59  
60

- 1  
2  
3 60. Turner RM, Davey J, Clarke MJ, Thompson SG, Higgins JP. Predicting the extent of  
4 heterogeneity in meta-analysis, using empirical data from the Cochrane Database of Systematic  
5 Reviews. *Int J Epidemiol*. 2012;41(3):818-827. doi:10.1093/ije/dys041  
6  
7  
8  
9 61. Rücker G, Schwarzer G. Ranking treatments in frequentist network meta-analysis works without  
10 resampling methods. *BMC Med Res Methodol*. 2015;15:58. doi:10.1186/s12874-015-0060-8  
11  
12  
13 62. Balduzzi S, Rücker G, Schwarzer G. How to perform a meta-analysis with R: a practical tutorial.  
14 *Evid Based Ment Health*. 2019;22(4):153-160. doi:10.1136/ebmental-2019-300117  
15  
16  
17 63. Schwarzer G, Carpenter JR, Rücker G. *Meta-Analysis with R*. Springer International Publishing;  
18 2015. doi:10.1007/978-3-319-21416-0  
19  
20  
21  
22 64. Donegan S, Williamson P, D'Alessandro U, Tudur Smith C. Assessing key assumptions of  
23 network meta-analysis: a review of methods. *Res Synth Methods*. 2013;4(4):291-323.  
24  
25  
26  
27  
28 65. Dias S, Sutton A, Welton N, Ades A. *NICE DSU Technical Support Document 2: A Generalised*  
29  
30  
31  
32  
33  
34  
35 66. Melendez-Torres GJ, Bonell C, Thomas J. Emergent approaches to the meta-analysis of multiple  
36 heterogeneous complex interventions Data collection, quality, and reporting. *BMC Med Res*  
37  
38  
39  
40  
41 67. Hempel S, Miles JN V, Booth MJ, Wang Z, Morton SC, Shekelle PG. Risk of bias: a simulation  
42  
43  
44  
45  
46  
47  
48  
49  
50  
51  
52  
53  
54  
55  
56  
57  
58  
59  
60

## Supplementary file 1 – Search strategies

Ovid MEDLINE(R) ALL

- 1 (prehab\* or pre-hab\*).tw,kf.
- 2 (preoperative\* rehabilitation or preoperative\* training).tw,kw.
- 3 ((perioperat\* or peri operat\*) adj3 (exercis\* or physiotherap\* or physical therapy or diet or nutrition\* or physical activit\* or counsel?ing)).tw.
- 4 Preoperative Exercise/
- 5 ((exercise\* or diet or nutrition\* counsel?ing) and (surgery or surgical)).ti.
- 6 ((preoperat\* or pre-operat\* or presurg\* or pre-surg\*) adj3 (exercis\* or physiotherap\* or physical therapy or diet or nutrition\* or physical activit\* or counsel?ing or conditioning)).tw,kf.
- 7 ((preoperat\* or pre-operat\* or presurg\* or pre-surg\*) adj5 ((psychological or psychosocial or cognitive) adj3 (intervention\* or therap\*))).tw,kf.
- 8 ((preoperat\* or pre-operat\* or presurg\* or pre-surg\*) adj5 (diet or dietary or nutrit\*)).tw,kf.
- 2008
- 9 ((preoperat\* or pre-operat\* or presurg\* or pre-surg\*) adj5 (resistance or strength or weight or muscle) adj2 training).tw,kf.
- 10 ((preoperat\* or pre-operat\* or presurg\* or pre-surg\*) adj5 (food adj3 (counsel\* or support\* or modif\*))).tw,kf.
- 11 ((preoperat\* or pre-operat\* or presurg\* or pre-surg\*) adj5 ((energy or protein) adj3 supplement\*)).tw,kf.
- 12 ((preoperat\* or pre-operat\* or presurg\* or pre-surg\*) adj5 (exercise or exercises or stretch\* or aerobic\* or physical activit\*)).tw,kf.
- 13 ((preoperat\* or pre-operat\* or presurg\* or pre-surg\*) adj5 (cbt or cognitive behavio?r\*)).tw,kf.
- 14 ((preoperat\* or pre-operat\* or presurg\* or pre-surg\*) adj2 counsel\*).tw,kf.
- 15 ((preoperat\* or pre-operat\* or presurg\* or pre-surg\*) adj2 supplement\*).tw,kf.
- 16 or/1-15
- 17 \*Preoperative Care/ or \*Preoperative Period/ or (preoperat\* or pre-operat\* or presurg\* or pre-surg\*).ti.
- 18 exp Exercise Therapy/ or Exercise/
- 19 Physical Fitness/
- 20 (exercise or exercises or stretch\* or aerobic\* or physical activit\*).tw,kw.
- 21 ((resistance or strength or weight or muscle) adj2 training).tw.
- 22 diet therapy/ or Nutrition Therapy/ or Nutritional Support/
- 23 (diet or dietary or nutrit\*).tw,kw.
- 24 (food adj3 (counsel\* or support\* or modif\*)).tw.
- 25 ((energy or protein) adj3 supplement\*).tw.
- 26 Dietary Supplements/
- 27 Physical Therapy Modalities/ or (physical therap\* or physiotherap\*).tw,kw.
- 28 Counseling/ or counsel?ing.tw,kw.
- 29 behavior therapy/ or cognitive behavioral therapy/ or Psychotherapy/ or Relaxation Therapy/
- 30 Stress, Psychological/rh, th
- 31 ((psychological or psychosocial or cognitive) adj3 (intervention\* or therap\*)).tw.

1  
2  
3 32 or/18-31  
4 33 17 and 32  
5 34 16 or 33  
6 35 randomized controlled trial.pt.  
7 36 controlled clinical trial.pt.  
8 37 random\*.tw.  
9 38 placebo.ab.  
10 39 clinical trials as topic.sh.  
11 40 trial.ti.  
12 41 or/35-40  
13 42 exp animals/ not humans/  
14 43 (infant/ or child/ or adolescent/) not adult/  
15 44 41 not (42 or 43)  
16 45 34 and 44  
17 46 45 use medall

#### Embase Classic+Embase

1 (prehab\* or pre-hab\*).mp.  
2 (preoperative\* rehabilitation or preoperative\* training).tw.  
3 ((perioperat\* or peri operat\*) adj3 (exercis\* or physiotherap\* or physical therapy or diet or  
4 nutrition\* or physical activit\* or counsel?ing)).tw.  
5 ((preoperat\* or pre-operat\* or presurg\* or pre-surg\*) adj5 (exercis\* or physiotherap\* or physical  
6 therapy or diet or nutrition\* or physical activit\* or counsel?ing or conditioning)).tw.  
7 ((preoperat\* or pre-operat\* or presurg\* or pre-surg\*) adj5 (diet or dietary or nutrit\*)).tw.  
8 ((preoperat\* or pre-operat\* or presurg\* or pre-surg\*) adj5 ((psychological or psychosocial or  
9 cognitive) adj3 (intervention\* or therap\*))).tw.  
10 ((preoperat\* or pre-operat\* or presurg\* or pre-surg\*) adj5 (resistance or strength or weight or  
11 muscle) adj2 training).tw.  
12 ((preoperat\* or pre-operat\* or presurg\* or pre-surg\*) adj5 (food adj3 (counsel\* or support\* or  
13 modif\*))).tw.  
14 ((preoperat\* or pre-operat\* or presurg\* or pre-surg\*) adj5 ((energy or protein) adj3  
15 supplement\*)).tw.  
16 ((preoperat\* or pre-operat\* or presurg\* or pre-surg\*) adj5 (stretch\* or aerobic\*)).tw.  
17 ((exercise\* or diet or nutrition\* counsel?ing) and (surgery or surgical)).ti.  
18 ((preoperat\* or pre-operat\* or presurg\* or pre-surg\*) adj5 (cbt or cognitive behavio?r\*)).tw.  
19 ((preoperat\* or pre-operat\* or presurg\* or pre-surg\*) adj2 counsel\*).tw.  
20 ((preoperat\* or pre-operat\* or presurg\* or pre-surg\*) adj2 supplement\*).tw.  
21 or/1-14  
22 \*preoperative care/ or \*preoperative period/ or (preoperat\* or pre-operat\* or presurg\* or pre-  
23 surg\*).ti.  
24 exp \*kinesiotherapy/  
25 exp \*exercise/  
26 (exercise or exercises or stretch\* or aerobic\* or physical activit\*).ti.  
27 ((resistance or strength or weight or muscle) adj2 training).ti.  
28 diet therapy/ or diet supplementation/  
29 (diet or dietary or nutrit\*).ti.

23 (food adj3 (counsel\* or support\* or modif\*)).ti.  
 24 ((energy or protein) adj3 supplement\*).tw.  
 25 physiotherapy/  
 26 (physical therap\* or physiotherap\*).ti.  
 27 counseling/ or nutritional counseling/  
 28 behavior therapy/  
 29 cognitive behavioral therapy/ or cognitive therapy/  
 30 psychotherapy/  
 31 ((psychological or psychosocial or cognitive) adj3 (intervention\* or therap\*)).ti.  
 32 or/17-31  
 33 16 and 32  
 34 15 or 33  
 35 double-blind\*.mp. or placebo\*.tw. or blind\*.tw. or trial.ti.  
 36 random\*.ti.  
 37 (random\* adj2 (trial\* or stud\*)).tw.  
 38 35 or 36 or 37  
 39 34 and 38  
 40 (child/ or childhood/ or infant/) not adult/  
 41 (exp animal/ or nonhuman/) not exp human/  
 42 39 not (40 or 41)

#### EBM Reviews - Cochrane Central Register of Controlled Trials

1 (prehab\* or pre-hab\*).tw,kw.  
 2 (preoperative\* rehabilitation or preoperative\* training).tw,kw.  
 3 ((perioperat\* or peri operat\*) adj3 (exercis\* or physiotherap\* or physical therapy or diet or  
 nutrition\* or physical activit\* or counsel?ing)).tw.  
 4 ((preoperat\* or pre-operat\* or presurg\* or pre-surg\*) adj2 (exercis\* or physiotherap\* or physical  
 therapy or diet or nutrition\* or physical activit\* or counsel?ing or conditioning)).tw.  
 5 ((preoperat\* or pre-operat\* or presurg\* or pre-surg\*) adj4 (exercis\* or physiotherap\* or physical  
 therapy or diet or nutrition\* or physical activit\* or counsel?ing or conditioning)).ti.  
 6 Preoperative Exercise/  
 7 ((exercise\* or diet or nutrition\* counsel?ing) and (surgery or surgical)).ti.  
 8 ((preoperat\* or pre-operat\* or presurg\* or pre-surg\*) adj5 ((psychological or psychosocial or  
 cognitive) adj3 (intervention\* or therap\*))).tw.  
 9 ((preoperat\* or pre-operat\* or presurg\* or pre-surg\*) adj2 (diet or dietary or nutrit\*)).tw.  
 10 ((preoperat\* or pre-operat\* or presurg\* or pre-surg\*) adj5 (resistance or strength or weight or  
 muscle) adj2 training).tw.  
 11 ((preoperat\* or pre-operat\* or presurg\* or pre-surg\*) adj5 (food adj3 (counsel\* or support\* or  
 modif\*))).tw.  
 12 ((preoperat\* or pre-operat\* or presurg\* or pre-surg\*) adj5 ((energy or protein) adj3  
 supplement\*)).tw.  
 13 ((preoperat\* or pre-operat\* or presurg\* or pre-surg\*) adj3 (exercise or exercises or stretch\* or  
 aerobic\* or physical activit\*)).tw.  
 14 ((preoperat\* or pre-operat\* or presurg\* or pre-surg\*) adj3 (cbt or cognitive behavio?r\*)).tw.  
 15 ((preoperat\* or pre-operat\* or presurg\* or pre-surg\*) adj2 counsel\*).tw.  
 16 ((preoperat\* or pre-operat\* or presurg\* or pre-surg\*) adj2 supplement\*).tw.

- 1  
2  
3 17 or/1-16  
4 18 (infant/ or child/ or adolescent/) not adult/  
5 19 17 not 18  
6  
7 20 remove duplicates from 19  
8  
9  
10

11 **APA PsycInfo**  
12  
13

- 14 1 (prehab\* or pre-hab\*).tw.  
15  
16 2 (preoperative\* rehabilitation or preoperative\* training).tw.  
17 3 ((perioperat\* or peri operat\*) adj3 (exercis\* or physiotherap\* or physical therapy or diet or  
18 nutrition\* or physical activit\* or counsel?ing)).tw.  
19 4 ((exercise\* or diet or nutrition\* counsel?ing) and (surgery or surgical)).ti.  
20 5 1 or 2 or 3 or 4  
21 6 surgical patients/ or (preoperat\* or pre-operat\* or presurg\* or pre-surg\*).ti.  
22 7 exp exercise/ or physical activity/ or physical fitness/  
23 8 (exercise or exercises or stretch\* or aerobic\* or physical activit\*).tw.  
24 9 ((resistance or strength or weight or muscle) adj2 training).tw.  
25 10 Diets/  
26 11 Nutrition/ or Dietary Supplements/  
27 12 (diet or dietary or nutrit\*).tw.  
28 13 (food adj3 (counsel\* or support\* or modif\*)).tw.  
29 14 ((energy or protein) adj3 supplement\*).tw.  
30 15 physical therapy/ or physical treatment methods/  
31 16 (physical therap\* or physiotherap\*).tw.  
32 17 Counseling/  
33 18 counsel?ing.tw.  
34 19 Behavior Therapy/ or Cognitive Behavior Therapy/ or Cognitive Therapy/  
35 20 Psychotherapy/  
36 21 ((psychological or psychosocial or cognitive) adj3 (intervention\* or therap\*)).tw.  
37 22 or/7-21  
38 23 6 and 22  
39 24 5 or 23  
40 25 exp Clinical Trials/ or Placebo/ or (random\* or sham or placebo\* or ((singl\* or doubl\*) adj  
41 (blind\* or dumm\* or mask\*)) or ((tripl\* or trebl\*) adj (blind\* or dumm\* or mask\*)) or (control\* adj3  
42 (study or studies or trial\* or group\*)) or Nonrandom\* or non random\* or non-random\* or quasi-random\*  
43 or quasirandom\* or allocated or ((open label or open-label) adj5 (study or studies or trial\*)) or  
44 ((equivalence or superiority or non-inferiority or noninferiority) adj3 (study or studies or trial\*)) or  
45 ((pragmatic or practical) adj3 trial\*) or ((quasiexperimental or quasi-experimental) adj3 (study or studies  
46 or trial\*)) or (phase adj3 (III or "3") adj3 (study or studies or trial\*))).ti,ab,hw.  
47  
48  
49  
50  
51 26 24 and 25  
52  
53  
54

55 **CinahlComplete**  
56  
57  
58  
59  
60



| #   | Query                                                                                                                                                                                                                                                                                                      |
|-----|------------------------------------------------------------------------------------------------------------------------------------------------------------------------------------------------------------------------------------------------------------------------------------------------------------|
| S1  | (MH "Prehabilitation")                                                                                                                                                                                                                                                                                     |
| S2  | TI ( (prehab* or pre-hab*) ) OR AB ( (prehab* or pre-hab*) )                                                                                                                                                                                                                                               |
| S3  | TI ( (preoperative* rehabilitation or preoperative* training) ) OR AB ( (preoperative* rehabilitation or preoperative* training) )                                                                                                                                                                         |
| S4  | TI ( ((perioperat* or peri operat*) N3 (exercis* or physiotherap* or physical therapy or diet or nutrition* or physical activit* or counsel?ing)) ) OR AB ( ((perioperat* or peri operat*) N3 (exercis* or physiotherap* or physical therapy or diet or nutrition* or physical activit* or counsel?ing)) ) |
| S5  | S1 OR S2 OR S3 OR S4                                                                                                                                                                                                                                                                                       |
| S6  | (MH "Preoperative Care") or (MH "Preoperative Period") or TI (preoperat* or pre-operat* or presurg* or pre-surg)                                                                                                                                                                                           |
| S7  | (MH "Therapeutic Exercise+")                                                                                                                                                                                                                                                                               |
| S8  | (MH "Exercise+")                                                                                                                                                                                                                                                                                           |
| S9  | (MH "Physical Fitness+")                                                                                                                                                                                                                                                                                   |
| S10 | TI ( (exercise or exercises or stretch* or aerobic* or physical activit*) ) OR AB ( (exercise or exercises or stretch* or aerobic* or physical activit*) )                                                                                                                                                 |
| S11 | TI ( (resistance or strength or weight or muscle) N2 training ) OR AB ( (resistance or strength or weight or muscle) N2 training )                                                                                                                                                                         |
| S12 | (MH "Diet Therapy+")                                                                                                                                                                                                                                                                                       |
| S13 | (MH "Nutritional Support+")                                                                                                                                                                                                                                                                                |

- 1  
2  
3  
4 S14 TI ( (diet or dietary or nutrit\*) ) OR AB ( (diet or dietary or nutrit\*) )
- 5  
6  
7 S15 TI ( food N3 (counsel\* or support\* or modif\*) ) OR AB ( food N3 (counsel\* or support\* or modif\*) )
- 8  
9  
10  
11 S16 TI ( (energy or protein) N3 supplement\* ) OR AB ( (energy or protein) N3 supplement\* )
- 12  
13  
14 S17 (MH "Dietary Supplementation")
- 15  
16  
17 S18 (MH "Physical Therapy+")
- 18  
19  
20 S19 (MH "Physical Therapy Service")
- 21  
22  
23 S20 TI ( (physical therap\* or physiotherap\*) ) OR AB ( (physical therap\* or physiotherap\*) )
- 24  
25  
26 S21 (MH "Counseling+")
- 27  
28  
29 S22 TI counsel?ing OR AB counsel?ing
- 30  
31  
32 S23 (MH "Behavior Therapy") OR (MH "Cognitive Therapy")
- 33  
34  
35 S24 (MH "Psychotherapy+")
- 36  
37  
38 S25 TI ( (psychological or psychosocial or cognitive) N3 (intervention\* or therap\*) ) OR AB ( (psychological or psychosocial or cognitive) N3 (intervention\* or therap\*) )
- 39  
40  
41 S26 S7 OR S8 OR S9 OR S10 OR S11 OR S12 OR S13 OR S14 OR S15 OR S16 OR S17 OR S18 OR S19 OR S20 OR S21 OR S22 OR S23 OR S24 OR S25
- 42  
43  
44  
45 S27 S6 AND S26
- 46  
47  
48  
49 S28 TI ( (preoperat\* or pre-operat\* or presurg\* or pre-surg\*) N3 (exercis\* or physiotherap\* or physical therapy or diet or nutrition\* or physical activit\* or counsel?ing or conditioning) ) OR AB ( (preoperat\* or pre-operat\* or presurg\* or pre-surg\*) N3 (exercis\* or physiotherap\* or
- 50  
51  
52  
53  
54  
55  
56  
57  
58  
59  
60

physical therapy or diet or nutrition\* or physical activit\* or  
counsel?ing or conditioning) )

S29 TI ( ((preoperat\* or pre-operat\* or presurg\* or pre-  
surg\*)N5 ((psychological or psychosocial or cognitive) N3  
(intervention\* or therap\*)) ) OR AB ( ((preoperat\* or pre-  
operat\* or presurg\* or pre-surg\*)N5 ((psychological or  
psychosocial or cognitive) N3 (intervention\* or therap\*)) )

S30 TI ( ((preoperat\* or pre-operat\* or presurg\* or pre-surg\*)  
N5 (diet or dietary or nutrit\*)) ) OR AB ( ((preoperat\* or  
pre-operat\* or presurg\* or pre-surg\*) N5 (diet or dietary or  
nutrit\*)) )

S31 TI ( ((preoperat\* or pre-operat\* or presurg\* or pre-surg\*)  
N5 (resistance or strength or weight or muscle) N2 training)  
) OR AB ( ((preoperat\* or pre-operat\* or presurg\* or pre-  
surg\*) N5 (resistance or strength or weight or muscle) N2  
training) )

S32 TI ( ((preoperat\* or pre-operat\* or presurg\* or pre-surg\*)  
N5 ((energy or protein) N3 supplement\*)) ) OR AB ( (  
preoperat\* or pre-operat\* or presurg\* or pre-surg\*) N5  
((energy or protein) N3 supplement\*)) )

S33 TI ( ((preoperat\* or pre-operat\* or presurg\* or pre-surg\*)  
N5 (exercise or exercises or stretch\* or aerobic\* or physical  
activit\*)) ) OR AB ( ((preoperat\* or pre-operat\* or  
presurg\* or pre-surg\*) N5 (exercise or exercises or stretch\*  
or aerobic\* or physical activit\*)) )

S34 TI ( (preoperat\* or pre-operat\* or presurg\* or pre-surg\*)  
N5 (cbt or cognitive behavior\* or cognitive behaviour)) )  
OR AB ( (preoperat\* or pre-operat\* or presurg\* or pre-  
surg\*) N5 (cbt or cognitive behavior\* or cognitive  
behaviour)) )

S35 TI ( ((preoperat\* or pre-operat\* or presurg\* or pre-surg\*)  
N2 counsel\*) ) OR AB ( ((preoperat\* or pre-operat\* or  
presurg\* or pre-surg\*) N2 counsel\*) )

S36 TI ( ((preoperat\* or pre-operat\* or presurg\* or pre-surg\*)  
N2 supplement ) OR AB ( ((preoperat\* or pre-operat\* or  
presurg\* or pre-surg\*) N2 supplement )

1  
2  
3  
4 S37 S5 OR S27 OR S28 OR S29 OR S30 OR S31 OR S32 OR  
5 S33 OR S34 OR S35 OR S36  
6  
7 ( MH ( randomized controlled trials OR double-blind  
8 studies OR single-blind studies OR random assignment OR  
9 pretest-posttest design OR cluster sample ) OR TI (  
10 randomised OR randomized ) OR AB random\* OR TI trial  
11 OR ( (MH (sample size) AND AB (assigned OR allocated  
12 OR control)) ) OR MH ( placebos OR crossover design OR  
13 comparative studies ) OR AB ( (control W5 group) OR  
14 (cluster W3 RCT) OR PT (randomized controlled trial)) )  
15 NOT ( ( MH animals+ OR MH (animal studies) OR TI  
16 (animal model\*) ) NOT MH (human) )  
17 S38  
18  
19 S39 S37 AND S38  
20  
21 S40 (MH "Child+") NOT (MH "Adult+")  
22  
23  
24 S41 S39 NOT S40  
25  
26

---

27  
28  
29  
30  
31  
32 Web of Science  
33  
34  
35

36 (infant/ or child/ or adolescent/) not adult/

37 ((preoperat\* or pre-operat\* or presurg\* or pre-surg\*) N5 (cbt or cognitive behavior\* or cognitive  
38 behaviour)).  
39  
40

- 41  
42 1. (ALL=(prehab\*)) OR ALL=("pre habilitation")  
43  
44 2. (TI=((preoperat\* OR pre-operat\* OR presurg\* OR pre-surg\*) )) AND TI=(exercis\* or physiotherap\*  
45 or physical therapy or diet or nutrition\* or physical activit\* or counsel\* OR condition\*)  
46  
47 3. (TI=((preoperat\* OR pre-operat\* OR presurg\* OR pre-surg\*))) AND TI=(counsel\* OR psych\* OR  
48 behavior therap\* OR behaviour therap\*)  
49  
50 4. (TI=(preoperat\* OR pre-operat\* OR presurg\* OR pre-surg\*)) AND TI=(nutrition OR diet OR  
51 supplement OR dietary)  
52  
53 5. (TI=(exercise\* or diet or nutrition\* counsel\*)) AND TI=(surgery or surgical)  
54  
55 6. (((#1) OR #2) OR #3) OR #4) OR #5  
56  
57  
58  
59  
60

## 7. Search

(TS=(randomised OR randomized OR randomisation OR randomisation OR placebo\* OR (random\* AND (allocat\* OR assign\* ) ) OR (blind\* AND (single OR double OR treble OR triple) )) NOT TS=(animal or animals or pisces or fish or fishes or catfish or catfishes or sheatfish or silurus or arius or heteropneustes or clarias or gariepinus or fathead minnow or fathead minnows or pimephales or promelas or cichlidae or trout or trouts or char or chars or salvelinus or salmo or oncorhynchus or guppy or guppies or millionfish or poecilia or goldfish or goldfishes or carassius or auratus or mullet or mullets or mugil or curema or shark or sharks or cod or cods or gadus or morhua or carp or carps or cyprinus or carpio or killifish or eel or eels or anguilla or zander or sander or lucioperca or stizostedion or turbot or turbots or psetta or flatfish or flatfishes or plaice or pleuronectes or platessa or tilapia or tilapias or oreochromis or sarotherodon or common sole or dover sole or solea or zebrafish or zebrafishes or danio or rerio or seabass or dicentrarchus or labrax or morone or lamprey or lampreys or petromyzon or pumpkinseed or pumpkinseeds or lepomis or gibbosus or herring or clupea or harengus or amphibia or amphibian or amphibians or anura or salientia or frog or frogs or rana or toad or toads or bufo or xenopus or laevis or bombina or epidalea or calamita or salamander or salamanders or newt or newts or triturus or reptilia or reptile or reptiles or bearded dragon or pogona or vitticeps or iguana or iguanas or lizard or lizards or anguis fragilis or turtle or turtles or snakes or snake or aves or bird or birds or quail or quails or coturnix or bobwhite or colinus or virginianus or poultry or poultries or fowl or fowls or chicken or chickens or gallus or zebra finch or taeniopygia or guttata or canary or canaries or serinus or canaria or parakeet or parakeets or grasskeet or parrot or parrots or psittacine or psittacines or shelduck or tadorna or goose or geese or branta or leucopsis or woodlark or lullula or flycatcher or ficedula or hypoleuca or dove or doves or geopelia or cuneata or duck or ducks or greylag or graylag or anser or harrier or circus pygargus or red knot or great knot or calidris or canutus or godwit or limosa or lapponica or meleagris or gallopavo or jackdaw or corvus or monedula or ruff or philomachus or pugnax or lapwing or peewit or plover or vanellus or swan or cygnus or columbianus or bewickii or gull or chroicocephalus or ridibundus or albifrons or great tit or parus or aythya or fuligula or streptopelia or risoria or spoonbill or platalea or leucorodia or blackbird or turdus or merula or blue tit or cyanistes or pigeon or pigeons or columba or pintail or anas or starling or sturnus or owl or athene noctua or pochard or ferina or cockatiel or nymphicus or hollandicus or skylark or alauda or tern or sterna or teal or crecca or oystercatcher or haematopus or ostralegus or shrew or shrews or sorex or araneus or crocidura or russula or european mole or talpa or chiroptera or bat or bats or eptesicus or serotinus or myotis or dasycneme or daubentonii or pipistrelle or pipistrellus or cat or cats or felis or catus or feline or dog or dogs or canis or canine or canines or otter or otters or lutra or badger or badgers or meles or fitchew or fitch or fougart or foulmart or ferrets or ferret or polecat or polecats or mustela or putorius or weasel or weasels or fox or foxes or vulpes or common seal or phoca or vitulina or grey seal or halichoerus or horse or horses or equus or equine or equidae or donkey or donkeys or mule or mules or pig or pigs or swine or swines or hog or hogs or boar or boars or porcine or piglet or piglets or sus or scrofa or llama or llamas or lama or glama or deer or deers or cervus or elaphus or cow or cows or bos taurus or bos indicus or bovine or bull or bulls or cattle or bison or bisons or sheep or sheeps or ovis aries or ovine or lamb or lambs or mouflon or mouflons or goat or goats or capra or caprine or chamois or rupicapra or leporidae or lagomorpha or lagomorph or rabbit or rabbits or oryctolagus or cuniculus or laprine or hares or lepus or rodentia or rodent or rodents or murinae or mouse or mice or mus or musculus or murine or woodmouse or apodemus or rat or rats or rattus or norvegicus or guinea pig or guinea pigs or cavia or porcellus or hamster or hamsters or mesocricetus or cricetus or cricetus or gerbil or gerbils or jird or jirds or meriones or unguiculatus or jerboa or jerboas or jaculus or chinchilla or chinchillas or beaver or beavers or castor fiber or castor canadensis or sciuridae or squirrel or squirrels or sciurus or chipmunk or chipmunks or marmot

1  
2  
3 or marmots or marmota or suslik or susliks or spermophilus or cynomys or cottonrat or cottonrats or  
4 sigmodon or vole or voles or microtus or myodes or glareolus or primate or primates or prosimian or  
5 prosimians or lemur or lemurs or lemuridae or loris or bush baby or bush babies or bushbaby or  
6 bushbabies or galago or galagos or anthropoidea or anthropoids or simian or simians or monkey or  
7 monkeys or marmoset or marmosets or callithrix or cebuella or tamarin or tamarins or saguinus or  
8 leontopithecus or squirrel monkey or squirrel monkeys or saimiri or night monkey or night monkeys or  
9 owl monkey or owl monkeys or douroucoulis or aotus or spider monkey or spider monkeys or ateles or  
10 baboon or baboons or papio or rhesus monkey or macaque or macaca or mulatta or cynomolgus or  
11 fascicularis or green monkey or green monkeys or chlorocebus or vervet or vervets or pygerythrus or  
12 hominoidea or ape or apes or hylobatidae or gibbon or gibbons or siamang or siamangs or nomascus or  
13 symphalangus or hominidae or orangutan or orangutans or pongo or chimpanzee or chimpanzees or pan  
14 troglodytes or bonobo or bonobos or pan paniscus or gorilla or gorillas or troglodytes))

17 8. (#6) AND #7  
18  
19  
20  
21  
22  
23  
24  
25  
26  
27  
28  
29  
30  
31  
32  
33  
34  
35  
36  
37  
38  
39  
40  
41  
42  
43  
44  
45  
46  
47  
48  
49  
50  
51  
52  
53  
54  
55  
56  
57  
58  
59  
60

**Supplementary file 2 – Datapoints extracted from included RCTs**

1. Author
2. Year of publication
3. Countries of origin
4. Study start and end dates
5. Patient partners
  - a. As authors
    - i. Demographics
    - ii. Roles
  - b. As acknowledged collaborators
    - i. Demographics
    - ii. Roles
6. Prehabilitation definition
  - a. In introduction or background
  - b. In methods
7. Prehabilitation characteristics
  - a. Multimodal (y/n)
8. Prehabilitation Components (eg, exercise, nutrition, psychosocial, cognitive)
  - a. Type of exercise
    - i. Unimodal
    - ii. Multimodal
    - iii. Interval training
    - iv. Other
    - v. Components (eg, cardio, strength, stretching, respiratory exercise)
  - b. Type of nutrition
    - i. Counselling
    - ii. Supplementation
    - iii. Combined
    - iv. Other
  - c. Type of psychosocial
    - i. Motivational interviewing
    - ii. Anxiety management
    - iii. Stress management
    - iv. Other
  - d. Type of cognitive
  - e. Other co-interventions
9. Enhanced recovery after surgery (ERAS) (y/n)
10. Weight loss objective (y/n)
11. Duration of prehabilitation
  - a. Average
  - b. Program
    - i. Minimum participation
    - ii. Maximum participation
  - c. Per session
12. Frequency of prehabilitation
13. Intervention time-point
  - a. Preoperative only
  - b. Preoperative plus rehab after surgery
14. Location of prehabilitation

- 1
  - 2
  - 3
  - 4
  - 5
  - 6
  - 7
  - 8
  - 9
  - 10
  - 11
  - 12
  - 13
  - 14
  - 15
  - 16
  - 17
  - 18
  - 19
  - 20
  - 21
  - 22
  - 23
  - 24
  - 25
  - 26
  - 27
  - 28
  - 29
  - 30
  - 31
  - 32
  - 33
  - 34
  - 35
  - 36
  - 37
  - 38
  - 39
  - 40
  - 41
  - 42
  - 43
  - 44
  - 45
  - 46
  - 47
  - 48
  - 49
  - 50
  - 51
  - 52
  - 53
  - 54
  - 55
  - 56
  - 57
  - 58
  - 59
  - 60
- a. Home
  - b. Facility
  - c. Combined
15. Supervision
- a. Self-directed
  - b. Coach-led
  - c. Combined
16. Session format
- a. Individual
  - b. Group
  - c. Combined
17. Personalization
- a. Description of personalization
18. Motivation techniques
- a. Description of motivation techniques
  - b.
19. Control (eg, standard care or active controls such as rehabilitation after surgery)
- a. Standard care
    - i. Description of standard care
  - b. Static instructions
    - i. Description of static instructions
  - c. Other prehabilitation
    - i. Description of other prehabilitation
  - d. Rehabilitation
    - i. Description of rehabilitation
  - e. Other
    - i. Description of other
20. Surgical specialty
- a. Orthopedic
  - b. Major non-oncology
  - c. Cardiac/vascular
  - d. Oncology
  - e. Mixed
  - f. Other
21. Surgical procedure(s)
22. Population characteristics
- a. Total sample size
  - b. Sample size per arm
  - c. Age (average, range)
  - d. Sex (% females vs. males)
  - e. Gender (% women vs. men vs. non-binary/transgender/other)
  - f. Presence of specific risk factors
    - i. Multimorbidity ( $\geq 2$  comorbidities)
    - ii. ASA score
    - iii. Frailty
    - iv. Malnutrition
    - v. Obesity
    - vi. Baseline functional status
    - vii. Disability
    - viii. Presence of cancer
      - 1. Use of neoadjuvant therapies



- 1  
2  
3 23. Outcomes (counts, summary statistics, effect estimates with 95% CI; per time window)  
4 a. Health  
5 i. Complications  
6 1. Any  
7 2. Cardiopulmonary  
8 3. Surgical  
9 4. Infectious  
10 ii. Discharge disposition  
11 iii. Physical functional recovery  
12 iv. Disability  
13 v. Quality of life  
14 vi. Mortality  
15 b. Experience  
16 i. Pain  
17 ii. Patient satisfaction  
18 c. Resource use  
19 i. Length of stay  
20 ii. Costs  
21 d. Intervention Safety  
22 i. Any intervention-attributable adverse events  
23 ii. Cardiopulmonary adverse events during intervention period  
24 iii. Falls during intervention period  
25 iv. Assessor-confirmed intervention-attributable adverse events  
26  
27 24. Adherence  
28 a. Outcome type  
29 i. Binary  
30 1. Threshold used  
31 ii. Continuous  
32 b. Adherence rate  
33 c. Method of measurement  
34  
35 25. Feasibility measures  
36 26. Barriers and facilitators to implementation  
37  
38  
39  
40  
41  
42  
43  
44  
45  
46  
47  
48  
49  
50  
51  
52  
53  
54  
55  
56  
57  
58  
59  
60

**PRISMA-P (Preferred Reporting Items for Systematic review and Meta-Analysis Protocols) 2015 checklist: recommended items to address in a systematic review protocol\***

| Section and topic                 | Item No | Checklist item                                                                                                                                                                                                                | Page            |
|-----------------------------------|---------|-------------------------------------------------------------------------------------------------------------------------------------------------------------------------------------------------------------------------------|-----------------|
| <b>ADMINISTRATIVE INFORMATION</b> |         |                                                                                                                                                                                                                               |                 |
| Title:                            |         |                                                                                                                                                                                                                               |                 |
| Identification                    | 1a      | Identify the report as a protocol of a systematic review                                                                                                                                                                      | 1               |
| Update                            | 1b      | If the protocol is for an update of a previous systematic review, identify as such                                                                                                                                            | NA              |
| Registration                      | 2       | If registered, provide the name of the registry (such as PROSPERO) and registration number                                                                                                                                    | 6               |
| Authors:                          |         |                                                                                                                                                                                                                               |                 |
| Contact                           | 3a      | Provide name, institutional affiliation, e-mail address of all protocol authors; provide physical mailing address of corresponding author                                                                                     | 1               |
| Contributions                     | 3b      | Describe contributions of protocol authors and identify the guarantor of the review                                                                                                                                           | 14              |
| Amendments                        | 4       | If the protocol represents an amendment of a previously completed or published protocol, identify as such and list changes; otherwise, state plan for documenting important protocol amendments                               | 6               |
| Support:                          |         |                                                                                                                                                                                                                               |                 |
| Sources                           | 5a      | Indicate sources of financial or other support for the review                                                                                                                                                                 | 14              |
| Sponsor                           | 5b      | Provide name for the review funder and/or sponsor                                                                                                                                                                             | 14              |
| Role of sponsor or funder         | 5c      | Describe roles of funder(s), sponsor(s), and/or institution(s), if any, in developing the protocol                                                                                                                            | 14              |
| <b>INTRODUCTION</b>               |         |                                                                                                                                                                                                                               |                 |
| Rationale                         | 6       | Describe the rationale for the review in the context of what is already known                                                                                                                                                 | 4-5             |
| Objectives                        | 7       | Provide an explicit statement of the question(s) the review will address with reference to participants, interventions, comparators, and outcomes (PICO)                                                                      | 5               |
| <b>METHODS</b>                    |         |                                                                                                                                                                                                                               |                 |
| Eligibility criteria              | 8       | Specify the study characteristics (such as PICO, study design, setting, time frame) and report characteristics (such as years considered, language, publication status) to be used as criteria for eligibility for the review | 7               |
| Information sources               | 9       | Describe all intended information sources (such as electronic databases, contact with study authors, trial registers or other grey literature sources) with planned dates of coverage                                         | 8               |
| Search strategy                   | 10      | Present draft of search strategy to be used for at least one electronic database, including planned limits, such that it could be repeated                                                                                    | 8<br>Appendix 1 |

|                                    |     |                                                                                                                                                                                                                                                  |                 |
|------------------------------------|-----|--------------------------------------------------------------------------------------------------------------------------------------------------------------------------------------------------------------------------------------------------|-----------------|
| Study records:                     |     |                                                                                                                                                                                                                                                  |                 |
| Data management                    | 11a | Describe the mechanism(s) that will be used to manage records and data throughout the review                                                                                                                                                     | 8               |
| Selection process                  | 11b | State the process that will be used for selecting studies (such as two independent reviewers) through each phase of the review (that is, screening, eligibility and inclusion in meta-analysis)                                                  | 8               |
| Data collection process            | 11c | Describe planned method of extracting data from reports (such as piloting forms, done independently, in duplicate), any processes for obtaining and confirming data from investigators                                                           | 8               |
| Data items                         | 12  | List and define all variables for which data will be sought (such as PICO items, funding sources), any pre-planned data assumptions and simplifications                                                                                          | 9<br>Appendix 2 |
| Outcomes and prioritization        | 13  | List and define all outcomes for which data will be sought, including prioritization of main and additional outcomes, with rationale                                                                                                             | 9<br>Appendix 2 |
| Risk of bias in individual studies | 14  | Describe anticipated methods for assessing risk of bias of individual studies, including whether this will be done at the outcome or study level, or both; state how this information will be used in data synthesis                             | 9               |
| Data synthesis                     | 15a | Describe criteria under which study data will be quantitatively synthesised                                                                                                                                                                      | 9-10            |
|                                    | 15b | If data are appropriate for quantitative synthesis, describe planned summary measures, methods of handling data and methods of combining data from studies, including any planned exploration of consistency (such as $I^2$ , Kendall's $\tau$ ) | 9-10            |
|                                    | 15c | Describe any proposed additional analyses (such as sensitivity or subgroup analyses, meta-regression)                                                                                                                                            | 10-12           |
|                                    | 15d | If quantitative synthesis is not appropriate, describe the type of summary planned                                                                                                                                                               | NA              |
| Meta-bias(es)                      | 16  | Specify any planned assessment of meta-bias(es) (such as publication bias across studies, selective reporting within studies)                                                                                                                    | 9               |
| Confidence in cumulative evidence  | 17  | Describe how the strength of the body of evidence will be assessed (such as GRADE)                                                                                                                                                               | 9               |

**\* It is strongly recommended that this checklist be read in conjunction with the PRISMA-P Explanation and Elaboration (cite when available) for important clarification on the items. Amendments to a review protocol should be tracked and dated. The copyright for PRISMA-P (including checklist) is held by the PRISMA-P Group and is distributed under a Creative Commons Attribution Licence 4.0.**

*From: Shamseer L, Moher D, Clarke M, Ghersi D, Liberati A, Petticrew M, Shekelle P, Stewart L, PRISMA-P Group. Preferred reporting items for systematic review and meta-analysis protocols (PRISMA-P) 2015: elaboration and explanation. BMJ. 2015 Jan 2;349(jan02 1):g7647.*
