# Supplementary material for: Identifying relative efficacy of components of prehabilitation in adult surgical patients: protocol for a systematic review and component network meta-analysis
Source: PubMed Central journal article supplement — BMJ Open. 2022 Nov 16;12(11):e068797. doi: 10.1136/bmjopen-2022-068797 (PMC9677017; doi:10.1136/bmjopen-2022-068797), 2022-11-16
Supplement: bmjopen-2022-068797.reviewer_comments.pdf [file bmjopen-2022-068797.reviewer_comments.pdf]

## PEER REVIEW HISTORY

BMJ Open publishes all reviews undertaken for accepted manuscripts. Reviewers are asked to complete a checklist review form (<http://bmjopen.bmj.com/site/about/resources/checklist.pdf>) and are provided with free text boxes to elaborate on their assessment. These free text comments are reproduced below.

## ARTICLE DETAILS

|                            |                                                                                                                                                                                                                           |
|----------------------------|---------------------------------------------------------------------------------------------------------------------------------------------------------------------------------------------------------------------------|
| <b>TITLE (PROVISIONAL)</b> | Identifying relative efficacy of components of prehabilitation in adult surgical patients: protocol for a systematic review and component network meta-analysis                                                           |
| <b>AUTHORS</b>             | Mclsaac, Daniel; Hutton, Brian; Veroniki, Areti; Gill, Marlyn; Boland, L.; Branje, Karina; Grudzinski, Alexa L; Hladkiewicz, Emily; Shaw, Julia; Gillis, Chelsia; The Prehabilitation Knowledge Network, Group Authorship |

This article was not externally reviewed at BMJ Open. Protocols that have been independently assessed prior to submission to BMJ Open are usually fast-tracked to publication on the grounds that further substantial changes will not be possible. This independent assessment will usually be external, independent review for both a substantial grant award from a non-commercial or government funder and ethics approval.
