# Supplementary material for: Identifying relative efficacy of components of prehabilitation in adult surgical patients: protocol for a systematic review and component network meta-analysis
Source: PubMed Central journal article supplement — BMJ Open. 2022 Nov 16;12(11):e068797. doi: 10.1136/bmjopen-2022-068797 (PMC9677017; doi:10.1136/bmjopen-2022-068797), 2022-11-16
Supplement: bmjopen-2022-068797supp001.pdf [file bmjopen-2022-068797supp001.pdf]

**Supplementary file 1 – Search strategies**

Ovid MEDLINE(R) ALL

- 1 (prehab\* or pre-hab\*).tw,kf.
- 2 (preoperative\* rehabilitation or preoperative\* training).tw,kw.
- 3 ((perioperat\* or peri operat\*) adj3 (exercis\* or physiotherap\* or physical therapy or diet or nutrition\* or physical activit\* or counsel?ing)).tw.
- 4 Preoperative Exercise/
- 5 ((exercise\* or diet or nutrition\* counsel?ing) and (surgery or surgical)).ti.
- 6 ((preoperat\* or pre-operat\* or presurg\* or pre-surg\*) adj3 (exercis\* or physiotherap\* or physical therapy or diet or nutrition\* or physical activit\* or counsel?ing or conditioning)).tw,kf.
- 7 ((preoperat\* or pre-operat\* or presurg\* or pre-surg\*) adj5 ((psychological or psychosocial or cognitive) adj3 (intervention\* or therap\*))).tw,kf.
- 8 ((preoperat\* or pre-operat\* or presurg\* or pre-surg\*) adj5 (diet or dietary or nutrit\*)).tw,kf.  
2008
- 9 ((preoperat\* or pre-operat\* or presurg\* or pre-surg\*) adj5 (resistance or strength or weight or muscle) adj2 training).tw,kf.
- 10 ((preoperat\* or pre-operat\* or presurg\* or pre-surg\*) adj5 (food adj3 (counsel\* or support\* or modif\*))).tw,kf.
- 11 ((preoperat\* or pre-operat\* or presurg\* or pre-surg\*) adj5 ((energy or protein) adj3 supplement\*))).tw,kf.
- 12 ((preoperat\* or pre-operat\* or presurg\* or pre-surg\*) adj5 (exercise or exercises or stretch\* or aerobic\* or physical activit\*)).tw,kf.
- 13 ((preoperat\* or pre-operat\* or presurg\* or pre-surg\*) adj5 (cbt or cognitive behavio?r\*)).tw,kf.
- 14 ((preoperat\* or pre-operat\* or presurg\* or pre-surg\*) adj2 counsel\*).tw,kf.
- 15 ((preoperat\* or pre-operat\* or presurg\* or pre-surg\*) adj2 supplement\*).tw,kf.
- 16 or/1-15
- 17 \*Preoperative Care/ or \*Preoperative Period/ or (preoperat\* or pre-operat\* or presurg\* or pre-surg\*).ti.
- 18 exp Exercise Therapy/ or Exercise/
- 19 Physical Fitness/
- 20 (exercise or exercises or stretch\* or aerobic\* or physical activit\*).tw,kw.
- 21 ((resistance or strength or weight or muscle) adj2 training).tw.
- 22 diet therapy/ or Nutrition Therapy/ or Nutritional Support/
- 23 (diet or dietary or nutrit\*).tw,kw.
- 24 (food adj3 (counsel\* or support\* or modif\*)).tw.
- 25 ((energy or protein) adj3 supplement\*).tw.
- 26 Dietary Supplements/
- 27 Physical Therapy Modalities/ or (physical therap\* or physiotherap\*).tw,kw.
- 28 Counseling/ or counsel?ing.tw,kw.
- 29 behavior therapy/ or cognitive behavioral therapy/ or Psychotherapy/ or Relaxation Therapy/
- 30 Stress, Psychological/rh, th
- 31 ((psychological or psychosocial or cognitive) adj3 (intervention\* or therap\*)).tw.

- 32 or/18-31
- 33 17 and 32
- 34 16 or 33
- 35 randomized controlled trial.pt.
- 36 controlled clinical trial.pt.
- 37 random\*.tw.
- 38 placebo.ab.
- 39 clinical trials as topic.sh.
- 40 trial.ti.
- 41 or/35-40
- 42 exp animals/ not humans/
- 43 (infant/ or child/ or adolescent/) not adult/
- 44 41 not (42 or 43)
- 45 34 and 44
- 46 45 use medall

## Embase Classic+Embase

- 1 (prehab\* or pre-hab\*).mp.
- 2 (preoperative\* rehabilitation or preoperative\* training).tw.
- 3 ((perioperat\* or peri operat\*) adj3 (exercis\* or physiotherap\* or physical therapy or diet or nutrition\* or physical activit\* or counsel?ing)).tw.
- 4 ((preoperat\* or pre-operat\* or presurg\* or pre-surg\*) adj5 (exercis\* or physiotherap\* or physical therapy or diet or nutrition\* or physical activit\* or counsel?ing or conditioning)).tw.
- 5 ((preoperat\* or pre-operat\* or presurg\* or pre-surg\*) adj5 (diet or dietary or nutrit\*)).tw.
- 6 ((preoperat\* or pre-operat\* or presurg\* or pre-surg\*) adj5 ((psychological or psychosocial or cognitive) adj3 (intervention\* or therap\*))).tw.
- 7 ((preoperat\* or pre-operat\* or presurg\* or pre-surg\*) adj5 (resistance or strength or weight or muscle) adj2 training).tw.
- 8 ((preoperat\* or pre-operat\* or presurg\* or pre-surg\*) adj5 (food adj3 (counsel\* or support\* or modif\*))).tw.
- 9 ((preoperat\* or pre-operat\* or presurg\* or pre-surg\*) adj5 ((energy or protein) adj3 supplement\*))).tw.
- 10 ((preoperat\* or pre-operat\* or presurg\* or pre-surg\*) adj5 (stretch\* or aerobic\*)).tw.
- 11 ((exercise\* or diet or nutrition\* counsel?ing) and (surgery or surgical)).ti.
- 12 ((preoperat\* or pre-operat\* or presurg\* or pre-surg\*) adj5 (cbt or cognitive behavio?r\*)).tw.
- 13 ((preoperat\* or pre-operat\* or presurg\* or pre-surg\*) adj2 counsel\*).tw.
- 14 ((preoperat\* or pre-operat\* or presurg\* or pre-surg\*) adj2 supplement\*).tw.
- 15 or/1-14
- 16 \*preoperative care/ or \*preoperative period/ or (preoperat\* or pre-operat\* or presurg\* or pre-surg\*).ti.
- 17 exp \*kinesiotherapy/
- 18 exp \*exercise/
- 19 (exercise or exercises or stretch\* or aerobic\* or physical activit\*).ti.
- 20 ((resistance or strength or weight or muscle) adj2 training).ti.
- 21 diet therapy/ or diet supplementation/
- 22 (diet or dietary or nutrit\*).ti.

23 (food adj3 (counsel\* or support\* or modif\*)).ti.  
 24 ((energy or protein) adj3 supplement\*).tw.  
 25 physiotherapy/  
 26 (physical therap\* or physiotherap\*).ti.  
 27 counseling/ or nutritional counseling/  
 28 behavior therapy/  
 29 cognitive behavioral therapy/ or cognitive therapy/  
 30 psychotherapy/  
 31 ((psychological or psychosocial or cognitive) adj3 (intervention\* or therap\*)).ti.  
 32 or/17-31  
 33 16 and 32  
 34 15 or 33  
 35 double-blind\*.mp. or placebo\*.tw. or blind\*.tw. or trial.ti.  
 36 random\*.ti.  
 37 (random\* adj2 (trial\* or stud\*)).tw.  
 38 35 or 36 or 37  
 39 34 and 38  
 40 (child/ or childhood/ or infant/) not adult/  
 41 (exp animal/ or nonhuman/) not exp human/  
 42 39 not (40 or 41)

#### EBM Reviews - Cochrane Central Register of Controlled Trials

1 (prehab\* or pre-hab\*).tw,kw.  
 2 (preoperative\* rehabilitation or preoperative\* training).tw,kw.  
 3 ((perioperat\* or peri operat\*) adj3 (exercis\* or physiotherap\* or physical therapy or diet or nutrition\* or physical activit\* or counsel?ing)).tw.  
 4 ((preoperat\* or pre-operat\* or presurg\* or pre-surg\*) adj2 (exercis\* or physiotherap\* or physical therapy or diet or nutrition\* or physical activit\* or counsel?ing or conditioning)).tw.  
 5 ((preoperat\* or pre-operat\* or presurg\* or pre-surg\*) adj4 (exercis\* or physiotherap\* or physical therapy or diet or nutrition\* or physical activit\* or counsel?ing or conditioning)).ti.  
 6 Preoperative Exercise/  
 7 ((exercise\* or diet or nutrition\* counsel?ing) and (surgery or surgical)).ti.  
 8 ((preoperat\* or pre-operat\* or presurg\* or pre-surg\*) adj5 ((psychological or psychosocial or cognitive) adj3 (intervention\* or therap\*))).tw.  
 9 ((preoperat\* or pre-operat\* or presurg\* or pre-surg\*) adj2 (diet or dietary or nutrit\*)).tw.  
 10 ((preoperat\* or pre-operat\* or presurg\* or pre-surg\*) adj5 (resistance or strength or weight or muscle) adj2 training).tw.  
 11 ((preoperat\* or pre-operat\* or presurg\* or pre-surg\*) adj5 (food adj3 (counsel\* or support\* or modif\*))).tw.  
 12 ((preoperat\* or pre-operat\* or presurg\* or pre-surg\*) adj5 ((energy or protein) adj3 supplement\*))).tw.  
 13 ((preoperat\* or pre-operat\* or presurg\* or pre-surg\*) adj3 (exercise or exercises or stretch\* or aerobic\* or physical activit\*)).tw.  
 14 ((preoperat\* or pre-operat\* or presurg\* or pre-surg\*) adj3 (cbt or cognitive behavio?r\*)).tw.  
 15 ((preoperat\* or pre-operat\* or presurg\* or pre-surg\*) adj2 counsel\*).tw.  
 16 ((preoperat\* or pre-operat\* or presurg\* or pre-surg\*) adj2 supplement\*).tw.

- 17 or/1-16  
 18 (infant/ or child/ or adolescent/) not adult/  
 19 17 not 18  
 20 remove duplicates from 19

#### APA PsycInfo

- 1 (prehab\* or pre-hab\*).tw.  
 2 (preoperative\* rehabilitation or preoperative\* training).tw.  
 3 ((perioperat\* or peri operat\*) adj3 (exercis\* or physiotherap\* or physical therapy or diet or nutrition\* or physical activit\* or counsel?ing)).tw.  
 4 ((exercise\* or diet or nutrition\* counsel?ing) and (surgery or surgical)).ti.  
 5 1 or 2 or 3 or 4  
 6 surgical patients/ or (preoperat\* or pre-operat\* or presurg\* or pre-surg\*).ti.  
 7 exp exercise/ or physical activity/ or physical fitness/  
 8 (exercise or exercises or stretch\* or aerobic\* or physical activit\*).tw.  
 9 ((resistance or strength or weight or muscle) adj2 training).tw.  
 10 Diets/  
 11 Nutrition/ or Dietary Supplements/  
 12 (diet or dietary or nutrit\*).tw.  
 13 (food adj3 (counsel\* or support\* or modif\*)).tw.  
 14 ((energy or protein) adj3 supplement\*).tw.  
 15 physical therapy/ or physical treatment methods/  
 16 (physical therap\* or physiotherap\*).tw.  
 17 Counseling/  
 18 counsel?ing.tw.  
 19 Behavior Therapy/ or Cognitive Behavior Therapy/ or Cognitive Therapy/  
 20 Psychotherapy/  
 21 ((psychological or psychosocial or cognitive) adj3 (intervention\* or therap\*)).tw.  
 22 or/7-21  
 23 6 and 22  
 24 5 or 23  
 25 exp Clinical Trials/ or Placebo/ or (random\* or sham or placebo\* or ((singl\* or doubl\*) adj (blind\* or dumm\* or mask\*)) or ((tripl\* or trebl\*) adj (blind\* or dumm\* or mask\*)) or (control\* adj3 (study or studies or trial\* or group\*)) or Nonrandom\* or non random\* or non-random\* or quasi-random\* or quasirandom\* or allocated or ((open label or open-label) adj5 (study or studies or trial\*)) or ((equivalence or superiority or non-inferiority or noninferiority) adj3 (study or studies or trial\*)) or ((pragmatic or practical) adj3 trial\*) or ((quasiexperimental or quasi-experimental) adj3 (study or studies or trial\*)) or (phase adj3 (III or "3") adj3 (study or studies or trial\*))).ti,ab,hw.  
 26 24 and 25

#### CinahlComplete

| #   | Query                                                                                                                                                                                                                                                                                                      |
|-----|------------------------------------------------------------------------------------------------------------------------------------------------------------------------------------------------------------------------------------------------------------------------------------------------------------|
| S1  | (MH "Prehabilitation")                                                                                                                                                                                                                                                                                     |
| S2  | TI ( (prehab* or pre-hab* ) OR AB ( (prehab* or pre-hab* ) ) )                                                                                                                                                                                                                                             |
| S3  | TI ( (preoperative* rehabilitation or preoperative* training) ) OR AB ( (preoperative* rehabilitation or preoperative* training) )                                                                                                                                                                         |
| S4  | TI ( ((perioperat* or peri operat*) N3 (exercis* or physiotherap* or physical therapy or diet or nutrition* or physical activit* or counsel?ing)) ) OR AB ( ((perioperat* or peri operat*) N3 (exercis* or physiotherap* or physical therapy or diet or nutrition* or physical activit* or counsel?ing)) ) |
| S5  | S1 OR S2 OR S3 OR S4                                                                                                                                                                                                                                                                                       |
| S6  | (MH "Preoperative Care") or (MH "Preoperative Period") or TI (preoperat* or pre-operat* or presurg* or pre-surg)                                                                                                                                                                                           |
| S7  | (MH "Therapeutic Exercise+")                                                                                                                                                                                                                                                                               |
| S8  | (MH "Exercise+")                                                                                                                                                                                                                                                                                           |
| S9  | (MH "Physical Fitness+")                                                                                                                                                                                                                                                                                   |
| S10 | TI ( (exercise or exercises or stretch* or aerobic* or physical activit* ) ) OR AB ( (exercise or exercises or stretch* or aerobic* or physical activit* ) )                                                                                                                                               |
| S11 | TI ( (resistance or strength or weight or muscle) N2 training ) OR AB ( (resistance or strength or weight or muscle) N2 training )                                                                                                                                                                         |
| S12 | (MH "Diet Therapy+")                                                                                                                                                                                                                                                                                       |
| S13 | (MH "Nutritional Support+")                                                                                                                                                                                                                                                                                |

- S14 TI ( (diet or dietary or nutrit\*) ) OR AB ( (diet or dietary or nutrit\*) )
- S15 TI ( food N3 (counsel\* or support\* or modif\*) ) OR AB ( food N3 (counsel\* or support\* or modif\*) )
- S16 TI ( (energy or protein) N3 supplement\* ) OR AB ( (energy or protein) N3 supplement\* )
- S17 (MH "Dietary Supplementation")
- S18 (MH "Physical Therapy+")
- S19 (MH "Physical Therapy Service")
- S20 TI ( (physical therap\* or physiotherap\*) ) OR AB ( (physical therap\* or physiotherap\*) )
- S21 (MH "Counseling+")
- S22 TI counsel?ing OR AB counsel?ing
- S23 (MH "Behavior Therapy") OR (MH "Cognitive Therapy")
- S24 (MH "Psychotherapy+")
- S25 TI ( (psychological or psychosocial or cognitive) N3 (intervention\* or therap\*) ) OR AB ( (psychological or psychosocial or cognitive) N3 (intervention\* or therap\*) )
- S26 S7 OR S8 OR S9 OR S10 OR S11 OR S12 OR S13 OR S14 OR S15 OR S16 OR S17 OR S18 OR S19 OR S20 OR S21 OR S22 OR S23 OR S24 OR S25
- S27 S6 AND S26
- S28 TI ( (preoperat\* or pre-operat\* or presurg\* or pre-surg\*) N3 (exercis\* or physiotherap\* or physical therapy or diet or nutrition\* or physical activit\* or counsel?ing or conditioning) ) OR AB ( (preoperat\* or pre-operat\* or presurg\* or pre-surg\*) N3 (exercis\* or physiotherap\* or

- physical therapy or diet or nutrition\* or physical activit\* or counsel?ing or conditioning) )
- S29 TI ( ((preoperat\* or pre-operat\* or presurg\* or pre-surg\*)N5 ((psychological or psychosocial or cognitive) N3 (intervention\* or therap\*)) ) OR AB ( ((preoperat\* or pre-operat\* or presurg\* or pre-surg\*)N5 ((psychological or psychosocial or cognitive) N3 (intervention\* or therap\*)) )
- S30 TI ( ((preoperat\* or pre-operat\* or presurg\* or pre-surg\*) N5 (diet or dietary or nutrit\*)) ) OR AB ( ((preoperat\* or pre-operat\* or presurg\* or pre-surg\*) N5 (diet or dietary or nutrit\*)) )
- S31 TI ( ((preoperat\* or pre-operat\* or presurg\* or pre-surg\*) N5 (resistance or strength or weight or muscle) N2 training) ) OR AB ( ((preoperat\* or pre-operat\* or presurg\* or pre-surg\*) N5 (resistance or strength or weight or muscle) N2 training) )
- S32 TI ( ((preoperat\* or pre-operat\* or presurg\* or pre-surg\*) N5 ((energy or protein) N3 supplement\*)) ) OR AB ( ((preoperat\* or pre-operat\* or presurg\* or pre-surg\*) N5 ((energy or protein) N3 supplement\*)) )
- S33 TI ( ((preoperat\* or pre-operat\* or presurg\* or pre-surg\*) N5 (exercise or exercises or stretch\* or aerobic\* or physical activit\*)) ) OR AB ( ((preoperat\* or pre-operat\* or presurg\* or pre-surg\*) N5 (exercise or exercises or stretch\* or aerobic\* or physical activit\*)) )
- S34 TI ( (preoperat\* or pre-operat\* or presurg\* or pre-surg\*) N5 (cbt or cognitive behavior\* or cognitive behaviour)) ) OR AB ( (preoperat\* or pre-operat\* or presurg\* or pre-surg\*) N5 (cbt or cognitive behavior\* or cognitive behaviour)) )
- S35 TI ( ((preoperat\* or pre-operat\* or presurg\* or pre-surg\*) N2 counsel\*) ) OR AB ( ((preoperat\* or pre-operat\* or presurg\* or pre-surg\*) N2 counsel\*) )
- S36 TI ( ((preoperat\* or pre-operat\* or presurg\* or pre-surg\*) N2 supplement ) OR AB ( ((preoperat\* or pre-operat\* or presurg\* or pre-surg\*) N2 supplement )

|     |                                                                                                                                                                                                                                                                                                                                                                                                                                                                                                                                  |
|-----|----------------------------------------------------------------------------------------------------------------------------------------------------------------------------------------------------------------------------------------------------------------------------------------------------------------------------------------------------------------------------------------------------------------------------------------------------------------------------------------------------------------------------------|
| S37 | S5 OR S27 OR S28 OR S29 OR S30 OR S31 OR S32 OR S33 OR S34 OR S35 OR S36                                                                                                                                                                                                                                                                                                                                                                                                                                                         |
| S38 | ( MH ( randomized controlled trials OR double-blind studies OR single-blind studies OR random assignment OR pretest-posttest design OR cluster sample ) OR TI ( randomised OR randomized ) OR AB random* OR TI trial OR ( (MH (sample size) AND AB (assigned OR allocated OR control)) ) OR MH ( placebos OR crossover design OR comparative studies ) OR AB ( (control W5 group) OR (cluster W3 RCT) OR PT (randomized controlled trial)) ) NOT ( ( MH animals+ OR MH (animal studies) OR TI (animal model*) ) NOT MH (human) ) |
| S39 | S37 AND S38                                                                                                                                                                                                                                                                                                                                                                                                                                                                                                                      |
| S40 | (MH "Child+") NOT (MH "Adult+")                                                                                                                                                                                                                                                                                                                                                                                                                                                                                                  |
| S41 | S39 NOT S40                                                                                                                                                                                                                                                                                                                                                                                                                                                                                                                      |

---

#### Web of Science

(infant/ or child/ or adolescent/) not adult/

((preoperat\* or pre-operat\* or presurg\* or pre-surg\*) N5 (cbt or cognitive behavior\* or cognitive behaviour)).

1. (ALL=(prehab\*)) OR ALL=("pre habilitation")
2. (TI=((preoperat\* OR pre-operat\* OR presurg\* OR pre-surg\*))) AND TI=(exercis\* or physiotherap\* or physical therapy or diet or nutrition\* or physical activit\* or counsel\* OR condition\*)
3. (TI=((preoperat\* OR pre-operat\* OR presurg\* OR pre-surg\*))) AND TI=(counsel\* OR psych\* OR behavior therap\* OR behaviour therap\*)
4. (TI=(preoperat\* OR pre-operat\* OR presurg\* OR pre-surg\*)) AND TI=(nutrition OR diet OR supplement OR dietary)
5. (TI=(exercise\* or diet or nutrition\* counsel\*)) AND TI=(surgery or surgical)
6. (((#1) OR #2) OR #3) OR #4) OR #5



## 7. Search

(TS=(randomised OR randomized OR randomisation OR randomisation OR placebo\* OR (random\* AND (allocat\* OR assign\*))) OR (blind\* AND (single OR double OR treble OR triple))) NOT TS=(animal or animals or pisces or fish or fishes or catfish or catfishes or sheatfish or silurus or arius or heteropneustes or clarias or gariepinus or fathead minnow or fathead minnows or pimephales or promelas or cichlidae or trout or trouts or char or chars or salvelinus or salmo or oncorhynchus or guppy or guppies or millionfish or poecilia or goldfish or goldfishes or carassius or auratus or mullet or mullets or mugil or curema or shark or sharks or cod or cods or gadus or morhua or carp or carps or cyprinus or carpio or killifish or eel or eels or anguilla or zander or sander or lucioperca or stizostedion or turbot or turbots or psetta or flatfish or flatfishes or plaice or pleuronectes or platessa or tilapia or tilapias or oreochromis or sarotherodon or common sole or dover sole or solea or zebrafish or zebrafishes or danio or rerio or seabass or dicentrarchus or labrax or morone or lamprey or lampreys or petromyzon or pumpkinseed or pumpkinseeds or lepomis or gibbosus or herring or clupea or harengus or amphibia or amphibian or amphibians or anura or salientia or frog or frogs or rana or toad or toads or bufo or xenopus or laevis or bombina or epidalea or calamita or salamander or salamanders or newt or newts or triturus or reptilia or reptile or reptiles or bearded dragon or pogona or vitticeps or iguana or iguanas or lizard or lizards or anguis fragilis or turtle or turtles or snakes or snake or aves or bird or birds or quail or quails or coturnix or bobwhite or colinus or virginianus or poultry or poultries or fowl or fowls or chicken or chickens or gallus or zebra finch or taeniopygia or guttata or canary or canaries or serinus or canaria or parakeet or parakeets or grasskeet or parrot or parrots or psittacine or psittacines or shelduck or tadorna or goose or geese or branta or leucopsis or woodlark or lullula or flycatcher or ficedula or hypoleuca or dove or doves or geopelia or cuneata or duck or ducks or greylag or graylag or anser or harrier or circus pygargus or red knot or great knot or calidris or canutus or godwit or limosa or lapponica or meleagris or gallopavo or jackdaw or corvus or monedula or ruff or philomachus or pugnax or lapwing or peewit or plover or vanellus or swan or cygnus or columbianus or bewickii or gull or chroicocephalus or ridibundus or albifrons or great tit or parus or aythya or fuligula or streptopelia or risoria or spoonbill or platalea or leucorodia or blackbird or turdus or merula or blue tit or cyanistes or pigeon or pigeons or columba or pintail or anas or starling or sturnus or owl or athene noctua or pochard or ferina or cockatiel or nymphicus or hollandicus or skylark or alauda or tern or sterna or teal or crecca or oystercatcher or haematopus or ostralegus or shrew or shrews or sores or araneus or crocidura or russula or european mole or talpa or chiroptera or bat or bats or eptesicus or serotinus or myotis or dasynceme or daubentonii or pipistrelle or pipistrellus or cat or cats or felis or catus or feline or dog or dogs or canis or canine or canines or otter or otters or lutra or badger or badgers or meles or fitchew or fitch or fougart or foulmart or ferrets or ferret or polecat or polecats or mustela or putorius or weasel or weasels or fox or foxes or vulpes or common seal or phoca or vitulina or grey seal or halichoerus or horse or horses or equus or equine or equidae or donkey or donkeys or mule or mules or pig or pigs or swine or swines or hog or hogs or boar or boars or porcine or piglet or piglets or sus or scrofa or llama or llamas or lama or glama or deer or deers or cervus or elaphus or cow or cows or bos taurus or bos indicus or bovine or bull or bulls or cattle or bison or bisons or sheep or sheeps or ovis aries or ovine or lamb or lambs or mouflon or mouflons or goat or goats or capra or caprine or chamois or rupicapra or leporidae or lagomorpha or lagomorph or rabbit or rabbits or oryctolagus or cuniculus or laprine or hares or lepus or rodentia or rodent or rodents or murinae or mouse or mice or mus or musculus or murine or woodmouse or apodemus or rat or rats or rattus or norvegicus or guinea pig or guinea pigs or cavia or porcellus or hamster or hamsters or mesocricetus or cricetus or cricetus or gerbil or gerbils or jird or jirds or meriones or unguiculatus or jerboa or jerboas or jaculus or chinchilla or chinchillas or beaver or beavers or castor fiber or castor canadensis or sciuridae or squirrel or squirrels or sciurus or chipmunk or chipmunks or marmot

or marmots or marmota or suslik or susliks or spermophilus or cynomys or cottonrat or cottonrats or sigmodon or vole or voles or microtus or myodes or glareolus or primate or primates or prosimian or prosimians or lemur or lemurs or lemuridae or loris or bush baby or bush babies or bushbaby or bushbabies or galago or galagos or anthropoidea or anthropoids or simian or simians or monkey or monkeys or marmoset or marmosets or callithrix or cebuella or tamarin or tamarins or saguinus or leontopithecus or squirrel monkey or squirrel monkeys or saimiri or night monkey or night monkeys or owl monkey or owl monkeys or douroucoulis or aotus or spider monkey or spider monkeys or ateles or baboon or baboons or papio or rhesus monkey or macaque or macaca or mulatta or cynomolgus or fascicularis or green monkey or green monkeys or chlorocebus or vervet or vervets or pygerythrus or hominoidea or ape or apes or hylobatidae or gibbon or gibbons or siamang or siamangs or nomascus or symphalangus or hominidae or orangutan or orangutans or pongo or chimpanzee or chimpanzees or pan troglodytes or bonobo or bonobos or pan paniscus or gorilla or gorillas or troglodytes))

8. (#6) AND #7
