# Supplementary material for: Identifying relative efficacy of components of prehabilitation in adult surgical patients: protocol for a systematic review and component network meta-analysis
Source: PubMed Central journal article supplement — BMJ Open. 2022 Nov 16;12(11):e068797. doi: 10.1136/bmjopen-2022-068797 (PMC9677017; doi:10.1136/bmjopen-2022-068797), 2022-11-16
Supplement: bmjopen-2022-068797supp002.pdf [file bmjopen-2022-068797supp002.pdf]

**Supplementary file 2 – Datapoints extracted from included RCTs**

1. Author
2. Year of publication
3. Countries of origin
4. Study start and end dates
5. Patient partners
  - a. As authors
    - i. Demographics
    - ii. Roles
  - b. As acknowledged collaborators
    - i. Demographics
    - ii. Roles
6. Prehabilitation definition
  - a. In introduction or background
  - b. In methods
7. Prehabilitation characteristics
  - a. Multimodal (y/n)
8. Prehabilitation Components (eg, exercise, nutrition, psychosocial, cognitive)
  - a. Type of exercise
    - i. Unimodal
    - ii. Multimodal
    - iii. Interval training
    - iv. Other
    - v. Components (eg, cardio, strength, stretching, respiratory exercise)
  - b. Type of nutrition
    - i. Counselling
    - ii. Supplementation
    - iii. Combined
    - iv. Other
  - c. Type of psychosocial
    - i. Motivational interviewing
    - ii. Anxiety management
    - iii. Stress management
    - iv. Other
  - d. Type of cognitive
  - e. Other co-interventions
9. Enhanced recovery after surgery (ERAS) (y/n)
10. Weight loss objective (y/n)
11. Duration of prehabilitation
  - a. Average
  - b. Program
    - i. Minimum participation
    - ii. Maximum participation
  - c. Per session
12. Frequency of prehabilitation
13. Intervention time-point
  - a. Preoperative only
  - b. Preoperative plus rehab after surgery
14. Location of prehabilitation

- a. Home
- b. Facility
- c. Combined
15. Supervision
  - a. Self-directed
  - b. Coach-led
  - c. Combined
16. Session format
  - a. Individual
  - b. Group
  - c. Combined
17. Personalization
  - a. Description of personalization
18. Motivation techniques
  - a. Description of motivation techniques
  - b.
19. Control (eg, standard care or active controls such as rehabilitation after surgery)
  - a. Standard care
    - i. Description of standard care
  - b. Static instructions
    - i. Description of static instructions
  - c. Other prehabilitation
    - i. Description of other prehabilitation
  - d. Rehabilitation
    - i. Description of rehabilitation
  - e. Other
    - i. Description of other
20. Surgical specialty
  - a. Orthopedic
  - b. Major non-oncology
  - c. Cardiac/vascular
  - d. Oncology
  - e. Mixed
  - f. Other
21. Surgical procedure(s)
22. Population characteristics
  - a. Total sample size
  - b. Sample size per arm
  - c. Age (average, range)
  - d. Sex (% females vs. males)
  - e. Gender (% women vs. men vs. non-binary/transgender/other)
  - f. Presence of specific risk factors
    - i. Multimorbidity ( $\geq 2$  comorbidities)
    - ii. ASA score
    - iii. Frailty
    - iv. Malnutrition
    - v. Obesity
    - vi. Baseline functional status
    - vii. Disability
    - viii. Presence of cancer
      1. Use of neoadjuvant therapies

23. Outcomes (counts, summary statistics, effect estimates with 95%CI; per time window)
  - a. Health
    - i. Complications
      1. Any
      2. Cardiopulmonary
      3. Surgical
      4. Infectious
    - ii. Discharge disposition
    - iii. Physical functional recovery
    - iv. Disability
    - v. Quality of life
    - vi. Mortality
  - b. Experience
    - i. Pain
    - ii. Patient satisfaction
  - c. Resource use
    - i. Length of stay
    - ii. Costs
  - d. Intervention Safety
    - i. Any intervention-attributable adverse events
    - ii. Cardiopulmonary adverse events during intervention period
    - iii. Falls during intervention period
    - iv. Assessor-confirmed intervention-attributable adverse events
24. Adherence
  - a. Outcome type
    - i. Binary
      1. Threshold used
    - ii. Continuous
  - b. Adherence rate
  - c. Method of measurement
25. Feasibility measures
26. Barriers and facilitators to implementation
